# Supplementary material for: Cellular evolution of the hypothalamic preoptic area of behaviorally divergent deer mice
Source: eLife. 2025 Apr 7;13:RP103109. doi: 10.7554/eLife.103109 (PMC11975375; doi:10.7554/eLife.103109)
Supplement: Figure 1—figure supplement 2—source data 1. [file elife-103109-fig1-figsupp2-data1.xlsx]

## Sheet: Sheet1
Figure 1 - figure supplement 2 - source data 1
Replicate	P. man female	P. man male	P. pol female	P. pol male	Doublet	Doublet fraction
rep01	2161	1978	2259	2493	1022	0.114948
rep02	3920	4148	3398	4068	1229	0.0791168
rep03	4544	4693	4334	4330	2083	0.116362
rep04	5051	4872	4407	4722	2382	0.125026
rep05	4566	4572	4182	4318	1784	0.101145
rep06	4014	4108	3821	4098	2090	0.130291
