# Supplementary material for: Cellular evolution of the hypothalamic preoptic area of behaviorally divergent deer mice
Source: eLife. 2025 Apr 7;13:RP103109. doi: 10.7554/eLife.103109 (PMC11975375; doi:10.7554/eLife.103109)
Supplement: Figure 1—figure supplement 3—source data 1. [file elife-103109-fig1-figsupp3-data1.xlsx]

## Sheet: Sheet1
Figure 1 - figure supplement 3 - source data 2
Sample	Replicate	Number of droplets	Median number of genes / droplet	Median number of Xist read counts / droplet
P. maniculatus female	rep01	2161	1580	3
	rep02	3920	1544.5	4
	rep03	4544	1901	4
	rep04	5051	2015	4
	rep05	4566	1854	4
	rep06	4014	2072	3
P. maniculatus male	rep01	1978	1653.5	0
	rep02	4148	1630.5	0
	rep03	4693	1796	0
	rep04	4872	2001	0
	rep05	4572	1738	0
	rep06	4108	1675	0
P. polionotus female	rep01	2259	1502	3
	rep02	3398	1747	4
	rep03	4334	1944	3
	rep04	4407	2086	3
	rep05	4182	1807	3
	rep06	3821	1650	2
P. polionotus male	rep01	2493	1709	0
	rep02	4068	1482	0
	rep03	4330	1834.5	0
	rep04	4722	2098	0
	rep05	4318	1618	0
	rep06	4098	1627	0
