# Supplementary material for: Cellular evolution of the hypothalamic preoptic area of behaviorally divergent deer mice
Source: eLife. 2025 Apr 7;13:RP103109. doi: 10.7554/eLife.103109 (PMC11975375; doi:10.7554/eLife.103109)
Supplement: Figure 1—figure supplement 8—source data 1. [file elife-103109-fig1-figsupp8-data1.xlsx]

## Sheet: Sheet1
Figure 1 - figure supplement 8 - source data 3
Inhibitory
	i18:Gal/Tac2	i20:Gal/Moxd1	i3:Penk/Nts	i2:Tac1/Pdyn	i14:Avp/Cck	i23:Crh/Nts	i16:Gal/Th	i25:Npy/Etv1	i5:Gaba/Pou3f3	i21:Sst/Pou3f3	i8:Gal/Amigo2	i17:Th/Nos1	i6:Avp/Nms	i4:Gaba/Mylk	i30:Vip	i10:Tac1/Nts	i26:Tac1/Prok2	i35:Crh/Tac2	i44:Th/Cxcl14	i43:Chat	i42:Pthlh	i41:Npy/Penk	i40:Sst/Reln	i38:Kiss1/Th	i37:Bdnf/Chrm2	i32:Sst/Npy	i31:Calca	i29:Gaba/Igsf1	i28:Gaba/Six6	i27:Th/Trh	i24:Nmu	i22:Gal/Pmaip1	i39:Gaba	i15:Gaba	i13:Gaba	i12:Gaba	i11:Gaba	i9:Gaba	i7:Gaba	i1:Gaba
5	0.433972	0.000504032	0	0	0	0.030746	0.00856855	0.000504032	0.0146169	0.000504032	0.144657	0.0120968	0.000504032	0.000504032	0	0	0.0146169	0.00352823	0	0	0	0	0.00100806	0	0	0	0.00403226	0.0236895	0	0.000504032	0.00604839	0.000504032	0	0.000504032	0.00705645	0.0252016	0.0282258	0.00806452	0.0766129	0.153226
9	0.00811993	0.256715	0	0	0.00062461	0.00374766	0.0349781	0.00062461	0.00874453	0.00687071	0.00437227	0.0137414	0.00749532	0	0.00062461	0.00062461	0.0149906	0.0262336	0	0	0.00187383	0.00062461	0.0537164	0	0	0.00811993	0.00562149	0.00124922	0.00312305	0.00874453	0.00062461	0	0	0.00124922	0.00124922	0.00437227	0.00749532	0.180512	0.258588	0.0743285
12	0	0	0.377305	0.524823	0	0	0	0	0	0.00070922	0	0	0	0.0191489	0	0.048227	0.00425532	0	0.00780142	0	0	0	0	0	0	0	0	0	0	0	0	0.00070922	0	0	0	0	0.012766	0.00425532	0	0
15	0	0	0	0	0.1727	0.000754148	0.00226244	0	0.000754148	0	0.0015083	0.0015083	0.729261	0	0.00678733	0	0	0	0	0	0	0	0	0	0	0	0.00226244	0	0.00829563	0	0.0015083	0.00226244	0	0	0	0.00226244	0.000754148	0.0113122	0.000754148	0.0550528
17	0.0266249	0	0	0	0	0.289742	0.00313234	0.000783085	0.110415	0	0.0595145	0.0877056	0.000783085	0.000783085	0	0	0.0054816	0.0399374	0	0.018011	0.00156617	0.000783085	0.000783085	0	0	0	0.00391543	0.00156617	0	0.00313234	0.149569	0	0	0	0.0305403	0.00704777	0.0509005	0.00234926	0.0211433	0.0837901
20	0.0221631	0.00620567	0	0	0.0035461	0.00177305	0.337766	0	0.00265957	0.000886525	0.245567	0.0478723	0.0452128	0	0	0	0	0.00265957	0	0	0.000886525	0	0	0.00177305	0	0	0.000886525	0	0.0035461	0.00265957	0.0070922	0.00443262	0	0	0	0.0159574	0.0035461	0.0381206	0.0274823	0.177305
22	0.0125969	0.00968992	0.000968992	0	0	0	0	0.158915	0.448643	0.0988372	0.000968992	0.00193798	0.00678295	0.00872093	0.00484496	0	0.00290698	0.00193798	0	0.00290698	0.00193798	0.0474806	0.00290698	0	0	0.0668605	0	0	0	0.0193798	0.00290698	0	0	0	0.0125969	0	0.0242248	0.0203488	0.0222868	0.0184109
30	0.0320781	0	0	0	0	0	0	0.0181311	0.843794	0.0041841	0.0013947	0.0027894	0	0	0	0	0	0.0334728	0	0.0097629	0	0.0013947	0	0	0	0	0	0	0	0.0041841	0	0	0	0	0.0292887	0	0.0083682	0	0	0.0111576
49	0.00584795	0	0.00584795	0	0	0	0	0	0.836257	0	0	0	0	0	0	0	0	0	0	0	0	0	0	0	0	0	0	0	0	0	0	0	0	0	0.111111	0	0	0	0	0.0409357
29	0	0.00268097	0	0	0	0.0120643	0.00268097	0	0.00134048	0.184987	0.00670241	0.215818	0.101877	0	0.00134048	0	0	0.258713	0	0	0	0	0.00268097	0	0	0.100536	0.00134048	0.00670241	0.00268097	0.0134048	0.00268097	0	0.00134048	0	0.00268097	0.00268097	0.00670241	0.0308311	0.0080429	0.0294906
31	0.0649547	0	0	0	0.00151057	0.00151057	0.010574	0	0.00151057	0	0.799094	0.010574	0.00302115	0	0	0	0	0	0	0	0	0	0	0	0.00151057	0	0	0	0	0	0	0.00302115	0	0	0.00302115	0.0120846	0.0060423	0.00453172	0.00453172	0.0725076
32	0.027735	0	0	0	0.00154083	0	0	0	0.0400616	0.00154083	0.0138675	0.534669	0.0138675	0	0	0	0	0.0046225	0	0	0.00154083	0	0.00154083	0	0	0	0.00924499	0.00154083	0	0	0.0323575	0	0	0	0.0693374	0.0446841	0.0046225	0.00770416	0.0154083	0.174114
34	0	0	0	0	0	0.00179533	0	0	0	0	0	0	0.998205	0	0	0	0	0	0	0	0	0	0	0	0	0	0	0	0	0	0	0	0	0	0	0	0	0	0	0
38	0	0	0.0105708	0.012685	0	0	0.00211416	0	0.00211416	0.00211416	0	0	0.00211416	0.926004	0	0	0	0	0	0	0	0	0	0	0	0	0	0	0	0	0	0	0	0	0	0	0.0317125	0.00211416	0.00845666	0
41	0	0	0	0	0.100402	0	0	0	0	0	0	0	0.108434	0	0.787149	0	0	0	0	0	0	0	0	0	0	0	0.00401606	0	0	0	0	0	0	0	0	0	0	0	0	0
46	0	0	0	0	0.0189573	0	0	0	0	0	0	0.00473934	0.156398	0	0.668246	0	0	0.00473934	0	0	0	0	0	0	0	0.00473934	0.118483	0	0.00473934	0	0	0	0	0	0	0	0.00473934	0	0	0.014218
43	0	0	0	0.150628	0	0	0	0	0.0041841	0	0	0.0083682	0	0.0962343	0.0041841	0.150628	0.288703	0.0041841	0	0	0	0	0	0	0.0125523	0	0	0	0	0.0041841	0.0041841	0.0292887	0	0	0.0083682	0.0041841	0.0041841	0.225941	0	0
50	0.0182927	0	0	0.0182927	0	0	0	0	0.00609756	0.0121951	0.00609756	0	0	0.0426829	0	0	0.146341	0.52439	0	0	0	0	0	0	0	0	0	0	0	0	0	0	0	0	0	0.00609756	0.134146	0.00609756	0.0731707	0.00609756
0	0.0177215	0.00337553	0	0.000562588	0.00253165	0.00393812	0.00421941	0	0.0537271	0.00309423	0.0157525	0.0185654	0.0129395	0.00112518	0.000281294	0.000281294	0.00815752	0.00731364	0	0.000843882	0.000562588	0.000843882	0.00872011	0	0	0	0.0295359	0.00337553	0.00365682	0.00253165	0.00506329	0.00900141	0	0.0112518	0.0140647	0.0427567	0.0728551	0.126864	0.177215	0.337271
2	0.00125523	0.00041841	0	0	0	0.00041841	0.00041841	0	0.0903766	0.138075	0.00125523	0.00209205	0.00209205	0.00460251	0	0	0.00083682	0.00041841	0	0.00041841	0.00083682	0.0133891	0.0041841	0	0	0	0.0108787	0.00041841	0	0.00125523	0.00041841	0.00083682	0.00083682	0.00041841	0.328033	0.025523	0.051046	0.0196653	0.00334728	0.296234
3	0.0147971	0.000954654	0	0	0.000477327	0.00477327	0.000477327	0.000477327	0.0830549	0.00811456	0.0114558	0.0124105	0.0157518	0.000954654	0.000477327	0	0.0114558	0.00286396	0	0.000477327	0	0.00143198	0.00286396	0	0.000477327	0	0.0529833	0.00143198	0.00906921	0.00143198	0.0186158	0.00811456	0.000477327	0.00429594	0.0563246	0.0348449	0.026253	0.0682578	0.0377088	0.506444
4	0.100886	0	0.00688976	0.0211614	0	0.0152559	0.0019685	0	0.0310039	0.00393701	0.00246063	0.000984252	0.000984252	0.015748	0	0.00147638	0.00541339	0.0142717	0	0	0.00492126	0.00147638	0.0019685	0	0	0.000492126	0.0019685	0.00885827	0	0	0.00246063	0	0	0.000984252	0.00935039	0.00442913	0.466043	0.0152559	0.206693	0.0526575
6	0.00110619	0.00387168	0.000553097	0.00331858	0.00110619	0.00276549	0.00165929	0	0.00663717	0.000553097	0.00442478	0.00442478	0.011615	0.132743	0	0	0.00829646	0.000553097	0	0	0.000553097	0.00221239	0.00221239	0	0.000553097	0.000553097	0.00221239	0.00165929	0.00110619	0.00608407	0.00221239	0.00165929	0.00110619	0.00331858	0.00221239	0.028208	0.147124	0.39104	0.0896018	0.132743
8	0.068799	0.0030175	0	0.0006035	0.001207	0.008449	0.022933	0.0006035	0.019312	0.006035	0.0307785	0.0802655	0.007242	0.0006035	0.0006035	0	0.0054315	0.0030175	0	0	0	0	0.0042245	0	0	0	0.0368135	0.006035	0.0066385	0.0042245	0.010863	0.013277	0.003621	0.019312	0.021726	0.0645745	0.03621	0.0935425	0.182257	0.237779
11	0.125952	0.00138408	0	0	0.000692042	0.00346021	0.000692042	0	0.0816609	0.00138408	0.00276817	0.00346021	0.00692042	0.00553633	0	0.000692042	0.00415225	0.0484429	0	0	0	0.000692042	0.0083045	0	0	0	0.0103806	0.00207612	0	0.000692042	0.0103806	0.000692042	0.000692042	0.00346021	0.0775087	0.00968858	0.0851211	0.0117647	0.333564	0.157785
13	0.0306268	0.00213675	0.000712251	0.000712251	0.0042735	0.017094	0.0206553	0	0.0441595	0.00641026	0.0334758	0.0498575	0.0235043	0.00498575	0.0014245	0	0.011396	0.00498575	0	0.00498575	0.000712251	0.0014245	0.002849	0	0.000712251	0.00569801	0.0163818	0.000712251	0.0014245	0.0349003	0.0135328	0.00783476	0.00356125	0.00213675	0.0163818	0.0968661	0.014245	0.149573	0.100427	0.269231
21	0.00993677	0.0117435	0	0	0.000903342	0.00271003	0.00722674	0.00180668	0.0542005	0.0189702	0.00271003	0.0180668	0.00271003	0.00542005	0.00271003	0.000903342	0.00722674	0.000903342	0	0.000903342	0.00271003	0	0.0225836	0	0	0.000903342	0.0126468	0.00271003	0.00361337	0.0252936	0.00361337	0.00271003	0.0207769	0.00361337	0.0171635	0.037037	0.0325203	0.266486	0.126468	0.270099
23	0.00407747	0.00101937	0	0	0	0.019368	0.00407747	0	0.0244648	0.00101937	0.00509684	0.00101937	0.0030581	0.00203874	0	0	0.0336391	0.00203874	0	0	0.00101937	0	0.0122324	0	0	0	0.0030581	0.0030581	0	0.0030581	0	0	0	0.00917431	0.00203874	0.00407747	0.203874	0.0295617	0.571865	0.0560652
25	0.00438116	0	0	0	0.00766703	0.00109529	0.00876232	0	0.00219058	0.00109529	0.0153341	0.0383352	0.0668127	0	0	0	0.00109529	0	0	0	0	0	0.00109529	0.00109529	0	0	0.0109529	0.00328587	0.00985761	0.00657174	0.00328587	0.0514786	0.00109529	0.00328587	0.00109529	0.0558598	0	0.35816	0.0109529	0.335159
28	0.015873	0.00132275	0	0.00132275	0	0.00132275	0	0	0.0145503	0.00132275	0.00529101	0.00925926	0.0026455	0	0	0	0.0145503	0	0	0.00132275	0	0	0.00529101	0	0	0	0.00661376	0.0291005	0.0026455	0	0.00132275	0	0.00132275	0.0820106	0	0.0251323	0.0515873	0.026455	0.563492	0.136243
35	0.0115163	0.00191939	0.00191939	0	0.0191939	0.00575816	0.0153551	0	0.0115163	0.00767754	0.059501	0.12476	0.0134357	0.049904	0.0115163	0.00383877	0.0211132	0.00575816	0	0	0	0	0	0	0	0.00383877	0.0153551	0.00575816	0.00191939	0.0230326	0.00383877	0.00767754	0	0.0230326	0.00575816	0.0230326	0.084453	0.049904	0.074856	0.31286
36	0.0327553	0	0	0	0	0.00192678	0	0.00385356	0.088632	0.00192678	0	0.0558767	0.0231214	0	0	0	0	0.044316	0	0.00192678	0	0.00770713	0	0	0	0	0.00192678	0	0	0	0.0558767	0	0	0	0.585742	0.00192678	0.017341	0	0	0.0751445
40	0	0	0	0	0	0.00384615	0	0	0.0423077	0.00384615	0.00384615	0.296154	0.292308	0	0	0	0.00384615	0.0461538	0	0	0	0	0.00384615	0	0	0	0	0	0.00384615	0	0.0230769	0	0	0	0.0153846	0.00384615	0.0461538	0.00769231	0.00384615	0.2
47	0.00995025	0	0	0	0	0	0	0	0.00995025	0	0.00497512	0	0.00497512	0	0	0	0	0	0	0	0	0	0	0	0.0497512	0	0	0	0.00497512	0.00497512	0	0.0895522	0	0	0.00497512	0.0298507	0.00497512	0.258706	0	0.522388
	e10:Glut/Meis2	e11:Glut/Shox2	e4:Trh/Angpt1	e13:Ghrh/C1ql1	e7:Reln/C1ql1	e2:Tac1/Fezf1	e9:Glut/Tcf7l2	e8:Cck/Ebf3	e6:Nos1/Trp73	e21:Glut/Rxpf3	e22:Gal/Ucn3	e5:Adcyap1/Nkx2.1	e3:Cartpt/Isl1	e23:Reln/Etv1	e20:Crh	e1:Glut	e19:Ghrh/Trh	e17:Th/Adcyap1	e16:Sst/Cartpt	e15:Ucn3/Brs3	e12:Nos1/Foxp2
1	0.317719	0.000814664	0	0	0.0162933	0.0179226	0.095723	0.000814664	0.331976	0.00488798	0	0.00203666	0.00285132	0.001222	0.0130346	0.165377	0	0	0.000407332	0.0179226	0.010998
10	0	0.989662	0	0	0.00827016	0	0.00137836	0	0	0	0	0	0	0	0	0.00068918	0	0	0	0	0
14	0	0.991215	0	0	0.00292826	0.000732064	0.000732064	0	0	0	0	0	0.00146413	0	0.000732064	0.00146413	0	0	0	0	0.000732064
18	0	0.927827	0.000801925	0	0.0328789	0.00400962	0	0	0	0	0	0	0	0	0.00561347	0.0288693	0	0	0	0	0
24	0	0.946993	0	0	0.0397554	0	0.00101937	0.0030581	0.00101937	0	0	0	0.00203874	0	0	0.00611621	0	0	0	0	0
42	0	0.816327	0	0	0.126531	0	0.0204082	0.00408163	0	0	0	0	0.00816327	0	0	0.0244898	0	0	0	0	0
16	0.0109461	0.000781861	0.519156	0.000781861	0.0523847	0.0664582	0	0	0.0132916	0.0172009	0.0039093	0.0242377	0.00547303	0	0.028147	0.0836591	0.105551	0.0570758	0.00156372	0.00469116	0.00469116
26	0.00250941	0	0.00250941	0.183187	0.410289	0.00752823	0	0	0.02133	0.00501882	0.00125471	0.00501882	0.00376412	0	0.0464241	0.175659	0	0	0.00125471	0.0815558	0.0526976
27	0.0012987	0	0.00909091	0	0.00519481	0.853247	0	0	0.0038961	0.0220779	0.0012987	0.00519481	0	0	0.0155844	0.074026	0	0	0.0025974	0	0.00649351
33	0.0873016	0.0031746	0	0	0.0126984	0.0222222	0.55873	0	0.0396825	0.0047619	0	0.031746	0.00793651	0	0.0126984	0.209524	0	0	0	0	0.00952381
37	0	0.00210084	0.00210084	0	0	0.0546218	0	0.903361	0.00630252	0.00210084	0	0	0	0	0	0.0273109	0	0	0	0	0.00210084
39	0.00917431	0.00688073	0	0	0.00917431	0.016055	0	0.763761	0.0756881	0.00229358	0	0	0	0	0.00458716	0.112385	0	0	0	0	0
48	0.015	0	0	0	0	0.14	0.005	0.36	0.07	0	0	0.015	0	0	0.02	0.27	0	0	0	0	0.105
52	0	0	0	0	0	0	0	1	0	0	0	0	0	0	0	0	0	0	0	0	0
44	0	0	0	0	0	0	0	0	0.982301	0.00442478	0	0	0	0	0	0.0132743	0	0	0	0	0
45	0.00473934	0	0.0805687	0	0.014218	0.236967	0	0	0	0.464455	0	0	0.00947867	0	0.0236967	0.156398	0	0.00473934	0	0	0.00473934
51	0	0	0.0747664	0	0	0.130841	0	0	0	0	0.64486	0	0	0	0.0841121	0.046729	0.0186916	0	0	0	0
7	0.00230415	0.000576037	0.0167051	0	0.0144009	0.436636	0	0	0.110023	0.0247696	0	0.00921659	0.0299539	0	0.0881336	0.243664	0.00115207	0.00115207	0.00864055	0.00518433	0.00748848
19	0.00570497	0.000814996	0	0.000814996	0.00407498	0.0187449	0	0	0.00570497	0.0114099	0	0.125509	0.115729	0	0.0285249	0.621027	0	0	0	0.0114099	0.0505297
