# Supplementary material for: Cellular evolution of the hypothalamic preoptic area of behaviorally divergent deer mice
Source: eLife. 2025 Apr 7;13:RP103109. doi: 10.7554/eLife.103109 (PMC11975375; doi:10.7554/eLife.103109)
Supplement: Figure 1—figure supplement 9—source data 1. [file elife-103109-fig1-figsupp9-data1.xlsx]

## Sheet: Sheet1
Figure 1 - figure supplement 9 - source data 4
Peromyscus cell cluster	Median number of reads	Median number of genes
0	2456	1696
1	3975	2425
2	3825	2355.5
3	4148	2488
4	3394.5	2154
5	3841.5	2377.5
6	2690	1815.5
7	3531.5	2237
8	3966	2398
9	3046	1970
10	4055	2477
11	4110	2475
12	3019.5	1986
13	2260	1530.5
14	3464	2195
15	2564	1707.5
16	3475	2196
17	3414	2177
18	3671	2280
19	3898	2395
20	2863	1877
21	3885	2355
22	3609.5	2239.5
23	2968	1956
24	3560	2239
25	2951	1911
26	3474	2200
27	3728.5	2307
28	3709.5	2300.5
29	2913	1882
30	4218	2551
31	3500	2210
32	3578	2242
33	4146	2488
34	3440	2076
35	3662	2260
36	3980	2440
37	2910	1850.5
38	2722	1816
39	2481.5	1661.5
40	3412.5	2151
41	2770	1787
42	3641	2319
43	2267	1573
44	4198	2468.5
45	4088	2480
46	2516	1695
47	3967	2408
48	2859	1880
49	4432	2662
50	3488	2172
51	3310	2107
52	4034	2311
