# Supplementary material for: Cellular evolution of the hypothalamic preoptic area of behaviorally divergent deer mice
Source: eLife. 2025 Apr 7;13:RP103109. doi: 10.7554/eLife.103109 (PMC11975375; doi:10.7554/eLife.103109)
Supplement: Figure 2—source data 1. [file elife-103109-fig2-data1.xlsx]

## Sheet: Sheet1
Figure 2B - source data 1
	Differential abundance across species					Differential abundance across sexes
Cell cluster	log2FC (P. pol / P. man)	logCPM	F	PValue	fdr	log2FC (male / female)	logCPM	F	PValue	fdr
0	-0.253615	15.989	1.01903	0.324583	1	0.562542	15.989	5.19045	0.0336158	1
1	0.246615	15.4575	3.38335	0.0804698	1	-0.0660823	15.4575	0.245294	0.625705	1
2	0.452976	15.5026	3.91128	0.0616413	1	0.248977	15.5026	1.21461	0.283264	1
3	0.275669	15.1823	1.5009	0.234501	1	-0.273686	15.1823	1.4786	0.237889	1
4	0.303554	15.206	2.30185	0.144576	1	0.0929929	15.206	0.218715	0.644982	1
5	0.0917894	15.1893	0.223542	0.641378	1	0.598764	15.1893	9.81578	0.00515281	0.267946
6	0.492225	15.1567	1.44325	0.243387	1	0.667666	15.1567	2.78846	0.110231	1
7	-0.0281988	14.9356	0.0148751	0.904122	1	0.141464	14.9356	0.393548	0.537405	1
8	0.0968803	15.9388	0.0490104	0.826997	1	0.266139	15.9388	0.328105	0.573042	1
9	-0.0182225	15.0407	0.0108142	0.918193	1	0.829798	15.0407	22.3207	0.000123875	0.00656538
10	0.467426	14.7972	0.817287	0.376535	1	0.368873	14.7972	0.586912	0.452396	1
11	0.167566	14.7019	0.514153	0.481483	1	0.148721	14.7019	0.402285	0.532965	1
12	0.454562	14.785	0.779394	0.38762	1	0.00964156	14.785	0.000313322	0.98605	1
13	-0.197206	14.7594	0.725826	0.404138	1	-0.0829304	14.7594	0.13185	0.72026	1
14	-0.0916271	14.7338	0.0483421	0.828161	1	0.018855	14.7338	0.00242862	0.961175	1
15	-0.107241	14.75	0.452996	0.508475	1	-0.129958	14.75	0.671194	0.422111	1
16	-0.0223605	14.6026	0.0218947	0.883821	1	-0.260793	14.6026	2.96472	0.100241	1
17	-0.261464	14.6061	1.7844	0.196333	1	0.101886	14.6061	0.279934	0.602459	1
18	-0.136209	14.5367	0.317435	0.579299	1	0.00190148	14.5367	7.66906e-05	0.993098	1
19	0.0104218	14.417	0.0020924	0.96396	1	-0.351559	14.417	2.13361	0.159344	1
20	0.758916	14.4092	18.1455	0.000369486	0.0195827	-0.117045	14.4092	0.442519	0.513366	1
21	-0.2093	14.3687	1.13624	0.298911	1	-0.158588	14.3687	0.643089	0.431844	1
22	-0.0173018	14.3042	0.00439377	0.947796	1	0.254337	14.3042	0.972322	0.335662	1
23	0.0683655	14.2849	0.150561	0.702022	1	0.277569	14.2849	2.42296	0.134959	1
24	-0.178376	14.3103	0.0441283	0.835701	1	0.128006	14.3103	0.0286827	0.867183	1
25	-0.239447	14.0241	1.11015	0.304378	1	-0.0633353	14.0241	0.0787562	0.781819	1
26	-0.212217	13.9921	1.49045	0.236081	1	0.246838	13.9921	2.04989	0.167372	1
27	-0.269931	13.8944	2.74174	0.113073	1	-0.332183	13.8944	4.17008	0.0542956	1
28	0.251673	13.8062	1.19019	0.28802	1	0.00266532	13.8062	8.49117e-05	0.992737	1
29	-0.575489	13.8008	4.95689	0.0374137	1	-0.353108	13.8008	1.8816	0.185063	1
30	0.222801	13.7959	0.637914	0.433675	1	0.344916	13.7959	1.47879	0.237859	1
31	-0.143406	13.6707	0.402775	0.532718	1	-0.0415005	13.6707	0.0340042	0.85552	1
32	0.3531	13.5685	1.0119	0.32624	1	0.343395	13.5685	0.984707	0.332674	1
33	0.250257	13.6089	1.31836	0.264183	1	0.288664	13.6089	1.74964	0.20057	1
34	-0.680715	13.4183	10.7062	0.00374408	0.187204	0.181684	13.4183	0.765074	0.412234	1
35	-0.258659	13.3313	0.519082	0.479415	1	0.185928	13.3313	0.280891	0.601844	1
36	-0.105571	13.3071	0.115429	0.737521	1	0.0407153	13.3071	0.0177135	0.895426	1
37	-0.0744674	13.3798	0.115815	0.7371	1	-0.0768301	13.3798	0.125139	0.727159	1
38	0.133815	13.3901	0.131692	0.72042	1	-0.027065	13.3901	0.00514007	0.943544	1
39	-0.629222	13.2177	1.89996	0.183025	1	0.31	13.2177	0.488898	0.492321	1
40	-0.714848	12.473	12.9711	0.00174012	0.0887462	-0.282945	12.473	2.07031	0.16537	1
41	0.679007	12.5243	4.72086	0.041753	1	-0.244462	12.5243	0.619691	0.440219	1
42	-0.0430247	12.4844	0.0027445	0.958817	1	-0.259539	12.4844	0.133046	0.719694	1
43	2.38091	12.4411	13.3036	0.00156284	0.0812675	-0.966974	12.4411	2.44434	0.133342	1
44	-0.0150355	12.3148	0.00599337	0.939047	1	0.0532142	12.3148	0.0723087	0.906047	1
45	-0.154383	12.2037	0.286983	0.597958	1	0.220716	12.2037	0.587328	0.452239	1
46	0.415332	12.3642	1.96088	0.176457	1	-0.139644	12.3642	0.232719	0.634654	1
47	-0.090254	12.1379	0.0802015	0.779881	1	0.44981	12.1379	2.05107	0.167255	1
48	0.138398	12.321	0.0889865	0.768489	1	0.113867	12.321	0.0619491	0.805932	1
49	0.442477	12.0114	1.5847	0.222311	1	-0.135276	12.0114	0.148514	0.703951	1
50	0.205653	12.0311	0.434772	0.517037	1	-0.164462	12.0311	0.271781	0.607757	1
51	0.0801144	11.4952	0.035242	0.852946	1	-0.845834	11.4952	3.90753	0.0617556	1
52	0.330432	10.7452	0.532454	0.473879	1	0.0501743	10.7452	0.011297	0.921993	1
