# Supplementary material for: Cellular evolution of the hypothalamic preoptic area of behaviorally divergent deer mice
Source: eLife. 2025 Apr 7;13:RP103109. doi: 10.7554/eLife.103109 (PMC11975375; doi:10.7554/eLife.103109)
Supplement: Figure 3—source data 1. [file elife-103109-fig3-data1.xlsx]

## Sheet: Sheet1
Figure 3B - source data 1
AVP+ counts
species	sex	region
		AHA	BNST	PVN	SON
P. maniculatus	F	55	55	369	893
P. maniculatus	F	71	64	365	791
P. maniculatus	F	97	21	333	1075
P. maniculatus	F	105	63	291	692
P. maniculatus	F	87	49	250	715
P. maniculatus	M	86	64	347	1187
P. maniculatus	M	61	133	492	992
P. maniculatus	M	79	47	265	738
P. maniculatus	M	110	32	271	858
P. maniculatus	M	55	34	322	906
P. maniculatus	M	35	47	463	832
P. polionotus	F	66	83	260	548
P. polionotus	F	54	55	202	414
P. polionotus	F	68	45	247	513
P. polionotus	F	8	71	159	280
P. polionotus	F	11	22	166	229
P. polionotus	M	80	120	285	506
P. polionotus	M	91	47	207	524
P. polionotus	M	53	10	243	511
P. polionotus	M	70	42	232	148
