# Supplementary material for: Cellular evolution of the hypothalamic preoptic area of behaviorally divergent deer mice
Source: eLife. 2025 Apr 7;13:RP103109. doi: 10.7554/eLife.103109 (PMC11975375; doi:10.7554/eLife.103109)
Supplement: Figure 3—source data 2. [file elife-103109-fig3-data2.xlsx]

## Sheet: Sheet1
Figure 3D - source data 2
OXT+ counts
species	sex	region
		AHA	BNST	PVN	SON
P. maniculatus	F	0	0	326	235
P. maniculatus	F	0	0	283	221
P. maniculatus	F	3	1	489	538
P. maniculatus	F	0	0	301	316
P. maniculatus	F	0	0	384	237
P. maniculatus	M	0	0	381	272
P. maniculatus	M	0	0	433	344
P. maniculatus	M	4	0	382	334
P. maniculatus	M	0	0	403	479
P. maniculatus	M	0	0	361	373
P. maniculatus	M	9	1	490	446
P. polionotus	F	0	0	182	114
P. polionotus	F	0	0	164	113
P. polionotus	F	0	0	97	4
P. polionotus	F	0	0	45	6
P. polionotus	F	0	0	121	27
P. polionotus	M	0	0	203	105
P. polionotus	M	0	1	170	102
P. polionotus	M	0	0	260	138
P. polionotus	M	0	0	64	25
P. polionotus	M	0	0	142	105
