# Supplementary material for: Cellular evolution of the hypothalamic preoptic area of behaviorally divergent deer mice
Source: eLife. 2025 Apr 7;13:RP103109. doi: 10.7554/eLife.103109 (PMC11975375; doi:10.7554/eLife.103109)
Supplement: Figure 3—source data 3. [file elife-103109-fig3-data3.xlsx]

## Sheet: Sheet1
Figure 3F - source data 3
species	sex	CALB1+ size (BNST)	CALB1+ counts (SDN-POA)
P. maniculatus	F	77.6	664
P. maniculatus	F	34.24	227
P. maniculatus	F	56.74	590
P. maniculatus	F	75.599	605
P. maniculatus	F	10.588	254
P. maniculatus	M	149.24	1016
P. maniculatus	M	159.276	889
P. maniculatus	M	163.37	925
P. maniculatus	M	166.013	543
P. maniculatus	M	175.996	792
P. polionotus	F	-	500
P. polionotus	F	89.37	589
P. polionotus	F	93.077	257
P. polionotus	F	100.45	411
P. polionotus	F	67.806	198
P. polionotus	F	75.203	357
P. polionotus	M	-	523
P. polionotus	M	251.15	357
P. polionotus	M	189.335	792
P. polionotus	M	81.98	480
P. polionotus	M	145.067	498
P. polionotus	M	176.217	381
