# Supplementary material for: Cellular evolution of the hypothalamic preoptic area of behaviorally divergent deer mice
Source: eLife. 2025 Apr 7;13:RP103109. doi: 10.7554/eLife.103109 (PMC11975375; doi:10.7554/eLife.103109)
Supplement: Figure 5—figure supplement 2—source data 1. [file elife-103109-fig5-figsupp2-data1.xlsx]

## Sheet: Sheet1
Figure 5 - figure supplement 2 - source data 1
	SPECIES	P. maniculatus											P. polionotus
	SEX	F	F	F	F	F	F	M	M	M	M	M	M	F	F	F	F	F	F	M	M	M	M	M	M
Cluster 5	Esr1	6.65781	5.97718	6.87357	6.45633	6.53357	6.56956	6.50724	5.98968	6.75375	5.74225	6.2189	4.62406	7.54016	8.10228	7.24747	7.19721	6.78334	6.32655	6.99311	7.19607	6.54341	6.68897	6.6725	6.49221
	Ar	7.14324	7.14711	7.1366	7.15148	6.7815	7.45091	6.33731	7.13652	7.18671	7.09372	6.98074	7.72839	8.08448	7.3076	6.86281	6.47138	7.22391	6.78599	7.67118	7.46525	7.03937	7.30195	6.36764	7.31533
	Prlr	7.50581	6.29911	7.8471	7.76446	7.57797	7.344	8.03775	6.82618	7.67975	7.62574	7.55331	7.38959	6.76256	7.21645	6.44777	6.81534	5.78334	5.64848	7.29567	7.55452	7.0909	6.6604	6.6725	7.18409
	Pgr	7.65781	7.43661	7.20073	7.23394	7.66285	7.10299	7.98117	7.22672	7.85809	7.25931	6.98074	7.38959	8.41463	7.82217	6.78035	7.4148	7.22391	6.91152	8.33414	7.66555	7.59786	7.24536	6.98062	7.74597
Cluster 9	Esr1	6.13256	6.56753	6.1171	5.12021	4.96537	4.60158	5.08933	6.34846	5.97053	4.856	5.43539	4.80639	6.86416	7.47023	7.01695	6.17458	6.50725	5.46304	6.55233	6.21445	6.82275	5.66357	6.38777	5.89561
	Ar	6.28456	7.24561	6.83331	6.95671	5.96537	6.60158	7.56326	7.48596	6.38557	6.5405	7.02035	6.71328	5.95727	7.54823	6.20959	6.71515	6.21774	4.87808	7.02877	6.95141	6.89675	6.71088	7.38777	6.57368
	Prlr	7.13256	7.05296	6.89471	7.56078	7.18777	7.18654	7.31172	7.41885	7.24355	7.44096	7.65778	7.19871	7.20519	7.47023	7.45752	6.96308	6.63278	5.87808	7.19869	7.50395	7.48171	6.96613	7.06584	7.93123
	Pgr	6.42206	6.83057	6.30974	5.63478	6.55034	5.82397	6.56326	6.34846	6.29246	6.74909	6.02035	5.80639	6.4167	5.62223	6.37952	5.03708	5.63278	5.46304	6.93566	6.50395	7.18953	6.34164	5.6508	6.15864
