# Supplementary material for: Cellular evolution of the hypothalamic preoptic area of behaviorally divergent deer mice
Source: eLife. 2025 Apr 7;13:RP103109. doi: 10.7554/eLife.103109 (PMC11975375; doi:10.7554/eLife.103109)
Supplement: Supplementary file 1. [file elife-103109-supp1.xlsx]

## Sheet: Sheet1
Supplementary File 1. 10x sequencing statistics
Replicate	Number of nuclei	Median UMI counts / cell	Median genes / cell	Sequencing system
rep01	9913	1860	1348	NovaSeq S1-100
rep02	16763	1623	1256	NovaSeq S4-200 flowcell
rep03	19984	2030	1495	NovaSeq S4-200 flowcell
rep04	21434	2320	1663	NovaSeq S4-200 flowcell
rep05	19422	1902	1400	NovaSeq S4-200 flowcell
rep06	18131	1507	1117	NovaSeq S4-200 flowcell
