# Supplementary material for: Cellular evolution of the hypothalamic preoptic area of behaviorally divergent deer mice
Source: eLife. 2025 Apr 7;13:RP103109. doi: 10.7554/eLife.103109 (PMC11975375; doi:10.7554/eLife.103109)
Supplement: Supplementary file 2. [file elife-103109-supp2.xlsx]

## Sheet: Sheet1
Supplementary File 2. Cell abundance of all clusters across all replicates
Sample	Replicate	4	18	11	39	0	29	12	42	14	34	6	49	5	1	40	22	10	26	2	28	21	9	13	24	35	44	27	33	3	38	36	15	7	17	30	16	43	48	19	31	41	50	52	20	51	32	23	25
P. maniculatus female	rep01	15.0773	28.4794	3.35051	11.7268	10.0515	23.4536	30.1546	0	31.8299	10.0515	3.35051	3.35051	20.1031	21.7783	6.70103	20.1031	6.70103	26.8041	23.4536	5.02577	10.0515	73.7113	10.0515	0	6.70103	3.35051	26.8041	3.35051	5.02577	63.6597	6.70103	110.567	6.70103	46.9072	6.70103	46.9072	1.67526	5.02577	6.70103	11.7268	16.7526	10.0515	0	18.4278	1.67526	0	36.8556	5.02577
	rep02	56.8787	51.8103	10.1368	20.8368	163.878	14.6421	56.3156	20.8368	75.4629	12.3894	86.726	2.81578	13.5157	48.9946	3.94209	30.9736	71.5208	19.7105	88.9786	4.50525	18.5841	14.0789	9.01049	55.1893	14.0789	4.50525	16.3315	12.3894	16.3315	13.5157	1.68947	19.7105	23.6525	10.1368	24.7789	20.8368	1.68947	7.88418	2.25262	5.63156	2.81578	3.37893	1.12631	5.63156	1.68947	1.12631	7.88418	4.50525
	rep03	22.7838	4.60796	31.7437	0.511996	47.1036	19.4558	0	0	0.511996	13.8239	6.91194	1.27999	35.8397	44.5436	8.70392	5.11996	0	12.0319	8.95992	12.7999	18.4318	19.9678	7.67993	0	6.14395	4.35196	14.3359	5.63195	45.8236	1.53599	11.0079	22.0158	48.1276	26.6238	4.86396	28.9277	0	0.255998	37.3757	16.3839	3.07197	2.04798	0.255998	21.7598	3.32797	18.1758	12.0319	22.0158
	rep04	32.6455	17.4273	26.5092	0.98182	36.8183	14.9728	1.96364	0	5.40001	13.2546	4.41819	1.22728	29.7001	51.0547	4.9091	9.32729	7.1182	11.0455	20.3728	15.4637	21.1091	16.6909	13.0091	0	19.391	4.9091	16.2	8.83638	57.682	4.17274	11.2909	26.5092	39.5183	23.0728	9.32729	24.791	0.245455	0.98182	33.6274	11.0455	2.70001	3.68183	0.736365	17.6728	2.45455	13.7455	14.4819	17.6728
	rep05	39.6302	25.2192	18.0137	24.7688	46.3853	13.9606	68.0018	14.411	60.7963	7.20548	48.637	9.00685	22.0668	35.5771	4.50343	33.7757	88.2672	13.5103	49.0874	11.7089	21.6165	15.762	19.8151	55.3922	2.70206	3.1524	8.10617	10.8082	22.0668	20.7158	8.10617	16.2123	22.0668	20.2654	19.8151	15.3117	10.8082	10.3579	17.113	9.4572	2.70206	2.25171	0.450343	7.65583	1.80137	3.60274	12.1593	16.6627
	rep06	19.0547	29.3895	27.1288	0.645924	26.4829	19.7007	5.49035	0	13.2414	8.71997	3.55258	1.93777	35.8488	41.6621	7.10516	7.10516	12.2725	10.0118	36.4947	16.794	47.7983	27.7747	62.9776	0.322962	3.55258	3.22962	19.3777	6.7822	63.3005	1.29185	7.10516	20.9925	35.5258	24.8681	2.58369	34.8799	0.322962	2.26073	36.1717	17.4399	2.58369	0.968885	0.645924	22.2844	2.58369	12.5955	18.0859	17.4399
P. maniculatus male	rep01	3.24623	9.73869	25.9698	12.9849	6.49246	0	3.24623	1.62311	38.9548	14.608	17.8543	0	40.5779	19.4774	4.86934	9.73869	16.2311	40.5779	53.5628	6.49246	30.8392	141.211	6.49246	21.1005	8.11557	3.24623	21.1005	9.73869	11.3618	21.1005	1.62311	50.3166	4.86934	40.5779	4.86934	30.8392	0	25.9698	3.24623	12.9849	6.49246	8.11557	1.62311	16.2311	0	0	37.3316	4.86934
	rep02	60.3811	27.5879	24.9853	24.9853	226.95	10.9311	49.9705	7.28737	43.7242	14.5747	106.708	4.16421	39.0395	43.2037	7.28737	30.1905	56.7374	21.8621	65.0658	5.20527	14.5747	28.629	6.24632	32.2726	10.9311	6.76685	11.9721	19.2595	15.6158	8.32842	7.8079	16.1363	35.3958	14.0542	18.2184	18.2184	0	5.20527	6.24632	6.76685	2.08211	1.04105	1.04105	6.24632	0	3.64369	26.0263	7.28737
	rep03	29.9782	17.2951	23.3484	0.576504	113.283	16.4304	3.45902	0	9.80056	12.9713	16.1421	2.01776	53.9031	41.7965	6.34154	11.2418	1.15301	14.1243	21.6189	13.8361	10.9536	23.0602	7.2063	0.288252	20.1776	3.17077	14.7008	11.8183	38.914	3.17077	14.7008	21.3306	47.8498	31.996	9.80056	20.1776	0.576504	1.72951	22.7719	15.2774	1.72951	2.01776	0.576504	18.4481	2.59427	17.0069	21.3306	22.1954
	rep04	31.8188	24.9248	31.0234	1.59094	39.5084	19.8868	11.6669	0	13.2578	8.48502	9.54565	1.32578	40.0387	37.9174	3.97735	14.3185	8.21987	14.0533	27.8415	21.7429	19.8868	44.5464	11.4017	0	7.68955	3.97735	16.7049	7.68955	31.8188	6.36377	12.7275	18.0307	26.2505	29.1673	7.42439	22.008	0	1.32578	31.2885	13.2578	4.24251	2.38641	0.265157	16.97	2.65157	18.2958	21.7429	23.8641
	rep05	45.2389	25.5859	27.44	22.9902	76.7577	9.27026	37.4518	10.0119	50.801	12.9784	45.2389	5.93296	37.4518	34.4854	4.44972	35.227	48.5761	12.2367	45.6097	9.64107	15.9448	22.2486	15.2032	45.9805	4.07891	4.44972	10.7535	14.4616	25.2151	10.0119	7.4162	21.507	25.2151	17.0573	22.9902	15.574	5.56215	3.33729	12.2367	9.64107	0.74162	1.11243	0.74162	12.9784	0.37081	7.78702	12.9784	17.7989
	rep06	38.4709	29.3341	12.0222	16.3501	58.1873	17.3119	54.3402	8.65596	35.5856	11.5413	70.6903	0.961773	33.1812	39.9136	3.84709	39.4327	48.5695	18.2737	56.7446	8.17507	22.6017	28.8532	137.053	41.8371	12.9839	2.40443	10.0986	12.0222	25.9679	6.73241	11.0604	19.7164	30.2959	25.9679	16.831	13.4648	2.88532	1.44266	19.2355	12.5031	5.28975	5.28975	0.961773	14.4266	0	5.77064	10.5795	18.2737
P. polionotus female	rep01	33.1004	13.7918	22.0669	1.37918	19.3085	8.27509	2.75836	0	6.89591	1.37918	24.8253	2.75836	52.4089	37.2379	5.51673	13.7918	4.13754	15.171	44.1338	9.65427	15.171	71.7174	8.27509	1.37918	12.4126	1.37918	19.3085	9.65427	19.3085	9.65427	9.65427	56.5464	19.3085	56.5464	8.27509	33.1004	4.13754	17.9294	6.89591	19.3085	12.4126	8.27509	0	24.8253	6.89591	8.27509	44.1338	0
	rep02	46.9712	16.8062	26.7176	2.58557	92.6496	11.2041	24.5629	0.430929	11.6351	8.61857	37.0599	2.15464	40.5073	32.3196	4.30929	13.7897	15.0825	11.2041	33.6124	13.7897	19.8227	17.6681	3.0165	0.861857	4.74021	3.87836	16.8062	9.0495	32.3196	7.75671	8.18764	28.0104	27.1485	18.5299	9.0495	24.132	18.099	0	17.6681	12.9279	6.89486	3.44743	0.861857	22.8392	1.29279	4.30929	12.066	12.4969
	rep03	30.1639	15.539	31.3827	0	24.9843	12.1874	17.6718	0	9.74996	8.8359	6.39841	3.96092	26.5077	49.3592	3.35155	16.7577	7.00778	11.8828	32.2967	10.9687	10.664	12.1874	7.00778	0	6.7031	3.65623	13.1015	15.2343	38.3905	6.09372	16.4531	20.414	28.0311	23.7655	14.6249	20.1093	10.9687	0.304686	26.5077	14.0156	4.57029	3.04686	0	32.6014	2.1328	20.1093	15.2343	22.8515
	rep04	40.8922	26.9517	30.0496	0.929369	20.4461	9.29369	9.60348	0.929369	25.093	6.19579	21.0657	3.40769	23.8538	51.1153	4.95664	13.0112	21.6853	11.4622	43.0608	17.0384	20.4461	15.1797	6.81537	2.47832	6.81537	3.71748	13.6307	11.772	48.3272	6.19579	11.1524	21.3755	21.3755	23.544	11.4622	18.8972	6.81537	1.85874	22.3049	10.8426	6.50558	3.71748	0.619579	26.6419	1.54895	14.8699	15.7993	21.0657
	rep05	35.3103	20.2446	20.7154	23.5402	50.3761	10.8285	51.7885	20.2446	55.5549	7.06207	61.2046	2.35402	17.4198	46.6097	2.82483	25.4234	48.4929	11.2993	81.92	11.7701	18.8322	21.1862	25.4234	56.0257	11.7701	4.70805	14.5949	16.4782	33.8979	10.3577	3.76644	17.4198	25.8943	8.00368	14.5949	17.8906	2.35402	8.94529	12.2409	1.88322	5.17885	1.41241	1.88322	22.1278	2.35402	4.23724	16.4782	9.8869
	rep06	35.1348	26.7977	16.0786	19.0561	44.6628	12.5056	63.1235	10.1236	53.5954	8.33706	54.7864	3.57303	20.2471	50.0224	2.38202	20.8427	57.1684	20.2471	57.1684	7.14605	20.8427	16.0786	132.797	75.0335	7.14605	4.16853	10.1236	8.33706	34.5393	10.7191	4.76403	12.5056	21.4382	8.33706	7.74156	26.7977	7.14605	7.74156	20.2471	11.3146	2.38202	2.97752	2.38202	20.8427	0.595504	2.97752	14.2921	16.6741
P. polionotus male	rep01	25.0908	12.5454	29.916	4.82516	26.0559	9.65032	14.4755	0	12.5454	1.93006	82.9928	0	63.6921	42.4614	3.86013	11.5804	15.4405	17.3706	28.951	16.4055	17.3706	84.9228	2.8951	0	7.72026	4.82516	11.5804	2.8951	29.916	10.6154	6.75522	76.2375	35.7062	35.7062	7.72026	32.8111	0.965032	2.8951	9.65032	14.4755	20.2657	7.72026	0.965032	27.0209	0	14.4755	44.3915	4.82516
	rep02	59.589	20.5853	25.4608	10.8344	241.606	5.41718	37.9203	2.16687	34.67	13.0012	69.3399	7.04234	60.6724	47.6712	3.25031	37.3786	21.6687	13.543	64.4645	4.33375	8.12577	36.2951	2.16687	14.6264	8.66749	7.04234	11.3761	16.2515	11.3761	13.0012	14.0847	20.5853	33.0448	23.2939	23.2939	19.5019	6.50062	6.50062	5.41718	10.8344	1.08344	0.541718	0.541718	17.8767	0.541718	5.41718	26.0025	5.41718
	rep03	26.9354	24.5181	37.6405	0.690652	43.1657	12.4317	1.3813	0	11.0504	8.28782	5.52521	2.07196	45.583	48.691	2.76261	5.17989	23.8275	11.7411	40.0578	20.7196	19.3383	45.9283	8.97847	0.690652	8.97847	4.48924	15.1943	8.28782	58.0148	4.83456	3.45326	23.4822	39.0218	22.1009	4.48924	26.5901	0.345326	2.07196	31.77	11.3958	6.56119	1.72663	0.345326	40.4031	2.76261	17.6116	17.2663	20.7196
	rep04	39.3779	19.4116	33.5544	0.554618	13.8654	5.54618	12.4789	0	8.59658	8.04196	7.21003	2.77309	34.9409	47.6971	3.0504	14.1428	15.5293	9.70581	40.7644	22.1847	19.9662	26.3444	6.93272	0	6.65542	3.0504	7.76465	9.98312	51.3022	6.1008	8.87389	26.899	25.7897	19.1343	9.4285	21.9074	4.99156	1.94116	20.7982	11.9243	8.04196	1.94116	0	14.1428	2.49578	13.0335	16.0839	13.8654
	rep05	51.8879	26.9614	16.7873	9.15669	77.8319	10.6828	87.4972	11.1915	34.5919	6.61316	69.6926	8.64798	35.1006	41.2051	1.52611	36.118	39.679	18.8221	52.9053	7.12187	12.7176	23.4004	29.5049	42.7312	15.7699	3.56093	8.13928	25.4352	19.3308	13.2263	6.10446	13.2263	24.4178	17.8047	43.7486	20.8569	16.7873	5.08705	14.2437	8.13928	2.54352	3.56093	1.01741	16.7873	1.01741	13.735	14.7524	9.15669
	rep06	33.5186	24.6646	11.3837	18.9728	43.6374	12.6485	49.3293	16.4431	30.9889	8.85397	65.1399	1.26485	29.724	43.005	3.79456	18.9728	51.859	20.8701	99.9234	13.281	28.4592	45.5347	125.853	65.1399	1.89728	2.52971	10.1188	11.3837	29.0916	19.6052	3.79456	12.0161	21.5025	13.281	14.5458	15.1782	0.632426	5.69184	13.9134	6.32426	1.26485	7.58912	3.16213	25.9295	1.26485	6.95669	12.0161	12.0161
[truncated: 5 more columns]
