# Supplementary material for: Cellular evolution of the hypothalamic preoptic area of behaviorally divergent deer mice
Source: eLife. 2025 Apr 7;13:RP103109. doi: 10.7554/eLife.103109 (PMC11975375; doi:10.7554/eLife.103109)
Supplement: Supplementary file 3. [file elife-103109-supp3.xlsx]

## Sheet: Sheet1
Supplementary File 3 - Significantly differentially expressed genes across species
Gene	Cell cluster	Log2FoldChange (Ppol/Pman)	LogCPM	F	Pvalue	FDR
1110002L01Rik	0	5.37665	4.34109	156.158	7.91608e-36	1.80041e-33
1110006O24Rik	0	1.86459	4.91644	62.7638	2.33526e-15	1.82447e-13
1110008F13Rik	0	0.454882	6.66266	12.5489	0.000396472	0.00639017
1110008L16Rik	0	-0.867954	4.76465	11.4915	0.000699192	0.0103162
1110059G10Rik	0	-0.542539	7.1349	21.8061	3.01724e-06	8.01396e-05
1500015A07Rik	0	1.34245	5.19059	41.5619	1.14305e-10	5.75348e-09
1600020E01Rik	0	2.08092	4.21328	42.2992	7.83985e-11	4.01861e-09
1700001G17Rik	0	-2.22029	3.39532	12.0494	0.000518125	0.00802349
1700001L19Rik	0	-1.95561	4.16821	28.1731	1.10981e-07	3.86344e-06
1700010K23Rik	0	4.13013	3.15311	24.521	7.35284e-07	2.2047e-05
1700013F07Rik	0	1.42284	3.89174	15.2158	9.59118e-05	0.00182798
1700020G03Rik	0	-1.8481	3.50482	10.3295	0.00130932	0.0175017
1700028P14Rik	0	-3.49548	3.67081	32.1995	1.39202e-08	5.49217e-07
1700029J07Rik	0	0.819981	4.99465	14.1592	0.000167992	0.00301638
1700030K09Rik	0	-0.789027	5.16996	12.7762	0.000351093	0.00573402
1700040L02Rik	0	1.23084	3.87149	10.987	0.000917604	0.0129724
1700040L08Rik	0	2.67924	3.48125	23.7967	1.07097e-06	3.11689e-05
1700041G16Rik	0	1.4407	3.48028	8.29017	0.00398621	0.0442329
1700088E04Rik	0	-0.532632	5.96197	10.0908	0.00149024	0.0195373
1700123O20Rik	0	-0.52765	5.69717	8.5147	0.00352304	0.0400043
1810022K09Rik	0	0.627786	6.12763	17.184	3.39337e-05	0.000722539
1810026B05Rik	0	-0.384793	7.01713	10.3863	0.00126963	0.0170752
1810030O07Rik	0	0.760816	4.74208	10.0517	0.00152215	0.0198539
1810032O08Rik	0	0.590999	6.08106	14.7798	0.000120837	0.00225543
2010107E04Rik	0	0.459936	8.5515	36.187	1.79393e-09	8.01757e-08
2010300C02Rik	0	1.15478	4.34518	16.2302	5.61024e-05	0.00112955
2200002D01Rik	0	-1.59088	4.31198	23.0538	1.57578e-06	4.40643e-05
2310009A05Rik	0	0.540561	5.8219	10.5813	0.00114247	0.0155974
2310011J03Rik	0	-0.840303	4.56177	9.27079	0.00232849	0.028632
2310033P09Rik	0	-1.11866	7.43896	102.246	4.92951e-24	7.0398e-22
2310039H08Rik	0	0.967688	4.77739	16.3623	5.2323e-05	0.00106267
2410004B18Rik	0	-0.965733	6.7903	52.8076	3.68415e-13	2.42223e-11
2410006H16Rik	0	-1.09562	5.77137	34.5201	4.22132e-09	1.79269e-07
2410015M20Rik	0	0.93681	8.40153	139.686	3.15008e-32	6.28053e-30
2410089E03Rik	0	0.538723	7.07058	21.8575	2.93752e-06	7.81573e-05
2410131K14Rik	0	1.04124	4.81665	18.7479	1.49215e-05	0.00034344
2610020C07Rik	0	0.878428	4.42386	9.97407	0.0015877	0.0206038
2700046G09Rik	0	0.823508	4.94432	13.6791	0.000216875	0.00377276
2700069I18Rik	0	-3.30953	4.1867	56.2767	6.30615e-14	4.39057e-12
2700078F05Rik	0	0.721398	4.72049	8.6929	0.00319468	0.0368757
2810002D19Rik	0	-2.60843	3.85521	29.257	6.34169e-08	2.26941e-06
2810004N23Rik	0	0.512391	6.08985	10.975	0.000923557	0.0130306
2810006K23Rik	0	-1.74467	4.48129	29.7482	4.92189e-08	1.80336e-06
2810013P06Rik	0	1.09264	6.44292	60.3985	7.76208e-15	5.79871e-13
2810405F17Rik	0	2.09848	4.74893	68.6645	1.17012e-16	1.04137e-14
2810408A11Rik	0	-1.74818	3.46019	8.89215	0.00286414	0.0338623
2810454H06Rik	0	-0.608798	5.79906	11.6756	0.0006333	0.0094853
2900022M07Rik	0	-3.4632	4.17788	59.2447	1.39494e-14	1.01493e-12
2900064K03Rik	0	1.09426	4.52853	16.8802	3.98208e-05	0.000832872
2900097C17Rik	0	-4.26606	3.41113	25.7822	3.82338e-07	1.20775e-05
3110082J24Rik	0	2.92774	2.91016	9.6861	0.00185678	0.0236363
3830408C21Rik	0	0.860997	4.36048	9.16763	0.00246346	0.0298847
4632427E13Rik	0	0.480297	8.76404	42.8752	5.84031e-11	3.02907e-09
4732440D04Rik	0	-0.898824	7.87022	85.9755	1.82885e-20	2.15973e-18
4833413G10Rik	0	2.33763	3.02738	8.42923	0.00369254	0.0414233
4921507G05Rik	0	2.92517	3.59194	32.1976	1.39343e-08	5.49217e-07
4930402H24Rik	0	-0.428527	6.69007	10.266	0.00135514	0.0180435
4930405A21Rik	0	4.03715	3.70753	60.5087	7.3396e-15	5.50991e-13
4930430A15Rik	0	-3.9741	3.10661	15.8005	7.03953e-05	0.00138998
4930430F08Rik	0	-1.08967	6.77136	64.8845	7.95931e-16	6.46515e-14
4930452B06Rik	0	1.36435	3.83689	12.7935	0.000347867	0.00568739
4930481B07Rik	0	2.0498	3.7044	22.7103	1.88407e-06	5.17891e-05
4930512B01Rik	0	-1.79764	5.12854	51.6297	6.71136e-13	4.28411e-11
4930516B21Rik	0	-2.34289	3.26682	9.29233	0.00230127	0.028354
4930524J08Rik	0	0.841091	4.60008	10.927	0.000947814	0.0133249
4930539J05Rik	0	1.39201	4.01405	16.5552	4.72621e-05	0.000974571
4930540M05Rik	0	5.13036	3.54367	59.7641	1.0714e-14	7.90773e-13
4930563E22Rik	0	-0.480395	6.70887	13.163	0.000285555	0.00479895
4930566N20Rik	0	-1.17746	3.8789	8.29235	0.00398141	0.0441957
4930579G18Rik	0	-3.37244	4.10668	53.9442	2.06582e-13	1.37889e-11
4930594M22Rik	0	2.37745	3.31038	15.1796	9.77643e-05	0.00185867
4932438A13Rik	0	-0.456586	8.55578	33.8446	5.97317e-09	2.4717e-07
4932443I19Rik	0	-0.76639	4.76248	9.05679	0.00261735	0.0313428
4933406P04Rik	0	1.43968	4.36425	25.4737	4.48625e-07	1.39986e-05
4933412L11Rik	0	-0.6237	6.16011	14.2009	0.000164307	0.00296235
4933423P22Rik	0	1.29098	4.47234	21.6036	3.35314e-06	8.87541e-05
4933430I17Rik	0	-1.33288	3.98771	11.7924	0.000594793	0.00899631
4933433G15Rik	0	2.20225	4.13976	42.5775	6.80016e-11	3.51502e-09
5031425E22Rik	0	0.862551	7.41919	69.1586	9.1082e-17	8.1296e-15
5031439G07Rik	0	-0.925807	7.62479	79.6981	4.37661e-19	4.71507e-17
5033430I15Rik	0	1.38324	4.81046	33.2161	8.25146e-09	3.36012e-07
5330434G04Rik	0	-0.485837	9.96659	70.8345	3.89506e-17	3.55935e-15
5430400D12Rik	0	2.90169	2.98057	10.3111	0.00132243	0.0176616
5530601H04Rik	0	0.604025	6.02052	14.8122	0.000118782	0.00222248
5730455P16Rik	0	-3.60733	6.52685	333.314	1.9306e-74	1.11844e-71
5730507A11Rik	0	-1.87726	4.438	33.8838	5.85386e-09	2.42888e-07
6330408A02Rik	0	0.822913	4.63273	10.7835	0.00102416	0.0142288
6330410L21Rik	0	3.73719	2.93443	15.7175	7.35511e-05	0.00144281
6430710M23Rik	0	1.02192	3.97155	8.03383	0.00459135	0.0496733
6720482G16Rik	0	-1.35456	4.79224	25.6534	4.08727e-07	1.2845e-05
8030453O22Rik	0	-2.83229	3.02428	8.76123	0.00307715	0.035829
9130008F23Rik	0	1.80869	3.51086	13.2314	0.00027532	0.00463964
9130019O22Rik	0	1.15584	3.85942	9.51251	0.00204087	0.025671
9230110C19Rik	0	0.692222	4.75037	8.37056	0.00381365	0.0426417
9330160F10Rik	0	1.133	4.3049	14.9794	0.000108705	0.00205396
9330162G02Rik	0	-0.447947	9.45751	48.5871	3.16328e-12	1.91569e-10
9330175M20Rik	0	3.20537	3.13159	17.2203	3.32922e-05	0.000710851
9430015G10Rik	0	1.07721	4.89987	22.1822	2.48025e-06	6.65679e-05
9430038I01Rik	0	1.26761	4.43995	21.4214	3.68736e-06	9.70151e-05
9930004E17Rik	0	-1.66471	5.61912	65.1024	7.12652e-16	5.86629e-14
A230050P20Rik	0	-0.455407	8.03021	25.8753	3.64339e-07	1.15684e-05
A230072E10Rik	0	-2.54408	4.19606	42.9175	5.71548e-11	2.97942e-09
A230083G16Rik	0	-1.13108	4.94373	21.876	2.90923e-06	7.74719e-05
A230107N01Rik	0	1.87061	5.27593	82.0771	1.31339e-19	1.44539e-17
A26c2	0	-4.13318	3.26612	21.0941	4.37389e-06	0.000113521
A330023F24Rik	0	-0.501891	7.96199	30.2057	3.88766e-08	1.43815e-06
A330041J22Rik	0	-1.65165	3.6276	10.3674	0.00128265	0.0172127
A330074K22Rik	0	-0.691731	5.40737	11.7442	0.000610383	0.0092004
A430005L14Rik	0	-0.519493	5.69335	8.313	0.0039364	0.0438065
A430046D13Rik	0	-2.4724	3.64593	20.8016	5.09528e-06	0.00013048
A630052C17Rik	0	2.33247	4.11439	46.1549	1.09389e-11	6.11784e-10
A830005F24Rik	0	2.94221	2.81065	8.41777	0.00371588	0.0416395
A830082K12Rik	0	-0.524856	5.66991	8.24692	0.00408229	0.045071
A930005H10Rik	0	-1.28927	5.86335	48.7381	2.92895e-12	1.7808e-10
A930006L05Rik	0	3.64427	3.6911	50.2977	1.32281e-12	8.20517e-11
A930024E05Rik	0	-1.30685	5.01687	28.8615	7.77798e-08	2.7545e-06
AA465934	0	0.537592	6.11609	12.481	0.00041114	0.00659355
AC105169.2	0	-5.34655	3.8644	61.3443	4.80133e-15	3.64901e-13
AC107763.1	0	-1.51163	5.44851	49.6511	1.83904e-12	1.13385e-10
AC112274.1	0	-0.986215	4.63156	12.8625	0.000335269	0.00551371
AC115037.1	0	1.09564	4.04938	10.9369	0.000942763	0.0132783
AC115744.1	0	-1.42817	4.5662	23.6815	1.13702e-06	3.29351e-05
AC115910.1	0	-0.776201	4.99793	10.977	0.000922574	0.0130238
AC117639.1	0	-0.868006	4.34912	8.0717	0.00449638	0.0487705
AC117797.2	0	0.732231	6.47732	28.2276	1.07905e-07	3.76489e-06
AC120394.1	0	-1.30264	6.22586	62.3594	2.86754e-15	2.22898e-13
AC120394.3	0	2.61778	3.87394	41.8261	9.98549e-11	5.05931e-09
AC121804.3	0	0.60916	6.45947	18.7968	1.45441e-05	0.000336267
AC121961.1	0	2.45096	4.25423	58.3139	2.23857e-14	1.60968e-12
AC123705.2	0	0.988625	4.27783	11.2266	0.000806389	0.0116241
AC123738.2	0	-1.98187	3.28532	8.09522	0.0044384	0.0482634
AC123832.1	0	-1.8043	4.73044	39.1569	3.914e-10	1.87774e-08
AC124433.1	0	6.24693	4.6141	211.637	6.17686e-48	2.17994e-45
AC124586.1	0	-0.692023	5.41393	11.4624	0.000710223	0.0104538
AC125206.2	0	6.44359	5.07519	308.248	5.52182e-69	2.77937e-66
AC125361.1	0	3.1378	2.88401	10.0503	0.00152335	0.0198611
AC126549.2	0	3.9632	4.40079	129.117	6.44945e-30	1.1513e-27
AC130661.1	0	-0.895054	5.56394	20.9693	4.66819e-06	0.000120447
AC130831.1	0	-1.81002	4.13999	23.9997	9.63835e-07	2.83463e-05
AC132344.1	0	2.04387	4.67226	63.4823	1.62161e-15	1.28989e-13
AC133650.1	0	-2.29747	3.31958	10.3373	0.00130375	0.0174425
AC139750.1	0	4.05535	3.09275	21.9102	2.85786e-06	7.61699e-05
AC140477.3	0	0.733622	4.85875	10.1177	0.00146858	0.0192945
AC147241.1	0	1.06728	5.8364	39.809	2.80283e-10	1.36384e-08
AC147615.2	0	0.484199	6.55353	12.876	0.000332857	0.00547991
AC148324.1	0	1.216	4.16652	15.3534	8.91726e-05	0.00171444
AC149222.1	0	-2.37348	4.56551	51.0587	8.97705e-13	5.61368e-11
AC152944.1	0	0.779275	4.56299	8.79763	0.00301637	0.0352683
AC153144.3	0	3.45219	4.55092	124.322	7.21817e-29	1.25213e-26
AC153379.2	0	5.06111	3.50644	53.382	2.75018e-13	1.81595e-11
AC153497.1	0	-2.00175	4.04577	24.2558	8.43787e-07	2.51286e-05
AC153524.4	0	-2.43058	3.65591	20.1597	7.12536e-06	0.000177147
AC153566.1	0	-1.53685	4.1093	17.097	3.55245e-05	0.0007512
AC153801.2	0	0.836335	4.33936	8.45452	0.00364154	0.0409864
AC153971.2	0	-2.72173	4.2058	47.6166	5.18907e-12	3.02325e-10
AC154511.1	0	-3.53907	3.1892	13.6316	0.00022244	0.00385429
AC154550.1	0	-0.893145	4.61962	10.7675	0.00103303	0.0143179
AC154552.7	0	4.03116	4.44838	135.785	2.24423e-31	4.27992e-29
AC154681.1	0	-3.63023	3.04612	12.549	0.00039645	0.00639017
AC154682.1	0	2.70289	4.67023	100.183	1.39704e-23	1.93219e-21
AC155830.1	0	0.647813	5.43429	11.392	0.000737685	0.0107857
AC158605.1	0	1.95513	3.49667	14.695	0.000126397	0.00234921
AC159193.5	0	2.01456	3.77157	22.7622	1.83386e-06	5.05901e-05
AC159244.3	0	1.70207	3.5255	11.9619	0.000543047	0.0083452
AC159296.1	0	0.990812	3.97833	8.23354	0.00411251	0.0452907
AC159308.4	0	3.65342	3.02206	15.2829	9.25626e-05	0.00177185
AC159379.2	0	1.59688	3.39405	8.12712	0.00436099	0.0476173
AC159813.1	0	-2.94806	3.23084	12.5399	0.000398389	0.00641433
AC160637.1	0	1.19788	3.7301	8.27324	0.00402355	0.0445025
AC162467.1	0	2.71951	3.15094	13.2972	0.000265834	0.00449707
AC162467.4	0	-2.23569	3.32094	10.4924	0.00119871	0.016266
AC162940.1	0	1.45989	3.50956	8.53797	0.00347829	0.0396427
AC163038.1	0	3.57308	3.1516	19.6716	9.198e-06	0.000223607
AC163102.1	0	2.23365	4.09494	43.152	5.06987e-11	2.6564e-09
AC166098.1	0	1.04859	4.62654	17.2468	3.28299e-05	0.000702446
AC166996.1	0	-2.19097	3.22588	8.16286	0.00427588	0.0468045
AC171003.1	0	3.03405	2.81087	8.86246	0.00291109	0.0343118
AI480526	0	0.417481	8.47365	28.7158	8.38543e-08	2.96279e-06
AK157302	0	2.91018	4.34957	84.679	3.5227e-20	4.02085e-18
AW551984	0	0.31774	7.5909	10.2388	0.00137526	0.0182402
Aaas	0	-0.546143	5.592	8.60935	0.00334458	0.0384183
Aak1	0	-0.512642	7.13073	19.2239	1.16272e-05	0.00027535
Abca5	0	-0.372382	8.05567	17.3883	3.04744e-05	0.000658935
Abca6	0	-2.32276	3.81592	23.5661	1.20731e-06	3.48068e-05
Abca9	0	-1.82386	3.75231	14.4067	0.000147293	0.00268875
Abcb9	0	-0.863322	6.03702	26.6096	2.49096e-07	8.13642e-06
Abcc10	0	0.87	4.6358	12.1051	0.000502884	0.00783784
Abcc6	0	0.969083	4.21091	10.1727	0.00142546	0.0187681
Abcd4	0	1.28304	6.47586	86.0555	1.75632e-20	2.08911e-18
Abce1	0	0.453474	6.85825	13.8533	0.000197674	0.00348021
Abcf3	0	-0.680469	6.52758	23.2281	1.43921e-06	4.07276e-05
Abhd11	0	-0.501579	6.19697	10.4999	0.00119386	0.0162124
Abhd17c	0	-0.559982	6.06972	11.9375	0.000550188	0.00843383
Abhd18	0	0.687729	6.35096	23.4742	1.26641e-06	3.634e-05
Ablim1	0	-1.13546	6.86013	72.9608	1.32618e-17	1.26851e-15
Abra	0	-1.10736	4.60107	15.5727	7.94042e-05	0.00154501
Abraxas2	0	0.500099	5.92256	9.47273	0.00208561	0.0261373
Acad9	0	0.575916	5.85222	12.0498	0.000518036	0.00802349
Acadm	0	0.593061	5.21453	8.51553	0.00352144	0.0400009
Acads	0	-0.725165	5.16173	10.9323	0.000945092	0.013305
Acap2	0	0.530015	6.35461	13.7783	0.000205724	0.00359663
Acat2	0	2.85832	3.63474	36.7556	1.34004e-09	6.06851e-08
Acbd3	0	-0.489628	6.56703	12.4281	0.000422966	0.00674987
Acer2	0	-5.54287	4.07961	75.6165	3.45508e-18	3.46682e-16
Aco1	0	0.94056	4.80595	15.9481	6.51127e-05	0.00129238
Acot1	0	-2.21961	3.91527	24.6815	6.76532e-07	2.0425e-05
Acot5	0	-2.17169	3.30789	9.51947	0.00203315	0.0255948
Acp1	0	-0.438548	6.7073	11.0649	0.000879861	0.0125013
Acp2	0	1.08431	7.27116	100.747	1.05094e-23	1.46009e-21
Acsl1	0	0.708731	5.37006	13.4509	0.000244912	0.00418229
Acsm3	0	3.40508	3.08987	16.4753	4.92951e-05	0.00100932
Acss2	0	0.871233	5.93011	28.5308	9.22589e-08	3.24481e-06
Actl6a	0	-1.2996	5.43581	38.211	6.3542e-10	2.96054e-08
Actn1	0	-0.37	6.87209	8.78313	0.00304043	0.0354687
Actr2	0	-0.80954	6.5252	32.6337	1.11332e-08	4.47428e-07
Actr5	0	-1.20012	4.42027	15.6484	7.62867e-05	0.00149002
Acvr1	0	-1.45849	4.85533	31.4669	2.02983e-08	7.78075e-07
Acy3	0	1.00233	4.64964	16.3419	5.28898e-05	0.0010719
Acyp2	0	0.909132	5.48254	24.0176	9.54906e-07	2.81376e-05
Adam11	0	-0.473741	6.2355	9.65529	0.00188818	0.0239664
Adamts10	0	-1.07461	5.59119	30.4357	3.453e-08	1.29136e-06
Adamts14	0	1.65228	3.57768	13.0898	0.000296941	0.00496043
Adamtsl4	0	-1.87339	3.67241	13.5885	0.0002276	0.00391717
Adarb2	0	-0.377211	7.33897	11.9426	0.000548701	0.00841524
Adat1	0	1.06854	4.25982	13.0011	0.000311334	0.00516993
Adck5	0	-0.791461	6.75071	35.6391	2.37636e-09	1.04383e-07
Adgra1	0	0.586126	5.88687	12.8115	0.000344534	0.00564492
Adgrb2	0	0.451314	6.80812	13.3328	0.000260837	0.00442227
Adgrb3	0	0.852986	9.03011	150.822	1.16004e-34	2.49075e-32
Adgrf3	0	-6.54858	6.95911	667.533	4.31231e-147	5.75675e-144
Adra1a	0	-0.975474	4.66158	13.0465	0.000303879	0.00505982
Adsl	0	-0.598281	6.44335	17.2295	3.31302e-05	0.000707884
Aebp2	0	-1.80749	6.73454	151.319	9.03252e-35	1.96691e-32
Afap1l2	0	3.0378	2.83468	9.03155	0.00265373	0.0317431
Aff4	0	0.841208	7.51921	68.4564	1.30033e-16	1.15058e-14
Aga	0	1.0048	6.73626	63.4265	1.66812e-15	1.32346e-13
Agap2	0	0.40468	6.53839	9.02603	0.00266175	0.0317877
Agbl3	0	0.537267	7.1566	23.2967	1.38877e-06	3.95555e-05
Aggf1	0	0.529005	5.96266	10.8938	0.000964948	0.0135225
Agk	0	0.493518	6.0951	10.2543	0.00136378	0.0181207
Agmat	0	4.13473	3.09214	22.8545	1.74793e-06	4.84372e-05
Ago3	0	-0.47818	6.61524	12.365	0.000437507	0.00695302
Ago4	0	1.18233	4.69669	22.4774	2.12689e-06	5.77911e-05
Agtpbp1	0	-0.39779	7.05631	11.2652	0.000789802	0.0114172
Ahcyl1	0	-0.482051	7.41356	20.4725	6.05086e-06	0.000152533
Ahr	0	-1.48146	4.09204	16.4698	4.94395e-05	0.00101119
Ahsa2	0	0.816443	6.61869	39.0581	4.11708e-10	1.96595e-08
Ak3	0	-0.82874	4.83253	10.9213	0.000950741	0.0133478
Ak9	0	1.53208	3.39807	8.11145	0.00439885	0.0479284
Akain1	0	2.67964	3.72054	36.1334	1.84394e-09	8.2291e-08
Akap12	0	-0.807677	4.51805	8.08031	0.00447506	0.0486035
Akap3	0	-2.06567	3.45589	11.3978	0.000735376	0.0107673
Akap9	0	0.327206	8.78861	20.2115	6.93515e-06	0.000172838
Aknad1	0	4.80782	3.39604	43.2985	4.7042e-11	2.48585e-09
Akr1b8	0	-3.33531	3.02245	10.3035	0.00132784	0.0177184
Akr1e1	0	1.6087	4.74004	42.0268	9.01161e-11	4.5886e-09
Alcam	0	0.712788	7.98224	64.9204	7.81597e-16	6.36555e-14
Aldh1a7	0	2.53619	3.54684	26.4412	2.71781e-07	8.79937e-06
Aldh3a1	0	-2.04945	4.39203	37.0918	1.12782e-09	5.16846e-08
Alg11	0	0.618201	5.28243	9.58716	0.00195954	0.0247697
Alg12	0	2.36068	5.93724	188.314	7.55654e-43	2.1483e-40
Alg3	0	0.597019	5.64501	11.4666	0.000708654	0.0104357
Alg5	0	-2.95741	5.6454	146.831	8.638e-34	1.79203e-31
Alkbh6	0	0.785928	5.48012	17.7308	2.54516e-05	0.000557393
Alox12e	0	-3.3681	3.02463	10.7811	0.00102551	0.0142304
Aloxe3	0	1.29959	4.78202	29.4146	5.84617e-08	2.11177e-06
Amd1	0	-0.240071	8.6042	9.84947	0.00169891	0.0218805
Amdhd2	0	-1.28728	5.82373	48.47	3.35804e-12	2.02564e-10
Amer2	0	0.370919	6.68996	8.28578	0.00399585	0.0442599
Amh	0	-1.28388	3.7822	8.51056	0.00353108	0.0400659
Ammecr1l	0	-0.634886	5.84955	13.2517	0.000272361	0.00459734
Amn1	0	-0.264715	8.05806	8.90717	0.00284067	0.0336366
Amotl1	0	-1.62134	4.34735	24.0642	9.3208e-07	2.75179e-05
Ampd3	0	-1.00868	5.04701	18.6036	1.60944e-05	0.000368227
Amy2a5	0	-3.06971	5.22005	118.129	1.63684e-27	2.79208e-25
Amz1	0	-0.910829	4.54889	10.4855	0.00120323	0.0163036
Anapc1	0	-0.897257	7.44946	67.3408	2.2895e-16	1.98578e-14
Anapc5	0	0.250455	8.16714	8.80195	0.00300923	0.0352131
Angptl2	0	3.06795	3.94607	56.1518	6.71969e-14	4.65737e-12
Angptl3	0	-1.56391	3.83196	12.8428	0.000338817	0.00556908
Ank2	0	0.332093	10.1102	35.8776	2.10252e-09	9.30822e-08
Ankle2	0	-0.544165	6.24159	12.5669	0.000392681	0.00633572
Ankmy1	0	4.28358	5.60978	328.843	1.81479e-73	1.03188e-70
Ankrd12	0	1.91567	7.29987	295.467	3.34849e-66	1.55776e-63
Ankrd13d	0	0.453348	6.82473	13.6269	0.000222994	0.00385953
Ankrd24	0	-0.914448	5.37479	19.6578	9.26447e-06	0.000224689
Ankrd27	0	1.03996	4.15978	11.1811	0.000826427	0.0118684
Ankrd31	0	-1.34099	4.16721	14.9988	0.000107596	0.00203425
Ankrd40	0	-1.30085	4.88049	26.2696	2.97038e-07	9.57005e-06
Ankrd42	0	-1.97795	6.00171	109.857	1.06005e-25	1.62739e-23
Ankrd44	0	0.796988	5.45909	17.9423	2.27746e-05	0.000504161
Anks3	0	0.716017	7.42531	48.0072	4.25179e-12	2.5057e-10
Anks6	0	1.80643	3.63987	16.6637	4.46339e-05	0.000924099
Ano3	0	2.56906	4.70031	93.2149	4.71259e-22	6.07964e-20
Ano6	0	-0.670325	6.6143	24.0093	9.58995e-07	2.8231e-05
Anxa6	0	-0.773824	4.74964	9.16028	0.00247337	0.0299694
Ap3m1	0	-1.01873	5.78827	31.1967	2.3329e-08	8.84311e-07
Ap4s1	0	0.789749	4.97506	12.8879	0.000330753	0.00545113
Apba3	0	-6.48252	4.74587	147.519	6.11303e-34	1.27683e-31
Aph1b	0	0.551669	6.61682	17.7998	2.45452e-05	0.000539467
Apoe	0	0.466577	10.6853	85.1898	2.72086e-20	3.1525e-18
Apom	0	-2.6804	3.08776	8.47158	0.00360755	0.040762
Apoo	0	-0.428715	6.467	9.22664	0.00238531	0.0291202
Apopt1	0	0.454987	6.50221	11.2164	0.000810852	0.011683
Appl1	0	0.369633	7.50591	13.3799	0.000254359	0.00432438
Appl2	0	-0.627705	5.34333	9.34998	0.00223	0.0276117
Arap2	0	1.48836	4.4943	29.7313	4.9651e-08	1.81486e-06
Arfgef3	0	-0.604388	6.45511	17.6188	2.69959e-05	0.000588277
Arglu1	0	0.736223	9.84243	161.34	5.84331e-37	1.4353e-34
Arhgap26	0	-0.416409	6.66583	9.4961	0.00205921	0.0258593
Arhgdia	0	-0.335127	7.51308	10.6233	0.00111678	0.0153011
Arhgef25	0	-0.574568	6.82135	20.1074	7.32293e-06	0.000181325
Arhgef40	0	-0.564492	7.33944	26.5458	2.57462e-07	8.39184e-06
Arhgef7	0	-0.519283	6.44969	13.1072	0.00029419	0.00492788
Arid4a	0	0.292796	8.01449	11.1215	0.000853401	0.0122018
Arl13b	0	0.631492	5.23993	9.64741	0.0018963	0.0240495
Arl5b	0	0.615025	5.70353	12.2506	0.000465154	0.00733543
Arl6	0	-0.577997	5.3489	8.04571	0.00456135	0.049401
Arl6ip4	0	0.522382	6.60146	15.948	6.51159e-05	0.00129238
Armc9	0	0.382962	6.73221	9.07278	0.00259455	0.0311366
Armt1	0	0.716891	4.75614	9.0111	0.00268358	0.0319863
Arnt	0	-0.751442	6.83952	33.7191	6.37099e-09	2.6257e-07
Arpin	0	-1.12788	4.25227	12.1635	0.000487372	0.00762705
Arrb2	0	-0.504681	6.28805	11.2108	0.000813272	0.0117123
Arsa	0	0.751742	5.42037	15.7559	7.20737e-05	0.00141947
Arvcf	0	3.51117	4.16743	90.8924	1.52352e-21	1.91714e-19
As3mt	0	-0.76755	5.46954	14.799	0.000119615	0.00223398
Asb7	0	-0.956186	5.1843	18.6572	1.56482e-05	0.000358822
Ascc1	0	0.659971	6.39898	22.3073	2.32383e-06	6.28089e-05
Asf1a	0	-0.467835	6.04978	8.24399	0.00408889	0.0451115
Asic3	0	2.15912	4.61966	67.7324	1.87708e-16	1.64668e-14
Asph	0	0.32587	7.09152	8.19052	0.00421116	0.0462114
Aste1	0	0.419417	6.32795	8.54272	0.00346922	0.039554
Atcay	0	0.571041	6.73691	20.4881	6.00172e-06	0.000151419
Ate1	0	-0.34971	8.14245	16.2984	5.41189e-05	0.00109609
Atf2	0	0.647021	7.91912	51.503	7.15894e-13	4.55089e-11
Atf6b	0	0.979768	6.48734	51.8223	6.08431e-13	3.91145e-11
Atg10	0	-1.6172	5.60398	63.3341	1.74822e-15	1.38344e-13
Atic	0	-0.459914	6.4134	10.1083	0.00147609	0.0193766
Atl2	0	-1.3553	6.6577	88.6549	4.71985e-21	5.77363e-19
Atl3	0	1.10661	5.22052	29.2817	6.26123e-08	2.24585e-06
Atp11a	0	1.10644	5.65418	38.8023	4.69354e-10	2.22737e-08
Atp1a3	0	-0.229128	8.57419	8.83333	0.00295793	0.0347837
Atp2b2	0	-0.37043	8.03337	17.2159	3.33687e-05	0.000711989
Atp6v1e1	0	1.20983	8.1217	201.363	1.07492e-45	3.51108e-43
Atpaf1	0	-1.08686	5.28099	24.6378	6.92056e-07	2.08527e-05
Atr	0	0.677235	6.73582	28.4652	9.54376e-08	3.34511e-06
Atxn3	0	-1.69023	5.96756	83.3926	6.75172e-20	7.53836e-18
Atxn7l3b	0	0.268232	9.25378	16.9092	3.92164e-05	0.000824162
Auts2	0	-0.412567	9.25116	38.4631	5.58434e-10	2.62575e-08
Avl9	0	0.528353	7.17306	22.4094	2.20359e-06	5.97168e-05
Avp	0	-0.206326	9.8896	12.4584	0.000416155	0.00665619
Axdnd1	0	1.26429	3.80916	10.5278	0.00117597	0.0160048
B3galnt1	0	0.648852	5.61926	13.2719	0.000269443	0.00455059
B3galt5	0	-1.0892	4.30247	11.7309	0.00061477	0.00925289
B3gnt2	0	3.18129	3.25239	22.0761	2.62117e-06	7.0044e-05
B430218F22Rik	0	2.08346	3.36096	13.0913	0.0002967	0.0049591
B4galt4	0	-0.736066	5.23532	11.7602	0.000605167	0.00913074
B4galt7	0	-0.501906	5.87027	8.60525	0.00335211	0.0384904
B930094E09Rik	0	-1.45905	3.76602	10.3438	0.0012992	0.0174043
BC005537	0	-0.699826	8.01597	58.2197	2.34842e-14	1.68472e-12
BC005561	0	0.426948	7.4953	17.6844	2.60809e-05	0.000569956
BC024978	0	2.53975	3.07107	10.6215	0.00111786	0.0153021
BC028528	0	1.04893	3.92336	8.71843	0.00315024	0.036445
BC029722	0	4.74991	6.17725	531.881	1.27178e-117	1.22028e-114
BC037034	0	0.930914	4.827	16.1118	5.97187e-05	0.00119687
BC052040	0	-1.22887	5.20502	29.385	5.93631e-08	2.14182e-06
Babam1	0	1.35395	7.46798	171.615	3.33438e-39	8.39169e-37
Bach2	0	-1.46174	3.61374	8.41969	0.00371195	0.0416107
Bad	0	-0.617307	7.05928	26.8139	2.24106e-07	7.39093e-06
Bag4	0	-1.01844	5.98665	34.2938	4.7418e-09	2.00332e-07
Baiap3	0	-0.263887	8.44062	10.9227	0.000950016	0.0133437
Banp	0	-0.654911	5.32135	10.0688	0.00150812	0.0197212
Bbs10	0	0.956705	5.76297	31.1215	2.42501e-08	9.1471e-07
Bcat1	0	-0.579196	6.46782	16.1829	5.75201e-05	0.00115734
Bcdin3d	0	1.20872	3.86106	10.4294	0.00124036	0.0167549
Bcl11a	0	-0.413487	6.73542	10.0679	0.00150886	0.0197224
Bcl2l15	0	-2.58701	4.12362	38.2404	6.2592e-10	2.92515e-08
Bclaf1	0	0.742076	7.79097	63.2296	1.84352e-15	1.45137e-13
Begain	0	-0.507301	5.9728	9.38861	0.00218349	0.0271425
Bend6	0	-0.437826	7.15542	14.554	0.000136214	0.00251039
Bex1	0	-2.06295	8.85869	638.128	1.05009e-140	1.28968e-137
Bex2	0	0.517776	9.50887	70.6601	4.25506e-17	3.87678e-15
Bex4	0	0.53897	7.64557	31.1928	2.3375e-08	8.84964e-07
Bhlha9	0	-1.08721	4.21245	10.8069	0.0010113	0.0140693
Bhlhb9	0	-1.04189	7.6059	98.8926	2.67931e-23	3.64007e-21
Bicd1	0	-0.2611	8.61274	11.3725	0.000745457	0.0108889
Bicdl2	0	1.86934	3.31021	10.0155	0.00155237	0.0202052
Birc6	0	0.212567	8.72196	8.19147	0.00420895	0.0462036
Bloc1s3	0	0.878649	4.24528	8.72801	0.00313373	0.0363057
Bmpr2	0	-1.0724	6.06371	40.061	2.46368e-10	1.20839e-08
Bnip3l	0	0.409127	6.83258	11.0865	0.000869635	0.0123709
Borcs8	0	-0.682348	7.19539	35.3551	2.74935e-09	1.194e-07
Brap	0	-1.0345	6.89224	61.8039	3.80183e-15	2.94034e-13
Brat1	0	-0.985813	5.27582	20.645	5.52934e-06	0.000140192
Brd7	0	0.754512	6.77232	36.2909	1.70076e-09	7.62559e-08
Brf1	0	0.914825	4.96338	16.7147	4.34489e-05	0.000901388
Bri3bp	0	-1.64717	5.76493	71.058	3.47786e-17	3.21639e-15
Brinp2	0	-0.637788	7.12359	29.3071	6.1798e-08	2.21923e-06
Brinp3	0	0.30214	7.8463	10.727	0.00105593	0.0145844
Brox	0	1.08501	6.25075	54.6075	1.47405e-13	1.00131e-11
Brwd1	0	0.586755	7.21372	28.3055	1.03648e-07	3.62462e-06
Bscl2	0	0.303755	7.48674	8.97198	0.00274165	0.0325772
Btbd1	0	-0.523005	6.95188	18.1961	1.99325e-05	0.000445744
Btbd3	0	-0.490168	6.58381	12.7266	0.000360533	0.00586636
Btbd9	0	-0.511586	6.95427	17.3542	3.10268e-05	0.000670407
Btg3	0	0.680803	5.7457	15.9215	6.60348e-05	0.00130978
Btrc	0	-0.633274	5.6056	11.2002	0.000817934	0.011774
Bzw1	0	0.396155	6.83287	10.4148	0.00125016	0.0168651
C030034L19Rik	0	-3.25035	3.24975	15.7174	7.35564e-05	0.00144281
C130036L24Rik	0	4.07424	3.59862	56.0742	6.99018e-14	4.83393e-12
C130073E24Rik	0	-0.389641	9.73006	41.2218	1.36021e-10	6.80192e-09
C1qbp	0	-1.25628	8.21352	196.969	9.77058e-45	3.06118e-42
C1qtnf12	0	1.30192	4.41009	22.2774	2.36027e-06	6.36817e-05
C230038L03Rik	0	0.839611	6.61559	40.0053	2.53494e-10	1.23938e-08
C3	0	-4.58603	3.47125	31.4049	2.0956e-08	8.01286e-07
C330007P06Rik	0	-1.13865	6.32126	52.6217	4.04986e-13	2.65132e-11
C330018D20Rik	0	1.6121	5.5015	73.4663	1.02657e-17	9.94314e-16
C330027C09Rik	0	1.52589	3.57951	11.0294	0.00089686	0.0127075
C4b	0	-6.12245	4.30342	111.182	5.43217e-26	8.64193e-24
C630004M23Rik	0	0.609002	5.46879	10.5019	0.00119262	0.0162028
CAAA01194877.1	0	1.49505	3.46016	8.22718	0.00412694	0.0454008
CT009504.3	0	1.46224	3.92356	16.4762	4.92714e-05	0.00100932
CT025619.1	0	-2.8349	3.7668	28.0171	1.20298e-07	4.17358e-06
CT025660.2	0	-3.20155	3.53655	23.5027	1.24773e-06	3.58712e-05
Cabp1	0	-1.13869	4.77231	19.0223	1.29224e-05	0.000302647
Cabp5	0	-3.72109	3.16926	15.2336	9.50086e-05	0.00181295
Cacna1a	0	-1.09013	7.39358	94.3776	2.61935e-22	3.42232e-20
Cacna1b	0	0.54535	6.43105	15.2935	9.20445e-05	0.00176413
Cacna1e	0	0.52018	7.28221	23.1656	1.48677e-06	4.17657e-05
Cacna1i	0	0.844284	5.18241	16.5949	4.62816e-05	0.000956279
Cacna2d3	0	0.544554	6.05163	12.0586	0.000515584	0.00800733
Cacng8	0	2.67138	5.16381	137.428	9.81641e-32	1.90761e-29
Cadm4	0	-0.369533	7.48442	12.5435	0.000397617	0.00640526
Calb2	0	-0.377212	7.7421	15.4072	8.66711e-05	0.00167425
Calcr	0	-0.407891	6.69997	9.61706	0.00192789	0.0243998
Cald1	0	-1.30901	6.23577	63.6233	1.50954e-15	1.20701e-13
Camk2n2	0	-0.232172	8.69254	9.67031	0.00187281	0.0238153
Camkk1	0	-0.588557	5.58539	9.69312	0.0018497	0.0235558
Camkv	0	-0.692323	8.24521	65.0599	7.28166e-16	5.97797e-14
Camsap1	0	-0.667982	6.12207	17.2547	3.26937e-05	0.000700677
Camta1	0	0.350334	9.50267	31.4487	2.04891e-08	7.8441e-07
Cand2	0	2.77463	3.17217	14.5898	0.00013365	0.00246757
Capn7	0	-0.665946	5.85802	14.6813	0.000127316	0.00236342
Car11	0	0.390462	7.76776	17.4602	2.93433e-05	0.000635686
Card19	0	1.25497	5.47141	44.8973	2.07869e-11	1.1438e-09
Card9	0	-2.01693	4.15805	29.0576	7.02897e-08	2.49789e-06
Carf	0	0.880158	6.02694	31.0987	2.4536e-08	9.24361e-07
Carmil1	0	-0.536485	5.57595	8.07229	0.00449492	0.0487705
Casp2	0	1.34789	4.87133	33.8287	6.02224e-09	2.48678e-07
Catip	0	-2.20199	4.31712	39.4199	3.42078e-10	1.64885e-08
Catsper2	0	1.55567	3.97888	19.1398	1.21512e-05	0.000286332
Catsperg2	0	-1.6529	3.66907	11.3315	0.000762081	0.0110895
Cbarp	0	-0.320269	9.61059	27.285	1.75638e-07	5.91964e-06
Cby1	0	-0.600285	6.18217	14.502	0.000140027	0.00257449
Cc2d1b	0	-0.530228	6.50269	14.1879	0.000165454	0.00297954
Ccdc103	0	1.14641	3.77122	8.34902	0.00385913	0.0431032
Ccdc113	0	0.657956	4.90375	8.52615	0.00350096	0.0398271
Ccdc117	0	1.86451	3.79949	21.3888	3.75047e-06	9.84226e-05
Ccdc126	0	-0.897275	6.45572	37.1374	1.10171e-09	5.0639e-08
Ccdc137	0	1.13293	5.4441	35.9664	2.00893e-09	8.92652e-08
Ccdc15	0	-0.819242	5.8215	21.4218	3.68643e-06	9.70151e-05
Ccdc157	0	1.77651	3.37711	9.80263	0.00174272	0.0223139
Ccdc174	0	1.49322	8.1653	300.795	2.31566e-67	1.11094e-64
Ccdc18	0	-1.04896	5.47279	26.7419	2.32612e-07	7.64682e-06
Ccdc187	0	2.62333	3.54428	26.0195	3.38103e-07	1.07688e-05
Ccdc34	0	-0.530666	7.02459	19.5487	9.80874e-06	0.000236395
Ccdc36	0	-3.2312	2.95375	9.01112	0.00268355	0.0319863
Ccdc62	0	-0.832177	5.43391	17.3263	3.14854e-05	0.00067793
Ccdc85c	0	-2.57672	3.73896	23.9407	9.938e-07	2.91161e-05
Ccdc90b	0	0.443455	6.06004	8.15072	0.00430458	0.0470683
Cchcr1	0	1.25804	4.73013	27.0161	2.01845e-07	6.69272e-06
Ccl25	0	0.759761	5.70018	19.1214	1.22684e-05	0.000288429
Ccnk	0	-1.36647	4.52201	21.0817	4.4021e-06	0.000114061
Ccnl2	0	-0.368978	7.36894	11.7845	0.000597297	0.00902974
Ccr3	0	1.93765	3.88735	25.6913	4.00769e-07	1.26207e-05
Ccser1	0	3.20622	5.01314	160.004	1.14408e-36	2.74435e-34
Cct3	0	-0.670669	7.44332	39.0107	4.21831e-10	2.00805e-08
Cd177	0	3.16794	3.53081	34.7456	3.75971e-09	1.60331e-07
Cd200	0	-0.235618	9.02595	11.5291	0.000685203	0.0101448
Cd320	0	0.682898	6.61104	27.0831	1.94977e-07	6.49301e-06
Cd38	0	-1.85996	4.28316	28.7107	8.40742e-08	2.96714e-06
Cd47	0	-2.24267	8.32138	545.237	1.59272e-120	1.63009e-117
Cd55	0	0.47536	5.96325	8.79045	0.00302825	0.0353591
Cd83	0	-0.565182	6.66633	17.5959	2.73229e-05	0.000594559
Cd99l2	0	-0.657162	7.18589	32.4443	1.22731e-08	4.89392e-07
Cdc123	0	0.524174	6.53687	15.333	9.01395e-05	0.00173194
Cdc23	0	-0.46913	6.52481	11.277	0.00078478	0.0113553
Cdc7	0	-0.726779	4.94889	9.5018	0.00205281	0.0258017
Cdh1	0	5.45725	3.61966	73.6752	9.23502e-18	9.00165e-16
Cdh18	0	0.550892	6.30993	14.5344	0.000137642	0.00253368
Cdh7	0	0.393371	7.17486	12.2304	0.000470223	0.00739259
Cdipt	0	-5.6479	6.437	435.09	1.39657e-96	1.04586e-93
Cdk12	0	0.567103	6.78364	20.6564	5.49672e-06	0.00013948
Cdkal1	0	-0.655234	6.18396	17.2686	3.24565e-05	0.000696397
Cdkl5	0	-0.672985	5.71034	13.6065	0.000225423	0.0038906
Cdv3	0	1.6121	6.53843	136.569	1.51263e-31	2.921e-29
Cdyl2	0	2.22221	3.26821	12.1705	0.000485552	0.00760343
Ceacam19	0	-4.1951	3.73702	41.4031	1.23974e-10	6.21978e-09
Cebpzos	0	-0.584444	6.73385	19.8419	8.41373e-06	0.000205354
Celf2	0	0.368805	8.18332	19.511	1.00043e-05	0.000240167
Celf3	0	-0.373553	7.64418	14.2285	0.000161921	0.00292621
Celsr3	0	-0.744514	5.37822	13.2022	0.000279649	0.00470484
Cenpa	0	3.02037	3.93256	59.1479	1.46527e-14	1.06359e-12
Cenpq	0	0.926535	7.43651	81.2956	1.95034e-19	2.13869e-17
Cep104	0	0.65372	4.96541	8.61043	0.0033426	0.0384098
Cep112it	0	-1.37643	4.24101	16.8304	4.08788e-05	0.0008521
Cep126	0	1.00738	5.33941	26.2324	3.02819e-07	9.74606e-06
Cep135	0	2.05765	4.9938	78.2008	9.3377e-19	9.75186e-17
Cep170	0	-0.760773	7.95769	66.3201	3.84205e-16	3.25874e-14
Cep192	0	-0.662511	5.65684	12.717	0.000362378	0.00589013
Cep250	0	-1.52995	5.66087	58.6634	1.87433e-14	1.3573e-12
Cep290	0	-0.55624	7.13566	22.7238	1.87089e-06	5.15192e-05
Cep350	0	-0.398529	7.12523	11.7087	0.00062215	0.0093548
Cercam	0	-1.23609	4.13049	12.5314	0.000400201	0.00644014
Cers4	0	0.65841	5.94177	16.4688	4.94662e-05	0.00101119
Cers5	0	-0.822316	5.9464	23.2299	1.43791e-06	4.07276e-05
Cers6	0	-0.48159	6.46316	11.3161	0.000768421	0.0111606
Cetn3	0	0.386512	7.5345	14.8956	0.000113641	0.00213932
Cetn4	0	-0.889901	4.87157	12.952	0.000319614	0.00529026
Cfap46	0	-0.668601	6.22134	18.338	1.85013e-05	0.000418926
Cfap53	0	1.04997	5.15305	25.3393	4.80988e-07	1.48874e-05
Cfap54	0	1.27374	4.71555	26.4399	2.71971e-07	8.79937e-06
Cfap61	0	-2.88961	6.97268	348.973	7.54739e-78	4.72929e-75
Cfap70	0	1.02184	3.97376	8.82269	0.00297521	0.0349334
Cfap74	0	0.641433	5.86817	14.9729	0.000109083	0.00205983
Cfap97	0	-0.542296	7.77204	31.5672	1.92762e-08	7.40747e-07
Cfh	0	-0.977473	4.42731	10.7182	0.00106094	0.0146405
Cfl1	0	-1.84119	8.04972	345.698	3.89499e-77	2.39183e-74
Cfl2	0	-0.389768	7.04448	10.8507	0.000987649	0.0137902
Cfp	0	-1.54162	3.75743	11.4095	0.000730741	0.0107114
Cggbp1	0	0.468161	7.17512	17.8753	2.35909e-05	0.000519983
Chd1	0	-0.770965	7.00853	39.0147	4.20968e-10	2.00705e-08
Chd3os	0	-0.989936	6.80483	55.5235	9.24989e-14	6.33948e-12
Chd4	0	0.375675	8.49507	23.0487	1.57995e-06	4.41238e-05
Chd5	0	1.14037	8.88513	252.448	7.8508e-57	3.44359e-54
Chdh	0	0.715827	5.42683	13.7775	0.000205813	0.00359663
Cherp	0	-0.577727	6.54259	17.1078	3.53231e-05	0.000747457
Chga	0	-0.211149	8.74248	8.1312	0.00435118	0.0475271
Chic1	0	0.995223	6.1896	43.2165	4.90555e-11	2.58354e-09
Chka	0	-0.475874	6.569	11.8715	0.000570035	0.00868405
Chl1	0	-0.40555	8.87534	31.2195	2.30563e-08	8.75057e-07
Chm	0	-0.441223	6.83564	12.0784	0.000510125	0.00793861
Chml	0	0.769623	5.02417	11.9534	0.000545522	0.00837486
Chp1	0	3.49031	4.58218	132.783	1.0177e-30	1.89378e-28
Chpt1	0	-0.500357	5.82119	8.24138	0.00409478	0.0451441
Chrm1	0	-1.24455	4.04296	11.1578	0.000836873	0.0119904
Chsy3	0	0.982483	6.61854	55.1687	1.10795e-13	7.55966e-12
Chtop	0	0.718536	6.97293	37.543	8.94855e-10	4.1379e-08
Chuk	0	-1.1188	5.1444	23.9523	9.87855e-07	2.89695e-05
Ciapin1	0	-0.459039	6.32167	9.56616	0.00198208	0.025008
Cirbp	0	0.544861	8.41739	48.0799	4.09709e-12	2.41917e-10
Cisd2	0	-0.312879	7.72306	10.4081	0.00125475	0.0169121
Cisd3	0	0.550397	6.56503	17.1916	3.37976e-05	0.00072014
Cited2	0	0.653714	6.1761	19.1221	1.2264e-05	0.000288429
Ciz1	0	0.62816	5.40604	10.8297	0.000998911	0.0139159
Ckap4	0	-0.512566	6.08873	10.2107	0.00139635	0.018464
Ckmt1	0	-1.27726	7.50326	134.248	4.86706e-31	9.11209e-29
Clcn5	0	-0.865239	5.40025	18.0867	2.11111e-05	0.000470047
Clcn7	0	-0.772444	5.54477	15.8577	6.82975e-05	0.00135116
Cldn10	0	-0.889913	4.45439	9.33349	0.00225016	0.0278248
Clgn	0	1.04279	4.00905	9.4945	0.002061	0.0258712
Clic5	0	1.36795	3.63078	9.32649	0.00225876	0.0279199
Clip4	0	0.464518	6.01259	8.70142	0.00317977	0.0367451
Clk1	0	-0.419878	8.13734	23.3917	1.32189e-06	3.7826e-05
Clmn	0	-1.55902	4.45568	25.7751	3.83754e-07	1.21097e-05
Clp1	0	3.10444	3.7242	44.7249	2.26999e-11	1.23797e-09
Clu	0	0.190256	10.0805	11.7177	0.000619119	0.00931378
Cmc1	0	0.974536	4.86773	17.9277	2.29501e-05	0.000507263
Cmtm4	0	-0.879255	5.4479	19.1421	1.21364e-05	0.000286204
Cndp2	0	-2.24102	3.943	25.9095	3.57943e-07	1.13771e-05
Cnih2	0	0.342348	8.09835	16.0851	6.05672e-05	0.0012115
Cnih3	0	0.997935	4.07985	9.40205	0.00216755	0.0269661
Cnot6l	0	-0.663826	6.4634	21.3621	3.80317e-06	9.96873e-05
Cnot7	0	0.938872	5.9319	33.3442	7.7256e-09	3.15435e-07
Cnpy2	0	0.281195	8.26311	11.8568	0.000574549	0.0087418
Cntn3	0	-0.597193	5.3234	8.4648	0.00362101	0.0408298
Cntnap1	0	-0.763294	7.81451	61.2665	4.99476e-15	3.78665e-13
Cntnap2	0	-0.310078	7.53406	9.1723	0.00245719	0.0298203
Cntrob	0	0.76843	4.82957	10.7307	0.0010538	0.0145617
Coa5	0	-2.29734	4.9569	66.4933	3.51892e-16	3.00124e-14
Cobl	0	-0.480894	6.38508	10.6435	0.00110465	0.0151822
Cog1	0	-0.851555	7.02482	48.2091	3.83573e-12	2.27799e-10
Cog5	0	0.61708	5.44675	10.7125	0.00106422	0.0146792
Cog6	0	0.608257	5.38506	9.86509	0.00168454	0.021732
Col11a1	0	-0.911578	6.13717	32.037	1.51344e-08	5.94229e-07
Col16a1	0	1.29698	5.4287	46.4616	9.35381e-12	5.26006e-10
Col4a4	0	1.73638	4.17674	29.4939	5.61197e-08	2.03676e-06
Col7a1	0	1.33017	3.70602	10.1775	0.00142177	0.0187391
Commd10	0	-0.621649	5.14964	8.12457	0.00436711	0.0476502
Commd7	0	0.500969	6.75675	15.9503	6.50377e-05	0.00129238
Commd8	0	0.546014	6.27934	14.1227	0.000171289	0.0030684
Comt	0	0.43017	6.1358	8.02565	0.00461214	0.0498806
Copa	0	-0.317842	7.43089	9.11805	0.00253112	0.0305366
Copg1	0	0.458349	6.39503	10.6436	0.0011046	0.0151822
Coq10a	0	0.409465	6.35677	8.30763	0.00394805	0.043873
Coq2	0	-0.57178	6.46398	15.907	6.65403e-05	0.00131895
Coq6	0	0.65954	5.33615	11.5107	0.000692025	0.01024
Coq7	0	-0.356397	6.97739	8.69863	0.00318465	0.0367876
Cox15	0	-0.67872	5.56884	12.7057	0.000364577	0.00591961
Cox6c	0	0.380078	9.43282	37.0185	1.17102e-09	5.35841e-08
Cox7b	0	-1.23448	7.78543	150.686	1.24166e-34	2.64748e-32
Cp	0	0.869883	4.28539	8.73325	0.00312474	0.0362284
Cpne2	0	2.33777	5.12295	110.224	8.80522e-26	1.36543e-23
Cpsf4	0	-0.684457	5.03454	8.8639	0.0029088	0.0342979
Cpsf7	0	0.996062	6.28937	47.0904	6.78654e-12	3.88033e-10
Cradd	0	-1.48502	3.96496	14.4278	0.000145653	0.00266516
Crhr1	0	1.01819	4.0328	9.43077	0.00213387	0.0266443
Crim1	0	-0.780118	6.57297	31.1298	2.41461e-08	9.11909e-07
Crip2	0	-0.525283	7.01068	18.9528	1.34022e-05	0.000312929
Crlf3	0	1.37005	4.34735	22.1889	2.47167e-06	6.63956e-05
Crybg2	0	-1.44293	3.84543	11.3357	0.000760366	0.0110698
Crybg3	0	-3.63294	3.97788	48.463	3.3699e-12	2.02881e-10
Cryzl1	0	-0.390451	7.24424	12.2602	0.000462758	0.00730891
Cs	0	7.2182	4.84053	283.061	1.68385e-63	7.71657e-61
Csnk1g1	0	-0.699293	6.19133	19.6251	9.42454e-06	0.000227672
Cspp1	0	-0.318462	8.16601	13.6662	0.000218371	0.00379234
Cst3	0	0.192524	10.2916	12.9299	0.000323406	0.00534726
Ctage5	0	1.13345	6.93697	89.681	2.81007e-21	3.49313e-19
Ctdsp2	0	1.94372	6.50528	190.366	2.69546e-43	8.03509e-41
Ctdspl2	0	0.68947	7.35286	42.1983	8.25503e-11	4.21034e-09
Ctnnb1	0	0.690244	8.61308	84.3713	4.11573e-20	4.64593e-18
Ctnnd1	0	1.32491	6.58403	97.2362	6.18328e-23	8.2544e-21
Ctsa	0	0.557944	6.59175	17.9265	2.29643e-05	0.000507263
Ctsb	0	-0.550304	8.07969	38.376	5.83924e-10	2.74141e-08
Cuta	0	-0.433957	6.90072	12.2241	0.000471815	0.00741003
Cwc22	0	-2.53364	6.63326	232.639	1.62862e-52	6.32977e-50
Cwh43	0	3.31996	2.93303	11.6212	0.000652095	0.0097383
Cxadr	0	-0.315501	7.31122	8.32786	0.00390433	0.0435289
Cyb5b	0	0.467125	6.82427	14.4832	0.000141429	0.00259715
Cyb5d2	0	-1.08205	5.75535	33.8461	5.96839e-09	2.4717e-07
Cyfip1	0	-1.43275	6.74196	103.117	3.17666e-24	4.60077e-22
Cyp2d26	0	8.75027	6.1844	710.454	2.06114e-156	3.16427e-153
Cyp2d37-ps	0	-4.83035	3.64317	41.8621	9.80342e-11	4.97527e-09
Cyp2t4	0	2.99485	3.60774	35.4066	2.67759e-09	1.16449e-07
Cyp46a1	0	0.488166	7.30684	21.0767	4.41362e-06	0.000114263
Cyp4a12a	0	-5.4556	3.94996	68.3716	1.35744e-16	1.19767e-14
Cyp4f13	0	3.21949	4.15859	77.7849	1.1526e-18	1.19156e-16
Cyp4f17	0	-4.53075	3.40734	29.0988	6.88107e-08	2.451e-06
Cyp4f40	0	-2.95471	2.97961	8.04142	0.00457215	0.0495004
Cyp4x1os	0	-1.79291	3.78363	15.1199	0.000100905	0.00191483
D030028A08Rik	0	0.695367	5.33559	12.6215	0.000381378	0.00616957
D230025D16Rik	0	0.47231	6.06823	9.22921	0.00238197	0.0291146
D3Ertd254e	0	-0.415116	6.3932	8.24296	0.00409122	0.045121
D3Ertd751e	0	0.54048	5.58859	8.98374	0.00272407	0.0323808
D430036J16Rik	0	-1.86016	3.51679	10.2209	0.00138864	0.018378
D430041D05Rik	0	-0.474146	5.98828	8.16619	0.00426803	0.0467352
D730003I15Rik	0	1.97595	4.87871	68.4659	1.2941e-16	1.14838e-14
D7Bwg0826e	0	2.83489	3.36101	21.8339	2.97384e-06	7.90551e-05
D830024N08Rik	0	1.02656	7.69906	111.326	5.05147e-26	8.16317e-24
D8Ertd738e	0	0.398221	6.9573	11.3591	0.000750852	0.0109526
D930015M05Rik	0	1.75823	4.19374	30.693	3.02406e-08	1.13371e-06
Dab2ip	0	-0.65944	6.00476	15.7917	7.07214e-05	0.00139462
Dact2	0	-0.829698	5.24242	14.8327	0.000117494	0.00220239
Daglb	0	-0.92558	5.87372	27.4848	1.58396e-07	5.38581e-06
Dapk1	0	-0.964388	6.667	48.2169	3.82055e-12	2.27338e-10
Dapk3	0	-1.73182	4.32583	27.0574	1.97586e-07	6.57278e-06
Dapp1	0	2.89473	2.95973	10.2525	0.00136509	0.0181288
Dbndd2	0	0.637344	6.52728	22.343	2.28104e-06	6.17611e-05
Dcaf11	0	0.364126	6.8453	8.80089	0.00301097	0.0352186
Dcaf17	0	-0.702263	5.38434	11.9042	0.000560124	0.00857233
Dcaf4	0	-1.22253	4.05247	11.3479	0.00075539	0.0110078
Dcbld2	0	0.633402	5.67666	13.0937	0.00029632	0.00495546
Dcdc2b	0	-3.53056	6.00178	239.24	5.93291e-54	2.46168e-51
Dclre1a	0	1.20659	6.46703	75.7776	3.1844e-18	3.22686e-16
Dclre1c	0	1.37738	4.03334	16.8976	3.9458e-05	0.000827045
Dcp1a	0	0.732164	4.86466	9.86718	0.00168264	0.0217257
Dcst1	0	-2.66255	3.46051	16.7223	4.32766e-05	0.000899029
Dctn1	0	0.582086	7.72223	37.0975	1.12449e-09	5.16088e-08
Dctn2	0	0.470004	7.32686	19.7699	8.73658e-06	0.000212895
Dctn4	0	0.827319	7.29709	59.4468	1.25878e-14	9.20228e-13
Ddx11	0	-2.52335	6.28289	188.545	6.72819e-43	1.93068e-40
Ddx18	0	-0.330932	7.33115	9.35157	0.00222807	0.0276072
Ddx23	0	0.951685	6.38656	45.7501	1.34489e-11	7.4537e-10
Ddx27	0	0.759191	5.84465	20.846	4.97848e-06	0.000128023
Ddx39	0	0.684759	5.38963	12.8122	0.0003444	0.00564492
Ddx5	0	-0.340941	9.21928	26.3876	2.79429e-07	9.03116e-06
Ddx51	0	-0.552374	5.97195	10.8756	0.000974442	0.0136369
Ddx6	0	-0.781871	7.56527	56.2644	6.3458e-14	4.40818e-12
Def8	0	-0.821302	5.48245	17.0201	3.69919e-05	0.000779547
Dennd1a	0	0.740099	7.33326	48.3458	3.57748e-12	2.14119e-10
Denr	0	-0.778529	8.17101	78.7677	7.00875e-19	7.36975e-17
Dera	0	-0.968886	4.24831	8.81649	0.00298534	0.035039
Derl3	0	0.397268	6.95976	11.3171	0.000768019	0.0111601
Det1	0	4.56286	3.17598	31.6178	1.87806e-08	7.25331e-07
Dexi	0	-0.731957	5.49709	13.9476	0.000188001	0.00333471
Dffb	0	-0.713769	4.8964	8.75024	0.00309577	0.0359911
Dgat1	0	0.865909	6.07239	31.6411	1.85563e-08	7.17573e-07
Dgcr6	0	-1.32053	5.96618	54.1754	1.83654e-13	1.2312e-11
Dgcr8	0	0.503696	5.90239	9.51622	0.00203675	0.0256297
Dgke	0	-0.43831	6.83386	11.8767	0.000568455	0.00867284
Dgkz	0	-0.871784	6.97779	48.4149	3.45364e-12	2.07516e-10
Dguok	0	0.742015	5.52968	16.4755	4.92894e-05	0.00100932
Dhdds	0	-0.720782	6.02655	18.6927	1.53602e-05	0.000352482
Dhrs1	0	0.991327	5.2716	24.6264	6.96167e-07	2.0956e-05
Dhx15	0	0.430154	7.00089	13.5919	0.000227192	0.00391233
Dhx29	0	-2.44728	6.5034	207.306	5.43646e-47	1.89683e-44
Dhx30	0	-0.356556	7.31894	10.6974	0.00107291	0.0147823
Dhx36	0	-0.403532	9.17577	35.6923	2.31238e-09	1.01718e-07
Dhx9	0	-0.543155	6.58105	15.4282	8.57123e-05	0.00165829
Dicer1	0	-0.401927	6.55212	8.50656	0.00353884	0.0401095
Dis3l2	0	-2.73332	4.73613	74.3562	6.54078e-18	6.41624e-16
Dixdc1	0	0.650808	6.83138	27.7979	1.34728e-07	4.62201e-06
Dkkl1	0	1.24418	4.54963	22.9953	1.62443e-06	4.526e-05
Dlc1	0	1.1276	5.40577	34.1298	5.15867e-09	2.16087e-07
Dld	0	0.341879	7.04298	8.765	0.00307082	0.0357823
Dlg2	0	0.28972	8.10915	11.4458	0.000716629	0.0105279
Dlk1	0	-0.388784	7.79013	16.42	5.07542e-05	0.00103545
Dlst	0	0.520856	6.79802	17.2911	3.20747e-05	0.000689169
Dlx2	0	0.674846	6.42575	23.9147	1.0073e-06	2.94554e-05
Dmc1	0	3.03108	3.21413	19.0447	1.27721e-05	0.000299355
Dmtf1	0	-1.00298	6.60618	50.4357	1.233e-12	7.67912e-11
Dnah11	0	-2.01578	3.58697	13.9649	0.000186276	0.0033104
Dnah5	0	1.56169	3.87445	17.1449	3.46394e-05	0.000736542
Dnajb4	0	-0.44457	7.68114	20.1147	7.29519e-06	0.000180784
Dnajc1	0	0.576478	6.42069	16.6194	4.56895e-05	0.000944679
Dnajc11	0	0.721757	5.54134	15.7273	7.31696e-05	0.00143736
Dnajc12	0	-1.49579	6.72801	110.338	8.31411e-26	1.29582e-23
Dnajc15	0	-0.499727	5.929	8.75838	0.00308197	0.0358715
Dnajc17	0	-0.509082	6.20788	10.9076	0.000957764	0.0134402
Dnajc2	0	-0.312323	7.51791	9.11281	0.00253838	0.0305881
Dnajc25	0	-0.794078	5.25605	13.9596	0.000186802	0.00331727
Dnajc30	0	-0.841963	5.08734	13.6881	0.000215843	0.00375907
Dnm3	0	0.457136	7.86327	24.714	6.65208e-07	2.01029e-05
Dnmbp	0	1.02619	4.02652	9.29889	0.00229305	0.0282839
Dnpep	0	0.334209	8.61232	19.5229	9.94245e-06	0.000239055
Dnph1	0	-0.901502	4.70329	11.6886	0.000628905	0.00943326
Donson	0	-1.33836	7.37676	136.506	1.56143e-31	2.99637e-29
Dph3	0	-4.19199	3.78082	43.8201	3.60362e-11	1.93099e-09
Dph5	0	-1.2424	5.9914	50.2355	1.36543e-12	8.45248e-11
Dpm2	0	-0.611065	6.36768	17.1243	3.5018e-05	0.000742807
Dpp10	0	0.600152	7.44568	34.3277	4.6601e-09	1.97357e-07
Dpp6	0	-0.339429	8.94251	22.4286	2.18164e-06	5.91742e-05
Dpy19l4	0	1.05058	6.74298	67.4118	2.20849e-16	1.92095e-14
Dpysl2	0	-0.818385	9.89582	190.315	2.76425e-43	8.1609e-41
Dpysl5	0	-0.578652	5.95122	11.8195	0.000586189	0.00888318
Dram2	0	-0.871578	6.3139	31.8973	1.62636e-08	6.35315e-07
Drc1	0	0.93973	4.89255	16.8987	3.94345e-05	0.000827045
Drg1	0	-1.52612	5.89867	66.7359	3.11154e-16	2.67501e-14
Drosha	0	-0.614117	5.67864	11.2504	0.000796107	0.0114975
Dtnbp1	0	0.506819	5.84647	9.41442	0.00215297	0.0268174
Dus3l	0	-0.654777	5.79799	13.8188	0.000201334	0.00353648
Dusp11	0	0.988425	7.7478	109.352	1.36751e-25	2.07862e-23
Dusp15	0	-1.10092	5.6015	31.2505	2.26909e-08	8.62255e-07
Dut	0	0.855861	6.29629	35.029	3.25048e-09	1.39584e-07
Dvl1	0	0.403694	6.79342	10.5958	0.00113354	0.0154892
Dync1li1	0	-0.386873	7.14031	11.2478	0.000797227	0.0115028
Dync2h1	0	0.925905	6.93915	59.5075	1.22058e-14	8.94431e-13
Dynlt1b	0	-0.813921	5.94917	23.1715	1.48224e-06	4.1683e-05
Dzank1	0	-0.23977	9.12297	12.4806	0.000411238	0.00659355
Dzip1	0	-0.460188	6.05743	8.09776	0.00443219	0.0482574
Dzip1l	0	0.778598	5.18477	14.2029	0.00016414	0.00296108
E130116L18Rik	0	-1.07489	4.74547	16.28	5.46466e-05	0.00110602
E130307A14Rik	0	-2.64685	3.80097	26.4822	2.66078e-07	8.65432e-06
E230029C05Rik	0	-1.34544	4.50353	20.5639	5.7688e-06	0.000146022
E2f5	0	1.43431	4.91452	39.3336	3.57545e-10	1.7207e-08
E430024P14Rik	0	-3.14776	2.97968	9.12168	0.00252611	0.0304932
E4f1	0	0.88409	5.58155	24.1119	9.09254e-07	2.68957e-05
Eapp	0	-0.696964	6.57219	24.9651	5.83989e-07	1.78238e-05
Ears2	0	-1.58214	6.18422	84.9521	3.06829e-20	3.54168e-18
Ebf1	0	-0.699859	5.27012	10.7533	0.001041	0.0144042
Echs1	0	0.629467	6.2692	18.6371	1.58145e-05	0.000362365
Edil3	0	-0.331186	7.7468	11.7402	0.000611684	0.00921547
Efcab7	0	-1.92086	4.65732	41.7799	1.02242e-10	5.1632e-09
Efemp2	0	-0.908653	4.89797	13.6098	0.000225033	0.00388606
Efhc1	0	3.99145	3.0259	19.629	9.40509e-06	0.000227381
Efnb2	0	0.523424	6.03194	10.987	0.000917576	0.0129724
Efnb3	0	0.363909	6.85628	8.89455	0.00286036	0.0338545
Efr3b	0	-0.815184	6.581	33.4871	7.17824e-09	2.93476e-07
Egfl8	0	2.03132	3.17145	8.51602	0.00352049	0.0400009
Egr1	0	-1.15161	6.51535	60.4617	7.51691e-15	5.62925e-13
Ehbp1l1	0	-1.29981	4.74099	23.2468	1.42529e-06	4.04083e-05
Ehmt1	0	0.501537	7.11964	19.6373	9.3642e-06	0.000226749
Ei24	0	1.56487	6.8318	156.344	7.21042e-36	1.65216e-33
Eid1	0	0.22062	8.82581	9.46937	0.00208942	0.0261638
Eid2	0	-0.350098	7.42437	11.0418	0.000890892	0.0126346
Eif1	0	-1.16658	9.47989	318.551	3.15614e-71	1.64248e-68
Eif2b2	0	-0.518502	6.66883	15.1354	0.000100082	0.00190039
Eif3h	0	2.43535	6.5006	282.943	1.7865e-63	8.06657e-61
Eif3i	0	-1.3443	6.00208	56.6351	5.25554e-14	3.69259e-12
Eif3j1	0	0.907444	7.18584	67.6148	1.99244e-16	1.7429e-14
Eif3k	0	-1.11001	7.10786	82.4445	1.09063e-19	1.20456e-17
Eif4enif1	0	0.555747	5.44637	8.65465	0.00326243	0.0375871
Eif5	0	-0.250861	8.35197	9.4381	0.00212535	0.0265704
Eif5b	0	-0.86557	8.51705	114.877	8.43139e-27	1.39181e-24
Elmo2	0	-0.61883	5.6262	10.9866	0.000917816	0.0129724
Elmod2	0	-0.952389	6.06352	32.7366	1.05594e-08	4.2604e-07
Elmsan1	0	0.913483	5.18674	19.6099	9.49964e-06	0.000229306
Elof1	0	-0.395067	6.7648	9.41041	0.00215769	0.0268652
Elovl4	0	-0.515757	6.36847	12.1052	0.000502859	0.00783784
Emb	0	4.60693	4.70662	200.365	1.77475e-45	5.73598e-43
Emc10	0	1.17986	6.79404	89.3957	3.24589e-21	4.01862e-19
Endov	0	-1.95409	3.41016	9.83925	0.00170837	0.021984
Enkur	0	0.948854	4.14808	9.18263	0.00244336	0.0296995
Eno1	0	1.53364	8.50124	378.085	3.49671e-84	2.49681e-81
Eno2	0	-0.25871	8.28967	9.78765	0.00175698	0.022487
Enoph1	0	0.673872	6.33083	22.1803	2.4828e-06	6.65781e-05
Enpp5	0	-0.317809	8.85658	19.5127	9.99555e-06	0.000240143
Ensa	0	-0.332455	7.62783	11.1457	0.000842326	0.0120572
Entpd5	0	-0.759958	5.19354	12.2775	0.000458501	0.00726035
Epb41	0	-0.550865	5.89189	10.3269	0.00131115	0.0175186
Epb41l3	0	-0.345633	7.08835	8.74222	0.0031094	0.0361103
Epb41l5	0	0.940103	4.93436	17.1115	3.52541e-05	0.000746511
Eps15	0	0.562941	6.39458	16.1282	5.92043e-05	0.00118733
Eps8l1	0	-2.80393	3.65574	24.7766	6.43954e-07	1.95375e-05
Eqtn	0	3.21199	2.83718	10.3615	0.00128676	0.0172602
Eral1	0	-0.900337	4.41996	9.29297	0.00230048	0.028354
Erh	0	0.935225	8.23806	128.111	1.07044e-29	1.87811e-27
Eri2	0	-1.92649	5.09606	56.4736	5.70539e-14	3.98133e-12
Erlec1	0	-0.404098	7.80034	18.0043	2.20452e-05	0.00048978
Ermard	0	2.07179	5.00523	84.0346	4.87971e-20	5.48816e-18
Esf1	0	-0.471706	9.33133	52.2548	4.88175e-13	3.18914e-11
Etfbkmt	0	2.82773	5.98795	250.969	1.64919e-56	7.13194e-54
Etfdh	0	-0.78062	5.69303	17.9801	2.2327e-05	0.000495323
Etfrf1	0	-1.61015	5.24794	47.6367	5.13606e-12	2.99805e-10
Etl4	0	-0.625692	5.73545	12.0492	0.000518192	0.00802349
Ets2	0	-0.526623	5.69765	8.30809	0.00394706	0.043873
Evc2	0	-2.92734	3.17056	11.3011	0.00077468	0.0112351
Evi2	0	-1.54252	3.80554	12.2535	0.000464422	0.00732765
Evi2a	0	-0.871473	5.09275	14.3753	0.000149775	0.0027292
Evi5	0	-0.661966	6.56001	22.3284	2.29845e-06	6.21777e-05
Exd2	0	1.54881	4.47535	32.6126	1.12547e-08	4.51718e-07
Exoc3	0	0.386194	6.76996	9.50169	0.00205295	0.0258017
Exoc3l	0	-1.72368	3.66007	12.1703	0.000485615	0.00760343
Exosc1	0	0.758905	6.22689	26.662	2.42434e-07	7.94475e-06
Exosc8	0	0.641207	6.17036	18.1196	2.07493e-05	0.000462663
Extl3	0	-1.35817	5.77133	51.0957	8.80944e-13	5.53139e-11
Faf1	0	0.657633	6.14875	19	1.30746e-05	0.000305978
Faim2	0	-0.390593	8.73966	27.6895	1.42494e-07	4.86665e-06
Fam120b	0	0.501089	6.25409	11.5555	0.000675553	0.0100263
Fam126a	0	1.15456	4.55831	19.9088	8.12436e-06	0.000199082
Fam135a	0	-0.475254	6.28916	9.85216	0.00169643	0.0218578
Fam136b-ps	0	-5.44994	4.15567	72.5851	1.60423e-17	1.52497e-15
Fam173b	0	-1.56381	5.32605	49.1135	2.41883e-12	1.47649e-10
Fam189a1	0	-0.609709	5.41016	9.20966	0.00240754	0.0293338
Fam204a	0	0.361724	7.11896	10.285	0.00134122	0.0178814
Fam206a	0	-0.880731	4.58197	10.0423	0.00152996	0.0199304
Fam207a	0	-0.692891	5.53116	12.8258	0.000341897	0.00560769
Fam213b	0	-0.426794	6.71394	10.634	0.00111033	0.015233
Fam216b	0	2.33742	3.50885	19.6686	9.21201e-06	0.000223653
Fam229b	0	1.261	5.06223	34.2817	4.77141e-09	2.01238e-07
Fam49a	0	-0.640787	5.70959	12.3987	0.000429662	0.00684209
Fam76a	0	0.557956	5.88374	11.4587	0.000711665	0.0104657
Fam84b	0	-0.90635	4.322	8.74214	0.00310955	0.0361103
Fancc	0	2.8696	3.69447	38.489	5.51055e-10	2.59503e-08
Far1	0	-0.410191	6.92417	11.0892	0.000868377	0.012361
Far2	0	-0.688188	5.54781	12.7404	0.000357867	0.00582915
Fastk	0	0.841863	5.55946	21.4782	3.57959e-06	9.45037e-05
Fastkd1	0	-1.0527	6.89142	65.1288	7.03143e-16	5.80358e-14
Fastkd3	0	-0.660861	6.11288	16.8974	3.94614e-05	0.000827045
Faxc	0	0.538694	5.52033	8.44143	0.00366784	0.0411764
Fblim1	0	0.988572	4.16625	10.1498	0.00144329	0.0189785
Fbxl12os	0	-2.11714	3.36126	10.3088	0.00132407	0.0176757
Fbxl15	0	-0.498204	6.86949	15.75	7.22995e-05	0.00142209
Fbxl22	0	-1.56963	3.55584	8.92944	0.00280624	0.0332675
Fbxl5	0	-0.559447	7.38747	27.0497	1.98369e-07	6.59169e-06
Fbxl6	0	0.805802	6.09132	27.4897	1.57999e-07	5.37826e-06
Fbxo30	0	-1.2446	4.27042	14.3376	0.000152803	0.00277646
Fbxo41	0	0.991487	5.70246	32.3084	1.31615e-08	5.22783e-07
Fbxo44	0	-0.369329	7.9316	16.2769	5.47339e-05	0.00110635
Fbxo45	0	-0.948269	4.77209	13.5175	0.000236368	0.00404992
Fbxw2	0	-0.295041	7.83533	9.82055	0.00172583	0.0221437
Fbxw5	0	-0.445755	7.5852	19.418	1.05034e-05	0.00025097
Fermt2	0	-0.48499	6.80532	14.368	0.000150354	0.00273649
Fes	0	-2.92259	3.15444	11.0963	0.000865061	0.0123309
Fgf16	0	-2.44793	3.52226	16.5814	4.66127e-05	0.000962472
Fgf17	0	1.43929	3.49681	8.46575	0.00361913	0.0408298
Fibp	0	-0.480205	7.38827	19.9841	7.81069e-06	0.000192163
Fig4	0	1.10678	4.27616	14.079	0.000175314	0.00313138
Filip1	0	1.29385	3.70262	9.61882	0.00192604	0.0243865
Fiz1	0	-1.42985	4.80853	29.3332	6.09713e-08	2.19211e-06
Fkbp5	0	0.980455	4.24921	10.7334	0.00105224	0.0145466
Fkbp9	0	-3.27384	3.02351	10.1523	0.00144134	0.018961
Fkbpl	0	-6.34404	4.62807	135.755	2.27907e-31	4.29581e-29
Fktn	0	1.63423	5.16344	59.3519	1.32096e-14	9.63392e-13
Fn3krp	0	-0.798556	4.70112	9.34352	0.00223787	0.0276951
Fnbp1	0	-0.459594	7.26059	16.8861	3.96983e-05	0.000830877
Fndc3a	0	0.366167	7.109	10.3818	0.00127269	0.0171089
Fndc4	0	0.402839	7.23962	13.7178	0.000212451	0.00370631
Fnip2	0	1.12868	4.16452	12.999	0.000311682	0.00517291
Fos	0	-0.604913	6.09283	13.8782	0.000195073	0.00344225
Foxn2	0	5.04285	6.58544	612.884	3.19725e-135	3.7757e-132
Fpgs	0	-0.849127	4.98039	12.9905	0.00031311	0.00519381
Fpgt	0	-0.822624	5.03221	12.475	0.000412464	0.00660631
Frat2	0	-2.87016	4.10297	42.2548	8.02e-11	4.09727e-09
Frg1	0	-0.584018	6.32669	15.0555	0.000104412	0.00197648
Frmd4a	0	-0.858324	9.17745	149.579	2.1674e-34	4.55807e-32
Frmd6	0	-0.903656	4.92659	13.5622	0.000230811	0.00396134
Frrs1l	0	1.08026	6.83942	78.3065	8.85145e-19	9.2756e-17
Fry	0	-1.58726	7.19002	161.172	6.35756e-37	1.54923e-34
Fsip1	0	1.45042	3.98023	16.9008	3.9391e-05	0.000827045
Fth1	0	-0.190982	10.1688	12.0272	0.000524336	0.00811043
Ftl1	0	-0.340711	8.02657	14.7501	0.000122755	0.00228845
Fubp3	0	-0.837513	6.32534	30.2371	3.82517e-08	1.42017e-06
Fuk	0	-1.71855	3.44168	8.17762	0.00424121	0.0465245
Fus	0	-0.228327	9.73004	14.5348	0.000137614	0.00253368
Fuz	0	-1.01496	6.20936	40.369	2.10431e-10	1.03709e-08
Fxn	0	-2.49547	4.695	61.7325	3.94217e-15	3.02601e-13
Fzd3	0	0.53473	6.32649	13.8704	0.00019588	0.0034545
G3bp2	0	1.04434	8.39565	172.843	1.79839e-39	4.56345e-37
G6pc3	0	0.60598	7.07458	28.4885	9.43e-08	3.30902e-06
Gabra2	0	-0.383151	8.39568	22.4863	2.11702e-06	5.7574e-05
Gabrg2	0	-0.397065	7.72883	16.8276	4.09409e-05	0.000852815
Gad2	0	-0.257413	9.31412	15.6436	7.64798e-05	0.00149284
Gadd45g	0	-0.725239	4.94343	9.43631	0.00212743	0.0265855
Gak	0	-0.875213	6.2925	32.0859	1.47589e-08	5.80971e-07
Galm	0	2.41656	3.0908	9.76422	0.00177951	0.0227564
Galnt11	0	0.414642	8.11228	23.4647	1.27267e-06	3.64855e-05
Galnt6	0	1.3604	3.70367	10.4129	0.00125146	0.0168752
Galt	0	-0.796701	5.23686	13.4798	0.000241176	0.00412538
Gapdh	0	-0.201842	11.9315	22.7969	1.80111e-06	4.98211e-05
Gar1	0	1.14794	4.49698	18.5346	1.66881e-05	0.000380677
Gas6	0	-0.42327	6.73168	10.4404	0.00123295	0.0166695
Gas8	0	1.55619	4.13575	23.6961	1.12843e-06	3.27172e-05
Gba2	0	-0.836133	4.83014	11.359	0.000750888	0.0109526
Gcgr	0	0.972143	4.33981	11.6184	0.000653084	0.0097463
Gckr	0	-2.17009	3.71348	18.9426	1.34735e-05	0.000314115
Gcn1l1	0	1.76975	6.07875	121.36	3.21143e-28	5.53953e-26
Gcom1	0	0.850363	4.77282	12.7857	0.000349305	0.00570786
Gda	0	0.675421	5.14629	10.4018	0.001259	0.0169619
Gdap1	0	-0.469572	7.8068	24.1993	8.68897e-07	2.58264e-05
Gdi2	0	0.449945	8.20848	28.6591	8.63452e-08	3.04379e-06
Gemin7	0	4.74326	3.2905	39.4322	3.39931e-10	1.64366e-08
Gfm1	0	0.663317	5.28365	11.1428	0.000843649	0.0120706
Gfra4	0	1.05115	5.22157	26.6619	2.42451e-07	7.94475e-06
Ggct	0	-0.628232	5.8551	13.0255	0.00030731	0.0051114
Ggnbp1	0	1.00084	4.00079	8.47117	0.00360836	0.040762
Ggt7	0	-0.451282	6.88667	13.0881	0.000297209	0.00496221
Gigyf1	0	-1.05388	6.89487	65.7874	5.03435e-16	4.23492e-14
Gigyf2	0	-0.394865	8.02498	19.3731	1.07534e-05	0.000256146
Gipr	0	5.70082	7.46254	1181.31	1.4296e-258	4.87715e-255
Git2	0	-0.645875	6.08113	15.6361	7.67844e-05	0.00149688
Gja1	0	0.72036	5.90499	19.209	1.17187e-05	0.000277204
Gk	0	0.97644	4.49374	13.3808	0.000254238	0.00432438
Gkap1	0	0.435216	10.0871	61.7576	3.89236e-15	2.99526e-13
Glb1l	0	0.675345	5.56336	13.8536	0.000197642	0.00348021
Glipr2	0	-0.992826	4.37038	10.607	0.00112668	0.0154092
Gls	0	-0.448468	8.11917	26.1789	3.11322e-07	9.9779e-06
Gls2	0	0.535494	5.82371	10.1978	0.00140616	0.0185618
Glt1d1	0	0.688717	6.31603	22.9879	1.63074e-06	4.53946e-05
Gm10037	0	2.94263	3.0266	11.3087	0.000771523	0.0111982
Gm10069	0	-1.33358	4.04781	13.226	0.000276122	0.00465061
Gm10332	0	2.67779	3.4643	23.0477	1.58078e-06	4.41238e-05
Gm10461	0	2.03272	3.99041	31.9588	1.57561e-08	6.17061e-07
Gm10524	0	-0.603661	7.11062	26.1955	3.08655e-07	9.91313e-06
Gm10634	0	-3.13247	3.25062	14.6267	0.000131063	0.00242419
Gm10851	0	2.95074	2.8363	8.62453	0.00331681	0.038142
Gm11527	0	-1.84649	4.84506	45.8881	1.25345e-11	6.97207e-10
Gm11639	0	2.76855	3.3269	19.2326	1.15746e-05	0.00027443
Gm11729	0	-2.9549	3.60184	24.5527	7.23276e-07	2.17082e-05
Gm11802	0	4.54489	3.27168	33.7051	6.41718e-09	2.64119e-07
Gm12404	0	2.03163	3.80658	23.7102	1.12024e-06	3.25104e-05
Gm12709	0	2.98721	2.78628	8.39101	0.00377098	0.0422262
Gm12925	0	1.79528	3.94103	23.6239	1.17162e-06	3.38415e-05
Gm13267	0	3.09629	2.88513	9.94554	0.00161249	0.0208726
Gm13582	0	2.4397	3.08854	9.52891	0.00202271	0.0254844
Gm13629	0	0.761992	5.0552	12.4581	0.000416229	0.00665619
Gm13691	0	-4.36032	3.35762	26.2154	3.05487e-07	9.82166e-06
Gm13833	0	4.05474	5.62889	305.625	2.05585e-68	1.01811e-65
Gm14330	0	-2.43985	4.71421	61.0521	5.56928e-15	4.20146e-13
Gm15558	0	-4.55079	4.27584	84.4169	4.0219e-20	4.55677e-18
Gm15564	0	-2.51687	3.85694	27.5737	1.51285e-07	5.15543e-06
Gm15601	0	-1.65155	4.94838	41.9962	9.15377e-11	4.65327e-09
Gm15624	0	-0.832093	5.26782	15.2436	9.45094e-05	0.00180686
Gm15638	0	-3.17448	2.95486	8.88033	0.00288274	0.034056
Gm15689	0	2.88058	3.09254	13.2734	0.000269225	0.00454942
Gm15832	0	2.37741	3.07073	8.84505	0.00293899	0.034614
Gm15886	0	-0.641921	5.30914	9.36054	0.00221718	0.0275056
Gm15903	0	1.49736	3.55712	9.83107	0.00171599	0.0220543
Gm16049	0	3.50462	3.41232	32.2977	1.32341e-08	5.24987e-07
Gm16054	0	-0.714228	5.67089	14.768	0.000121595	0.0022682
Gm16183	0	-2.34121	3.22713	9.71037	0.00183241	0.0233745
Gm16277	0	-4.28875	5.3158	178.043	1.31764e-40	3.37141e-38
Gm16283	0	3.19042	3.74592	47.8014	4.72221e-12	2.767e-10
Gm16286	0	-0.580893	5.7912	10.8611	0.000982144	0.0137259
Gm1661	0	-2.5907	3.1109	8.28706	0.00399303	0.0442599
Gm16701	0	1.59319	3.42957	9.0601	0.0026126	0.0312982
Gm16759	0	-2.97823	3.19119	12.2639	0.000461845	0.00729825
Gm16794	0	2.58136	4.12888	56.6407	5.24054e-14	3.6905e-12
Gm16982	0	-0.555414	6.91155	19.2232	1.16314e-05	0.00027535
Gm17080	0	-2.59304	3.15638	8.68731	0.00320449	0.0369611
Gm17191	0	-1.28369	4.05713	12.0888	0.000507304	0.00790273
Gm17275	0	-2.8254	3.55739	21.299	3.9303e-06	0.000102878
Gm17435	0	0.997255	4.00752	8.45184	0.00364692	0.0409864
Gm17477	0	1.04737	5.22425	26.0765	3.28268e-07	1.04773e-05
Gm17745	0	3.01589	2.86013	9.23912	0.00236911	0.0289691
Gm17949	0	1.26727	4.35577	19.9697	7.86956e-06	0.000193456
Gm19938	0	-1.78389	4.11278	22.7793	1.81769e-06	5.01891e-05
Gm20388	0	-1.6617	5.84596	75.4537	3.75183e-18	3.75232e-16
Gm20389	0	-4.72726	3.52036	35.2369	2.92131e-09	1.26689e-07
Gm20403	0	-4.59485	3.47446	32.2876	1.33035e-08	5.2706e-07
Gm20501	0	1.03442	3.98326	9.02456	0.0026639	0.0317916
Gm20536	0	-3.27873	6.51039	280.652	5.63612e-63	2.50799e-60
Gm20609	0	-2.12498	4.67589	51.216	8.28552e-13	5.22379e-11
Gm20616	0	-4.25494	3.40675	25.1773	5.2312e-07	1.60941e-05
Gm20680	0	1.95409	3.28787	10.181	0.00141908	0.0187162
Gm20695	0	-0.712034	4.97429	9.30036	0.0022912	0.0282754
Gm20700	0	5.22217	3.57595	64.2032	1.12471e-15	9.01651e-14
Gm20715	0	-5.42933	6.01159	326.941	4.70787e-73	2.62819e-70
Gm20731	0	3.80881	3.04823	17.8029	2.45053e-05	0.000538976
Gm20754	0	0.652381	5.668	13.8532	0.000197677	0.00348021
Gm21781	0	-2.06058	3.9545	22.9354	1.67588e-06	4.66088e-05
Gm21846	0	-0.638708	5.30434	9.25179	0.00235277	0.0288421
Gm21969	0	-3.58487	3.95784	47.5482	5.37321e-12	3.1246e-10
Gm21988	0	2.92741	8.64474	1225.33	4.10204e-268	2.09915e-264
Gm22314	0	3.09681	2.83727	9.70947	0.00183332	0.0233763
Gm24011	0	-2.04602	3.53414	12.9857	0.000313906	0.00520419
Gm2415	0	2.59884	3.00416	9.22449	0.00238812	0.0291202
Gm24336	0	1.81173	5.48015	85.793	2.00555e-20	2.35033e-18
Gm24346	0	1.4084	3.92286	15.3889	8.7515e-05	0.00168679
Gm2464	0	0.433657	6.8108	12.3833	0.000433241	0.00689235
Gm26444	0	3.61678	2.98126	15.2742	9.29899e-05	0.00177892
Gm26516	0	-2.56013	3.56528	18.5766	1.63247e-05	0.00037322
Gm26538	0	-0.950384	4.60734	11.646	0.000643444	0.00962314
Gm26543	0	-0.939035	5.39187	20.5513	5.80682e-06	0.000146864
Gm26546	0	2.51678	3.04801	9.97911	0.00158336	0.0205563
Gm26578	0	-0.744815	5.4547	13.5851	0.00022801	0.00391983
Gm26603	0	3.0274	4.54218	99.5829	1.89095e-23	2.58044e-21
Gm26618	0	-0.338012	7.68521	11.7445	0.000610298	0.0092004
Gm26649	0	-2.02738	4.17242	29.2268	6.4411e-08	2.29695e-06
Gm26666	0	-4.41215	4.4862	97.6972	4.89937e-23	6.56901e-21
Gm26679	0	2.83801	2.83628	8.12572	0.00436436	0.0476371
Gm26699	0	0.849891	6.73944	43.1453	5.08731e-11	2.661e-09
Gm26700	0	-0.882884	5.92242	25.5218	4.3756e-07	1.36811e-05
Gm26711	0	1.8627	3.27235	9.39329	0.00217792	0.0270842
Gm26722	0	2.1197	4.96943	85.2383	2.65493e-20	3.08776e-18
Gm26723	0	-0.712402	7.04667	34.655	3.93889e-09	1.67506e-07
Gm26733	0	-1.77869	3.61372	12.0565	0.000516176	0.00801247
Gm26756	0	2.45754	3.33046	16.9804	3.7773e-05	0.000795461
Gm26789	0	-1.10169	5.87758	37.76	8.00661e-10	3.71352e-08
Gm26798	0	-2.65235	7.68801	473.142	7.44224e-105	6.17585e-102
Gm26814	0	2.11684	5.41841	106.327	6.28792e-25	9.32678e-23
Gm26821	0	-1.39936	3.73185	8.71856	0.00315002	0.036445
Gm26823	0	2.70129	3.98621	52.1552	5.13566e-13	3.34079e-11
Gm26837	0	3.32328	2.90946	12.0465	0.000518954	0.00803123
Gm26840	0	3.28829	3.02854	14.2817	0.000157404	0.00284961
Gm26876	0	-1.35961	4.98775	30.0009	4.32055e-08	1.59253e-06
Gm26912	0	3.39518	4.37122	99.9985	1.53303e-23	2.11077e-21
Gm26981	0	-1.54315	5.5434	53.8581	2.15838e-13	1.43755e-11
Gm27022	0	0.868413	5.38302	20.2383	6.83851e-06	0.000170707
Gm27803	0	-1.476	6.7815	110.544	7.49444e-26	1.18005e-23
Gm28294	0	-3.34164	4.60817	84.9219	3.11555e-20	3.58276e-18
Gm28424	0	1.95521	4.1691	36.0203	1.95411e-09	8.69552e-08
Gm28791	0	-0.965011	4.73366	13.6147	0.000224442	0.00387804
Gm28818	0	-1.83244	3.71252	14.1378	0.000169911	0.0030455
Gm28905	0	-1.42153	3.96596	13.3956	0.000252239	0.00429549
Gm28940	0	1.25176	4.15855	15.3282	9.03719e-05	0.00173532
Gm29322	0	2.03495	3.44511	14.332	0.000153259	0.00278113
Gm29609	0	1.34175	4.50382	25.2748	4.97331e-07	1.53777e-05
Gm29707	0	-3.82335	3.17175	16.3855	5.16867e-05	0.00105168
Gm30238	0	1.07962	4.3475	14.1774	0.000166378	0.00299266
Gm30648	0	3.0863	2.97958	11.4856	0.000701416	0.0103391
Gm32031	0	3.94303	3.00416	18.9499	1.34223e-05	0.000313159
Gm3294	0	-1.39158	4.51056	22.2663	2.37404e-06	6.39969e-05
Gm33533	0	1.95162	3.24689	8.80187	0.00300936	0.0352131
Gm35549	0	2.1728	3.25166	11.3563	0.000751976	0.0109633
Gm36940	0	-1.40529	3.69748	8.81137	0.00299374	0.0350896
Gm36989	0	-1.35237	5.37001	38.6861	4.98144e-10	2.35671e-08
Gm37005	0	2.97959	3.32543	21.9215	2.84114e-06	7.57902e-05
Gm37069	0	-4.52556	4.6385	111.199	5.38543e-26	8.6122e-24
Gm37077	0	1.15187	6.59372	72.4174	1.74654e-17	1.65512e-15
Gm37100	0	-2.03466	3.32508	9.09525	0.00256288	0.0308342
Gm37159	0	3.79179	5.23783	222.27	2.96735e-50	1.11109e-47
Gm37174	0	-4.80766	6.35385	377.615	4.42489e-84	3.08777e-81
Gm37186	0	1.15589	4.63481	20.7697	5.18076e-06	0.000132558
Gm37254	0	-1.42035	5.06672	33.9016	5.8006e-09	2.41003e-07
Gm37354	0	-0.628557	5.95481	13.5999	0.000226221	0.00390219
Gm37367	0	-0.801269	4.61438	8.63645	0.00329518	0.0379217
Gm37407	0	1.84587	3.54575	14.8012	0.000119473	0.00223386
Gm37422	0	1.33616	4.8346	31.973	1.5642e-08	6.13376e-07
Gm37482	0	2.5609	3.41605	21.0897	4.38397e-06	0.000113687
Gm37551	0	1.99343	5.09097	79.4909	4.86042e-19	5.18175e-17
Gm37566	0	2.81442	3.46219	23.6561	1.15218e-06	3.33111e-05
Gm37589	0	2.14188	4.72404	69.6261	7.18624e-17	6.45164e-15
Gm37602	0	-1.16909	4.99241	22.1629	2.5054e-06	6.71254e-05
Gm37633	0	-2.66898	3.86343	30.3111	3.68197e-08	1.36866e-06
Gm37672	0	-1.47941	3.94955	13.5871	0.000227775	0.00391799
Gm37707	0	2.86461	2.88491	8.44684	0.00365694	0.041084
Gm37728	0	-1.32652	5.58173	43.1617	5.04485e-11	2.64781e-09
Gm37749	0	-3.5135	3.04605	11.9695	0.000540841	0.0083238
Gm37751	0	1.95535	4.74025	58.3465	2.20186e-14	1.58699e-12
Gm37755	0	1.07846	4.59756	17.6306	2.68281e-05	0.000585036
Gm37773	0	-1.2455	6.44353	66.8361	2.95734e-16	2.55062e-14
Gm37781	0	1.15066	4.64317	20.0813	7.42342e-06	0.000183517
Gm37829	0	-2.46829	3.77386	23.0985	1.53954e-06	4.3169e-05
Gm37850	0	-1.21093	4.15462	12.1763	0.000484059	0.0075868
Gm37887	0	-3.45158	3.04334	11.0625	0.000880957	0.0125111
Gm37895	0	2.56168	4.98362	111.489	4.65307e-26	7.55915e-24
Gm37899	0	-0.800492	6.6159	32.6868	1.08334e-08	4.36521e-07
Gm37914	0	0.944894	4.19078	9.25154	0.0023531	0.0288421
Gm37973	0	-3.71254	3.45584	25.0407	5.61518e-07	1.72064e-05
Gm38037	0	3.97019	3.71753	57.6968	3.06339e-14	2.17727e-12
Gm38056	0	-1.77921	5.02792	48.4082	3.46548e-12	2.07821e-10
Gm38190	0	1.65648	3.7183	15.4368	8.53233e-05	0.00165181
Gm38200	0	0.697686	5.13527	11.1772	0.00082813	0.0118873
Gm38217	0	-2.26867	3.6914	17.8608	2.37707e-05	0.00052357
Gm38227	0	-2.54087	3.30594	11.6054	0.00065765	0.00980694
Gm38231	0	-3.08981	3.3592	18.3273	1.86053e-05	0.000420971
Gm38257	0	-1.07087	4.25936	10.486	0.00120287	0.0163036
Gm38260	0	0.711969	5.17408	11.5871	0.000664157	0.00987998
Gm38286	0	1.89933	6.55793	183.5	8.4885e-42	2.28624e-39
Gm40309	0	1.42157	4.01368	17.0396	3.66135e-05	0.000772102
Gm42303	0	-1.04014	4.22089	10.0323	0.00153831	0.0200306
Gm42372	0	-3.23094	4.32611	64.8502	8.09941e-16	6.56159e-14
Gm42463	0	1.44487	5.78885	69.9996	5.94691e-17	5.37041e-15
Gm42479	0	1.6089	3.56944	11.3746	0.000744617	0.0108818
Gm42482	0	1.01823	4.68705	16.8425	4.06191e-05	0.000847261
Gm42490	0	1.54498	4.02374	20.2217	6.89812e-06	0.000172055
Gm42508	0	-2.58937	4.70892	64.9957	7.52264e-16	6.15933e-14
Gm42548	0	2.30928	3.49138	17.6635	2.6368e-05	0.00057582
Gm42576	0	1.12986	4.71968	21.1538	4.23968e-06	0.000110292
Gm42583	0	1.02799	5.18032	24.3132	8.19037e-07	2.4439e-05
Gm42585	0	0.761161	6.44692	29.9634	4.40493e-08	1.62169e-06
Gm42588	0	1.17164	4.07356	12.2419	0.000467323	0.00736207
Gm42589	0	-2.25363	3.28478	9.7526	0.0017908	0.0228817
Gm42609	0	0.638016	5.50737	11.5975	0.00066046	0.00984406
Gm42635	0	-0.646547	6.3458	18.391	1.79939e-05	0.000408341
Gm42639	0	-1.29683	6.68953	79.5613	4.69029e-19	5.01779e-17
Gm42648	0	1.54681	4.51786	32.7617	1.04236e-08	4.21115e-07
Gm42727	0	-1.30984	3.78993	9.13001	0.00251463	0.0303734
Gm42822	0	-2.32186	3.85306	23.9663	9.8068e-07	2.87866e-05
Gm42843	0	2.4242	5.4071	132.498	1.17489e-30	2.17313e-28
Gm42872	0	2.18132	3.13278	8.50721	0.00353758	0.0401095
Gm42873	0	-2.50174	3.56665	17.9501	2.2682e-05	0.000502472
Gm42889	0	5.34667	3.63787	72.2054	1.94453e-17	1.82027e-15
Gm42972	0	-1.10698	4.50889	14.4132	0.000146784	0.00268106
Gm42986	0	-1.57737	3.68848	11.121	0.000853618	0.0122018
Gm42992	0	0.607625	5.52192	10.5052	0.00119049	0.016181
Gm43059	0	3.46461	3.9927	72.2585	1.89288e-17	1.78279e-15
Gm43071	0	-0.716819	4.97872	9.36132	0.00221624	0.027505
Gm43080	0	2.96368	3.48047	27.9438	1.24942e-07	4.3152e-06
Gm43113	0	-1.70425	3.71019	12.426	0.00042343	0.00675376
Gm43118	0	2.00461	6.65153	219.657	1.10155e-49	4.07495e-47
Gm43140	0	-1.82711	3.39472	8.57111	0.00341555	0.0390582
Gm43174	0	-0.659757	5.25138	9.76522	0.00177855	0.0227536
Gm43181	0	-4.65818	3.48972	33.512	7.08694e-09	2.90361e-07
Gm43182	0	2.35036	3.36367	16.3884	5.16082e-05	0.00105078
Gm43187	0	-2.05928	4.11051	27.1119	1.92093e-07	6.4109e-06
Gm43188	0	2.24425	6.14362	187.032	1.43914e-42	3.99657e-40
Gm43200	0	-1.96975	4.18894	30.0978	4.10991e-08	1.51671e-06
Gm43201	0	-1.33498	4.58256	21.5387	3.46846e-06	9.16484e-05
Gm43320	0	2.04725	6.29909	151.258	9.31539e-35	2.01422e-32
Gm43341	0	1.35656	4.52078	25.1578	5.28431e-07	1.62412e-05
Gm43379	0	0.538689	5.61022	9.09036	0.00256973	0.0308811
Gm43466	0	-1.44049	3.63096	8.53334	0.00348715	0.0397142
Gm43485	0	4.79473	5.93122	459.079	8.49378e-102	6.687e-99
Gm43511	0	0.880966	4.86808	14.5776	0.000134522	0.00248219
Gm43514	0	1.52932	3.8718	16.4471	5.00338e-05	0.00102211
Gm43557	0	-2.01854	3.35613	9.10418	0.00255039	0.0307087
Gm43593	0	-2.70836	3.62805	22.5731	2.02355e-06	5.51787e-05
Gm43597	0	-3.27829	3.56857	25.7847	3.81834e-07	1.2074e-05
Gm43606	0	-1.00426	4.68255	14.1049	0.00017291	0.00309204
Gm43657	0	3.29697	3.1306	16.1471	5.86169e-05	0.00117709
Gm43667	0	-1.09718	4.08155	9.57385	0.0019738	0.0249295
Gm43668	0	-5.13433	5.32152	204.613	2.10196e-46	7.25152e-44
Gm43684	0	3.29611	4.20625	83.7069	5.75932e-20	6.4538e-18
Gm43715	0	1.50068	4.60644	33.552	6.94248e-09	2.85357e-07
Gm43751	0	-0.71226	5.19888	10.839	0.0009939	0.0138586
Gm43766	0	-1.40681	6.08724	65.4968	5.83393e-16	4.84122e-14
Gm43789	0	1.72105	3.30621	8.34708	0.00386324	0.0431334
Gm43800	0	1.85282	3.26966	8.46321	0.00362418	0.0408505
Gm43810	0	-4.17927	3.34034	23.2151	1.449e-06	4.09292e-05
Gm43829	0	1.46394	4.36178	25.848	3.69531e-07	1.17091e-05
Gm43843	0	-1.80795	3.91666	18.3153	1.87236e-05	0.000422714
Gm43876	0	-1.68187	3.88059	15.6693	7.54482e-05	0.00147646
Gm43879	0	-0.643425	5.64417	11.7932	0.000594532	0.00899631
Gm43888	0	3.74102	5.06067	190.1	3.08039e-43	9.00765e-41
Gm43915	0	-1.87993	3.59208	11.9654	0.000542036	0.00833384
Gm43920	0	-1.29544	5.28046	33.9708	5.59806e-09	2.3322e-07
Gm43980	0	1.68602	3.42916	9.80605	0.00173949	0.0222911
Gm44090	0	-1.11253	4.34199	12.5297	0.000400564	0.00644259
Gm44187	0	-2.2614	3.22791	9.09457	0.00256383	0.0308342
Gm44240	0	1.00552	5.71092	32.5709	1.14989e-08	4.60184e-07
Gm44242	0	-0.892266	4.92312	13.5836	0.000228197	0.00392086
Gm44283	0	-1.04357	5.06352	19.735	8.89779e-06	0.00021648
Gm4430	0	0.96244	4.09184	8.87227	0.0028955	0.0341805
Gm44432	0	-2.517	4.15777	39.7667	2.8643e-10	1.38934e-08
Gm44433	0	-1.0146	4.47309	12.0499	0.000518004	0.00802349
Gm44435	0	2.84807	8.06131	837.635	5.07142e-184	1.03809e-180
Gm44438	0	-0.568463	5.71547	9.72345	0.00181942	0.0232377
Gm44518	0	1.93708	3.30992	10.2092	0.00139751	0.0184715
Gm44552	0	-1.88277	4.88326	48.2987	3.6645e-12	2.18475e-10
Gm44560	0	-1.0594	6.20803	42.5553	6.87779e-11	3.54917e-09
Gm44586	0	1.43655	5.37215	51.8207	6.08935e-13	3.91145e-11
Gm44587	0	-1.18909	6.06947	48.1048	4.04525e-12	2.39779e-10
Gm44601	0	1.02637	3.93181	8.17524	0.00424679	0.0465691
Gm44607	0	2.33528	3.62706	25.1328	5.35327e-07	1.64367e-05
Gm44624	0	2.19477	3.21445	11.3081	0.000771737	0.0111982
Gm44681	0	-2.22721	3.84356	22.2036	2.4528e-06	6.59465e-05
Gm44700	0	0.69511	5.91398	18.4144	1.77744e-05	0.000403956
Gm44704	0	-1.63327	3.85666	13.2824	0.00026794	0.00453019
Gm44712	0	-0.850863	4.76722	11.2324	0.000803894	0.0115936
Gm44729	0	-1.80741	3.64348	12.9503	0.000319897	0.00529208
Gm44797	0	2.08617	5.45325	107.868	2.88996e-25	4.32845e-23
Gm44800	0	-0.640148	5.84621	13.1683	0.000284752	0.00478808
Gm44829	0	-4.49829	7.85729	939.332	4.33345e-206	1.02349e-202
Gm44863	0	-1.31778	5.05447	29.849	4.67263e-08	1.71613e-06
Gm44891	0	-2.15504	3.24678	8.46214	0.00362631	0.0408595
Gm44897	0	-4.58331	3.52049	32.466	1.21366e-08	4.84581e-07
Gm44957	0	2.80389	3.44169	22.2537	2.38967e-06	6.43619e-05
Gm45025	0	1.53953	3.52375	9.66995	0.00187317	0.0238153
Gm45041	0	2.47423	4.53628	77.5133	1.32246e-18	1.35349e-16
Gm45112	0	-3.56138	3.38992	21.0665	4.43722e-06	0.000114681
Gm45133	0	1.41419	4.41316	26.1556	3.15107e-07	1.00887e-05
Gm45151	0	1.79304	4.15418	30.9181	2.69283e-08	1.01324e-06
Gm45187	0	-2.78209	3.35636	14.4246	0.000145905	0.00266817
Gm45204	0	1.08826	4.90844	22.6616	1.93242e-06	5.29793e-05
Gm45222	0	-1.44072	4.05021	14.6685	0.00012819	0.00237677
Gm45250	0	-1.84628	3.8972	18.0187	2.18791e-05	0.000486666
Gm45251	0	2.45861	2.98054	8.07154	0.00449678	0.0487705
Gm45258	0	1.70504	3.75781	17.1244	3.50162e-05	0.000742807
Gm45262	0	1.36915	4.0351	16.263	5.51372e-05	0.00111231
Gm45263	0	0.998764	6.08241	41.0996	1.44796e-10	7.22896e-09
Gm45264	0	1.46498	4.08891	19.4379	1.03947e-05	0.00024876
Gm45265	0	0.653338	5.1809	9.80314	0.00174225	0.0223139
Gm45345	0	-2.33958	3.18896	8.29712	0.00397098	0.0441118
Gm45394	0	2.86499	3.26975	18.8008	1.45133e-05	0.000335807
Gm45464	0	-2.94292	4.0373	40.1758	2.32303e-10	1.14122e-08
Gm45629	0	-3.01643	3.21294	12.9607	0.000318121	0.00527124
Gm45644	0	-3.50272	3.60481	28.8305	7.90333e-08	2.79567e-06
Gm45645	0	2.20873	4.71582	75.7239	3.27218e-18	3.3049e-16
Gm45714	0	3.58556	2.93486	14.3845	0.000149038	0.00271737
Gm45733	0	6.44264	4.27904	171.154	4.20428e-39	1.0495e-36
Gm45765	0	-3.46584	3.04519	11.5935	0.000661896	0.00985917
Gm45838	0	1.5707	3.42989	8.81107	0.00299423	0.0350896
Gm45846	0	-0.481275	6.00049	8.57893	0.0034009	0.0389777
Gm45854	0	-2.68153	5.20372	101.117	8.71777e-24	1.23079e-21
Gm45890	0	5.12949	4.51673	185.367	3.32171e-42	9.02565e-40
Gm45902	0	-0.723247	4.87589	8.76382	0.0030728	0.0357918
Gm45906	0	-0.627641	7.04264	27.3212	1.7238e-07	5.82261e-06
Gm4610	0	-3.24344	2.9321	8.85625	0.00292102	0.0344155
Gm4673	0	0.862823	5.72036	24.2696	8.37769e-07	2.49737e-05
Gm4793	0	0.861497	4.61439	11.5064	0.000693632	0.0102475
Gm4924	0	1.8619	4.47049	46.5378	8.99711e-12	5.06875e-10
Gm5475	0	-3.09643	3.13072	11.854	0.000575426	0.00875081
Gm973	0	1.82297	3.94655	25.4125	4.63061e-07	1.44051e-05
Gm9821	0	-2.11552	3.93907	24.8152	6.31203e-07	1.91696e-05
Gm9866	0	-0.818921	5.1275	13.137	0.000289544	0.00486066
Gm9911	0	1.31907	4.71273	27.9483	1.24652e-07	4.31004e-06
Gm9929	0	3.59154	3.15183	20.3562	6.4299e-06	0.000161294
Gm9958	0	-1.86659	3.45882	10.057	0.0015178	0.0198055
Gm996	0	-0.682859	5.33162	11.0667	0.000878971	0.0124944
Gm9972	0	-3.15624	2.93436	8.4932	0.00356493	0.0403487
Gm9989	0	1.17617	3.86403	10.0058	0.00156059	0.020295
Gmcl1	0	0.558564	6.23046	14.2231	0.000162383	0.00293282
Gnai3	0	0.955481	5.10292	20.2832	6.67982e-06	0.000166881
Gnaz	0	1.24247	5.68344	50.3879	1.2634e-12	7.8525e-11
Gnb1	0	-0.244023	8.51803	9.7211	0.00182175	0.0232578
Gnb4	0	-1.56549	3.98209	14.9581	0.000109937	0.00207214
Gng4	0	1.36291	4.98967	37.961	7.22302e-10	3.36024e-08
Gnmt	0	1.71523	3.71894	16.5118	4.83562e-05	0.000993794
Gnrh1	0	-1.7896	5.235	53.3047	2.86047e-13	1.88472e-11
Golga2	0	-0.662994	5.86497	14.495	0.000140548	0.00258251
Gorasp2	0	0.468745	5.96617	8.57376	0.00341059	0.039045
Gosr1	0	0.904866	5.15279	18.9797	1.32144e-05	0.000308779
Got1	0	0.260256	8.25569	10.0747	0.00150328	0.0196747
Gp1ba	0	-2.6281	3.30527	12.5081	0.000405231	0.00650937
Gpank1	0	-1.67305	5.79718	74.1236	7.35875e-18	7.19564e-16
Gpat2	0	-1.90089	3.53993	11.739	0.000612101	0.00921725
Gpbp1	0	0.967198	6.70123	56.5565	5.46985e-14	3.83439e-12
Gpbp1l1	0	0.476186	6.47744	12.1337	0.00049523	0.00773032
Gpc1	0	0.699664	5.7404	16.5316	4.78533e-05	0.000984778
Gpcpd1	0	0.467277	7.06974	16.73	4.31021e-05	0.00089601
Gpd2	0	-0.583489	5.64419	9.87015	0.00167992	0.0216997
Gpkow	0	-0.858437	5.59707	20.2009	6.9737e-06	0.000173658
Gpld1	0	2.2241	3.6524	23.0941	1.54307e-06	4.32286e-05
Gpr107	0	-0.53487	5.94755	9.96879	0.00159225	0.0206484
Gpr26	0	0.715291	5.17781	11.9758	0.000539017	0.00829989
Gpr45	0	3.90141	7.0012	711.878	1.01174e-156	1.63498e-153
Gpr82	0	-6.05658	5.40595	243.303	7.72183e-55	3.24782e-52
Gpr83	0	1.593	4.7171	41.8081	1.0078e-10	5.09775e-09
Gpr89	0	-0.381152	6.68949	8.35957	0.00383678	0.0428848
Gprasp2	0	0.909255	8.57205	140.443	2.15205e-32	4.31874e-30
Gpsm1	0	-0.704122	6.04404	18.3032	1.8843e-05	0.000424659
Gpx1	0	-0.865469	7.34198	59.8469	1.02722e-14	7.59996e-13
Grb10	0	1.05398	5.83324	39.7685	2.86166e-10	1.38934e-08
Greb1l	0	-1.11467	4.05281	9.47806	0.00207955	0.0260827
Grhl1	0	1.33262	4.88588	33.5279	7.02928e-09	2.88539e-07
Grhpr	0	0.669513	5.34066	11.8893	0.000564612	0.0086248
Grid2	0	-1.01828	8.83366	180.853	3.20925e-41	8.49456e-39
Grid2ip	0	-1.66562	3.62584	10.6329	0.00111103	0.0152359
Grin1	0	-0.520402	8.01413	33.2007	8.31712e-09	3.38237e-07
Gripap1	0	1.59186	8.07144	324.369	1.70881e-72	9.36916e-70
Grtp1	0	1.02631	4.11588	10.2488	0.00136782	0.0181571
Gsk3b	0	0.277408	8.18063	10.7429	0.00104689	0.0144791
Gsn	0	-0.364831	7.00606	9.10826	0.00254471	0.0306523
Gsta4	0	-1.81774	3.84129	16.0041	6.32143e-05	0.00126116
Gstk1	0	-0.606288	5.48119	9.62212	0.00192259	0.0243528
Gstm1	0	1.45429	5.11619	47.25	6.25599e-12	3.60383e-10
Gstm3	0	-5.04944	4.75794	129.844	4.47151e-30	8.07608e-28
Gstm4	0	2.31906	5.25779	118.058	1.69609e-27	2.87716e-25
Gstp1	0	-0.33133	9.04809	23.0008	1.61981e-06	4.51723e-05
Gtf2a2	0	-0.900544	8.01685	91.3931	1.183e-21	1.50095e-19
Gtf2h1	0	0.737534	5.38715	14.7092	0.000125451	0.00233446
Gtf2h2	0	0.6492	5.70532	13.8896	0.000193887	0.00342466
Gtf2h4	0	-0.854172	5.82783	23.208	1.45438e-06	4.10435e-05
Gtf2h5	0	0.327132	7.71525	11.8701	0.000570485	0.00868427
Gtf3c3	0	-0.858862	5.79426	22.5643	2.03279e-06	5.53813e-05
Gtf3c4	0	-1.29065	5.00665	28.2124	1.08754e-07	3.79022e-06
Gtf3c6	0	-1.59117	5.61863	60.1292	8.90007e-15	6.63271e-13
Gtpbp8	0	1.65758	6.08591	109.057	1.58664e-25	2.39982e-23
Gucd1	0	-3.14485	3.24924	14.652	0.000129313	0.00239472
Gucy1a2	0	-0.796293	6.59108	32.2253	1.37367e-08	5.43518e-07
Guf1	0	-0.495817	5.8505	8.2456	0.00408526	0.0450876
Gulp1	0	1.31039	3.98838	14.0479	0.000178231	0.00317609
Gusb	0	1.70433	5.87112	101.112	8.73871e-24	1.23079e-21
H2-DMa	0	-2.70998	3.56973	19.4316	1.04288e-05	0.000249382
H2-T23	0	3.91055	3.80085	65.6863	5.29909e-16	4.43333e-14
H2-T24	0	4.20679	5.82228	388.109	2.30703e-86	1.68655e-83
H3f3a	0	-1.91072	7.68933	296.415	2.08123e-66	9.83108e-64
H3f3aos	0	3.32859	5.28097	204.485	2.24071e-46	7.6443e-44
H6pd	0	-1.16281	3.89545	8.57701	0.00340449	0.0389897
Haghl	0	0.475603	7.21687	18.9295	1.35667e-05	0.000316048
Hap1	0	-0.510651	9.70354	70.9989	3.58366e-17	3.30428e-15
Harbi1	0	-2.47169	3.58459	18.1056	2.09027e-05	0.000465744
Hat1	0	-1.13185	5.7209	35.937	2.03947e-09	9.04913e-08
Haus1	0	-1.48292	6.10865	73.579	9.69608e-18	9.42115e-16
Haus8	0	-2.01035	3.79619	18.394	1.7966e-05	0.00040801
Hbs1l	0	-0.521798	6.43047	13.0975	0.000295722	0.00494815
Hdac1	0	0.466487	6.86501	14.6867	0.000126952	0.00235809
Hdac3	0	-0.434079	6.50732	9.69833	0.00184446	0.0234989
Hdac8	0	1.15189	4.98176	27.427	1.63201e-07	5.53083e-06
Hddc2	0	0.602005	5.37186	9.82257	0.00172393	0.0221286
Hdhd2	0	-1.22124	6.70108	75.6425	3.40987e-18	3.43268e-16
Hdlbp	0	-0.276869	7.73026	8.12337	0.00437002	0.047665
Heatr1	0	-0.973155	4.30306	9.83296	0.00171422	0.0220408
Herc1	0	0.336701	8.05176	14.8464	0.000116647	0.00219055
Herc2	0	0.368787	6.76802	8.55528	0.00344538	0.0392968
Herpud2	0	-0.413747	6.58534	9.17965	0.00244733	0.0297221
Hes2	0	-2.97635	3.17063	11.7066	0.000622851	0.00936076
Hexa	0	1.37821	5.87545	69.1926	8.95288e-17	8.01426e-15
Hexb	0	0.440045	6.52764	10.705	0.00106853	0.014732
Hgs	0	0.628226	5.99527	15.7166	7.35879e-05	0.00144281
Hhipl1	0	-2.91026	3.14842	10.8231	0.0010025	0.0139532
Hif1a	0	-0.715149	6.55301	25.6697	4.05293e-07	1.27501e-05
Hint1	0	-0.516131	9.62984	71.2257	3.19451e-17	2.96327e-15
Hip1r	0	0.543244	6.05244	12.0824	0.000509037	0.0079257
Hipk1	0	-0.647376	6.07958	15.8826	6.74038e-05	0.00133434
Hist1h2ak	0	3.48235	2.97969	14.1938	0.00016493	0.00297184
Hist1h2bc	0	0.924499	4.82626	15.8091	7.00743e-05	0.00138453
Hist1h3h	0	2.96127	2.8361	8.87638	0.00288898	0.0341166
Hist2h2ac	0	-2.28137	3.37415	10.7622	0.00103601	0.014348
Hist2h3b	0	-1.49169	3.73957	10.2276	0.00138364	0.0183343
Hltf	0	-0.642423	7.03704	28.2912	1.04412e-07	3.64718e-06
Hmces	0	-0.509593	6.10994	10.1993	0.00140506	0.0185553
Hmgb2	0	0.631279	5.14331	9.14809	0.00248991	0.0301341
Hmgb3	0	0.650865	6.56858	23.9927	9.67299e-07	2.8421e-05
Hmgcr	0	0.347105	7.85011	14.1546	0.000168405	0.00302205
Hmgn3	0	-0.257128	8.87531	12.834	0.000340402	0.00559213
Hnrnpa0	0	-8.03446	6.86955	650.301	2.3839e-143	3.0498e-140
Hnrnpa1	0	0.435987	7.97986	24.4994	7.43557e-07	2.22516e-05
Hnrnpab	0	0.383983	6.76307	9.42069	0.00214562	0.0267484
Hnrnph1	0	0.601409	8.53206	61.4862	4.46746e-15	3.4037e-13
Hnrnpl	0	-0.296944	7.48403	8.21449	0.00415589	0.0456866
Hnrnpu	0	-0.4643	8.0567	27.2727	1.76761e-07	5.95097e-06
Hnrnpul1	0	-0.535346	5.89395	9.71859	0.00182424	0.0232799
Homez	0	1.8672	4.71228	54.4011	1.6373e-13	1.10487e-11
Hpcal1	0	-0.489923	7.07595	17.2486	3.27992e-05	0.000702277
Hpd	0	6.64897	4.49064	199.837	2.3136e-45	7.32336e-43
Hprt	0	0.471261	7.14369	17.8988	2.33004e-05	0.000514318
Hps5	0	0.926112	4.38602	10.986	0.000918089	0.0129724
Hrasls	0	-0.549563	5.77209	9.66148	0.00188183	0.0239152
Hrk	0	2.75893	3.83959	43.6274	3.97639e-11	2.11964e-09
Hs6st2	0	0.406447	6.62063	9.65124	0.00189235	0.0240094
Hscb	0	-0.557335	5.97796	11.1965	0.000819565	0.0117864
Hsd17b12	0	0.933052	7.64801	92.8194	5.7548e-22	7.36231e-20
Hsd17b14	0	-4.28087	4.18614	70.9302	3.7107e-17	3.4098e-15
Hsd17b7	0	1.81076	4.60422	47.1692	6.5191e-12	3.74136e-10
Hsdl2	0	0.741267	4.86221	10.3734	0.00127849	0.0171644
Hspa12a	0	-0.75413	5.89172	18.9898	1.31446e-05	0.00030738
Hspa1a	0	-2.20091	3.39384	11.3946	0.000736626	0.0107804
Hspa8	0	-4.84982	10.0445	3327.75	0	0
Hspa9	0	1.28004	6.16717	70.5605	4.47536e-17	4.06543e-15
Hspd1	0	-1.65158	7.01903	153.864	2.51099e-35	5.54659e-33
Hsph1	0	-0.828421	6.16202	26.4428	2.71563e-07	8.79937e-06
Htr4	0	1.94489	4.34719	42.8803	5.82509e-11	3.02629e-09
Htr5a	0	1.27651	4.68813	26.3376	2.86767e-07	9.25009e-06
Htra2	0	-4.35959	6.87939	486.077	1.14757e-107	9.78751e-105
Hyal6	0	-3.10946	3.19019	13.1305	0.000290555	0.00487231
Ica1l	0	-0.870068	6.05717	27.2341	1.80323e-07	6.05096e-06
Icam5	0	0.724321	5.57371	16.2655	5.50668e-05	0.00111162
Ice1	0	-0.641547	8.13034	52.6872	3.91696e-13	2.56979e-11
Ice2	0	0.379627	6.6836	8.74543	0.00310394	0.0360725
Ifi27	0	-0.572098	5.53932	8.83104	0.00296164	0.034814
Ifi30	0	-5.4587	4.08193	72.2067	1.94326e-17	1.82027e-15
Ifrd1	0	-0.461209	6.10108	8.32038	0.00392044	0.0436926
Ift172	0	0.757006	5.03318	12.1868	0.000481332	0.00754792
Ift20	0	-0.608682	7.39787	31.8522	1.6645e-08	6.4774e-07
Ift27	0	0.669075	6.21971	20.6581	5.49161e-06	0.000139466
Ift43	0	-0.502565	6.3713	11.7749	0.000600407	0.00906783
Ift81	0	0.642241	6.30339	19.5229	9.94195e-06	0.000239055
Igbp1	0	-0.352276	7.15733	9.56581	0.00198246	0.025008
Igdcc4	0	-0.751859	6.96243	36.6359	1.42488e-09	6.4243e-08
Igf2bp3	0	1.34401	5.62437	55.2212	1.07875e-13	7.37682e-12
Igfbp5	0	-0.803345	6.90355	39.8927	2.68528e-10	1.31079e-08
Ikbkap	0	0.864206	7.11165	57.7408	2.99557e-14	2.13401e-12
Ikzf2	0	-0.843194	5.24677	15.1946	9.69928e-05	0.00184515
Il17rc	0	-1.8646	3.58622	12.4558	0.000416734	0.0066608
Il1rl1	0	3.5545	3.02422	14.9629	0.000109659	0.00206943
Il6st	0	-0.785692	4.68959	9.07243	0.00259505	0.0311366
Ildr2	0	1.98051	5.22619	88.3894	5.39775e-21	6.57669e-19
Ilf2	0	0.344712	8.12698	16.4179	5.08097e-05	0.0010359
Ilf3	0	3.01396	5.48345	196.022	1.57239e-44	4.82785e-42
Ilvbl	0	0.731143	5.2012	12.709	0.000363935	0.00591231
Immt	0	-0.462025	7.30656	17.3482	3.1124e-05	0.000672034
Imp4	0	1.3747	5.81896	66.3033	3.875e-16	3.27763e-14
Impad1	0	-0.990855	7.32447	76.1631	2.61969e-18	2.67226e-16
Ina	0	0.404541	8.05419	21.5885	3.37951e-06	8.93751e-05
Ing1	0	-0.477819	6.02949	8.51107	0.00353008	0.0400659
Ing2	0	0.549713	6.22691	13.8116	0.00020211	0.00354808
Inha	0	2.10988	6.44944	215.903	7.25407e-49	2.58987e-46
Ino80d	0	-0.480561	6.9672	15.4065	8.67005e-05	0.00167425
Inpp4a	0	-0.700585	7.19519	36.8918	1.24959e-09	5.69247e-08
Inpp5e	0	-0.945534	4.76197	13.3917	0.000252761	0.00430198
Inpp5f	0	2.91921	8.19837	963.525	2.44365e-211	6.8209e-208
Insig1	0	1.36181	6.13506	79.2489	5.49375e-19	5.81655e-17
Insm2	0	-6.71282	7.87799	1205.93	6.56296e-264	2.8787e-260
Ints2	0	0.584817	5.97254	13.3552	0.000257733	0.00437206
Ints6	0	-1.32621	6.06076	57.8255	2.86935e-14	2.04885e-12
Intu	0	0.715457	5.74475	17.0927	3.56055e-05	0.000752395
Ip6k1	0	-0.652415	5.32742	9.92673	0.00162906	0.0210693
Ipmk	0	-0.68105	4.96176	8.49306	0.00356521	0.0403487
Iqca	0	1.9948	3.71565	21.3611	3.80516e-06	9.96873e-05
Iqcb1	0	-0.512115	6.51856	13.3568	0.000257518	0.00437083
Iqce	0	-0.703825	7.14705	35.7083	2.29348e-09	1.01032e-07
Iqcf4	0	-2.16131	3.24654	8.27659	0.00401613	0.0444364
Iqgap1	0	-0.982471	5.66753	26.7674	2.2957e-07	7.56299e-06
Iqub	0	-1.76016	3.55691	10.8671	0.000978962	0.0136876
Irak1	0	-0.887655	5.49186	20.043	7.57378e-06	0.000186783
Irak3	0	2.93588	2.83692	8.66017	0.00325257	0.0375016
Isca2	0	-0.313251	7.35405	8.50727	0.00353746	0.0401095
Isoc1	0	-4.27161	5.25223	164.704	1.07658e-37	2.66576e-35
Isoc2b	0	1.34099	5.14807	40.9236	1.58442e-10	7.89739e-09
Ist1	0	0.467424	7.21394	18.2329	1.95508e-05	0.000438486
Itfg1	0	-0.243852	8.24058	8.45795	0.00363467	0.0409388
Itga10	0	3.02932	2.81235	8.93007	0.00280527	0.0332675
Itgb7	0	1.22601	3.80303	10.0461	0.00152677	0.0198973
Itih2	0	1.32178	4.43539	23.3297	1.36519e-06	3.89201e-05
Itsn2	0	0.823457	6.09222	28.3705	1.00225e-07	3.5089e-06
Ivns1abp	0	-0.786779	6.36133	27.1925	1.84246e-07	6.17586e-06
Izumo4	0	-0.556038	8.28517	43.95	3.37212e-11	1.81327e-09
Jagn1	0	5.93088	5.32753	371.129	1.13992e-82	7.44681e-80
Jak2	0	-0.722047	5.5871	14.3736	0.000149911	0.00273004
Jam3	0	0.615193	5.58204	11.702	0.000624371	0.009379
Jmjd6	0	-0.577393	7.396	28.5966	8.9177e-08	3.14001e-06
Josd1	0	-0.466018	6.31909	9.65767	0.00188573	0.0239452
Jph4	0	-0.881548	6.51077	36.9208	1.23115e-09	5.6168e-08
Junb	0	-0.514719	6.76597	15.6529	7.6106e-05	0.00148743
K230010J24Rik	0	1.91268	3.35866	10.7808	0.00102566	0.0142304
Kansl2	0	-0.476104	6.33867	10.336	0.0013047	0.0174475
Kat14	0	0.878256	4.76127	13.4477	0.000245338	0.00418492
Kcnb1	0	-0.693008	5.45723	12.1262	0.000497225	0.00775752
Kcnc1	0	-0.39789	7.82049	17.4608	2.93338e-05	0.000635686
Kcnc2	0	-0.410687	7.21792	13.2415	0.000273843	0.00461943
Kcnc4	0	-0.838549	4.84366	11.3435	0.000757167	0.0110285
Kcnh6	0	1.53281	4.83057	42.376	7.5379e-11	3.8703e-09
Kcnj3	0	0.878773	5.50915	22.5794	2.01694e-06	5.50489e-05
Kcnj6	0	0.5219	5.94368	10.3403	0.00130168	0.0174224
Kcnj9	0	0.573024	6.02924	13.324	0.000262059	0.00444054
Kcnk6	0	2.86279	2.83789	8.26196	0.00404862	0.0447476
Kcnq1ot1	0	0.382521	9.39832	35.561	2.47354e-09	1.08187e-07
Kcnt1	0	-0.510625	7.1068	19.1372	1.21677e-05	0.0002865
Kcp	0	-1.12617	3.97677	8.64103	0.00328691	0.0378408
Kctd18	0	-0.857092	4.58205	10.0094	0.00155754	0.0202638
Kdm4a	0	0.631123	5.74869	13.6473	0.000220579	0.00382853
Kdm6a	0	0.528834	6.22669	12.7431	0.000357366	0.00582408
Kdsr	0	-0.730016	6.33188	23.1712	1.48247e-06	4.1683e-05
Keap1	0	-0.620558	7.24291	30.1048	4.09511e-08	1.51307e-06
Khdrbs3	0	-0.483889	6.57616	12.3411	0.000443138	0.00703158
Khk	0	0.850442	4.99339	14.9582	0.000109933	0.00207214
Kif15	0	3.32509	3.09124	15.8216	6.96148e-05	0.00137634
Kif17	0	-2.65581	3.11177	8.73329	0.00312467	0.0362284
Kif1a	0	-0.932537	8.86868	155.979	8.66567e-36	1.9564e-33
Kif20b	0	4.0566	3.27296	31.8788	1.64188e-08	6.39751e-07
Kif21a	0	0.225362	9.09931	11.0909	0.000867583	0.0123554
Kif27	0	0.999508	4.07394	9.43265	0.00213167	0.0266277
Kif3c	0	1.82427	4.68884	51.7203	6.40886e-13	4.09954e-11
Kif6	0	1.74058	4.23901	32.5689	1.15106e-08	4.60184e-07
Kif9	0	-1.48437	4.21912	18.7158	1.51746e-05	0.000348744
Kifap3	0	-1.58906	8.33062	315.734	1.29525e-70	6.62822e-68
Kiss1r	0	-0.64051	6.91941	26.469	2.67898e-07	8.70428e-06
Klc3	0	2.78427	3.17386	14.6525	0.00012928	0.00239472
Klf16	0	3.37263	3.36279	28.1411	1.12835e-07	3.91909e-06
Klhdc1	0	-0.375864	6.89144	9.09066	0.00256932	0.0308811
Klhl20	0	0.483839	5.87158	8.60155	0.00335893	0.0385398
Klhl24	0	-0.607627	6.47926	18.1536	2.03817e-05	0.000455128
Klhl3	0	0.74897	5.28653	14.1449	0.000169279	0.00303595
Klhl35	0	-2.45389	3.75296	22.1258	2.5543e-06	6.8376e-05
Klhl6	0	3.08736	2.95759	10.8475	0.000989381	0.0138019
Klk10	0	2.79017	3.13316	13.9579	0.000186968	0.0033183
Kmt2d	0	0.514683	6.63097	15.6756	7.51982e-05	0.0014725
Kmt2e	0	-0.243267	8.95736	11.8528	0.000575784	0.00875192
Kng2	0	0.781193	4.75289	10.5686	0.00115031	0.0156834
Kpna1	0	-0.59815	7.66261	35.4364	2.63699e-09	1.14846e-07
Kpna2	0	-1.39041	4.14714	15.3946	8.72478e-05	0.0016827
Kpna3	0	0.839924	5.93231	26.6754	2.40759e-07	7.90617e-06
Kpna6	0	-2.47161	4.93826	72.7184	1.4995e-17	1.42983e-15
Kri1	0	-0.619936	5.63619	11.1749	0.000829168	0.0118966
Ktn1	0	0.824149	9.29961	159.693	1.33819e-36	3.13648e-34
L3mbtl1	0	1.24183	4.47634	21.1844	4.17258e-06	0.000108664
Lactb2	0	0.719614	5.45678	14.7023	0.000125907	0.00234152
Lage3	0	0.477175	5.97039	8.98889	0.00271639	0.0323021
Lama5	0	1.01742	4.2912	11.9764	0.000538832	0.00829989
Lamtor5	0	-0.722846	6.09822	19.9196	8.0788e-06	0.000198124
Larp4	0	-1.0507	7.34577	84.5685	3.72514e-20	4.23617e-18
Las1l	0	-0.65062	6.2423	17.8889	2.34229e-05	0.00051665
Lasp1	0	0.73934	5.46067	15.5301	8.12138e-05	0.00157622
Lbh	0	1.08224	5.61707	36.2903	1.70125e-09	7.62559e-08
Lbr	0	-0.583247	5.3954	8.31877	0.00392391	0.0437155
Lck	0	2.48653	3.02643	8.89397	0.00286127	0.0338545
Ldb2	0	0.640755	6.11429	17.2956	3.19988e-05	0.000688018
Ldha	0	-3.81134	7.26315	559.654	1.17291e-123	1.28618e-120
Ldoc1	0	-0.428635	7.15613	13.9646	0.000186307	0.0033104
Lekr1	0	-1.07243	6.90021	68.3307	1.38589e-16	1.21927e-14
Leng8	0	-8.36638	7.12054	780.338	1.38573e-171	2.50279e-168
Leprotl1	0	0.539644	5.78388	10.262	0.00135808	0.0180707
Lgals12	0	1.69337	3.49557	11.4092	0.000730864	0.0107114
Lgi1	0	0.256766	8.06547	8.68771	0.00320378	0.0369611
Lgi3	0	-0.671496	6.0929	17.2311	3.31022e-05	0.000707779
Lgr5	0	-1.60122	3.80667	13.4615	0.000243535	0.00416109
Lhpp	0	0.74967	5.49621	16.4775	4.92397e-05	0.00100932
Lig1	0	-0.972468	6.45452	43.5133	4.21503e-11	2.24295e-09
Limch1	0	-0.38115	6.9076	9.45703	0.00210353	0.026319
Lims1	0	1.51439	5.67436	71.4353	2.87267e-17	2.6728e-15
Lin7a	0	-0.722564	5.19968	11.0969	0.000864807	0.0123309
Lipa	0	-0.968587	4.46647	10.9722	0.000924973	0.0130397
Lipe	0	1.15774	4.3584	16.2386	5.58526e-05	0.00112526
Lix1l	0	0.752732	5.14098	12.8084	0.000345101	0.00564818
Lman2l	0	-0.401758	7.20667	12.5806	0.0003898	0.00629917
Lmbr1	0	-0.889005	6.16739	30.3261	3.65356e-08	1.36139e-06
Lmbr1l	0	3.30687	3.3451	26.9976	2.03793e-07	6.75001e-06
Lmtk2	0	0.54839	5.93994	11.4674	0.000708337	0.0104357
Lncpint	0	-0.84007	5.99316	24.1915	8.72436e-07	2.59064e-05
Lnpk	0	0.607535	7.04955	27.8676	1.29964e-07	4.47857e-06
Lnx2	0	1.18587	3.77346	8.94303	0.00278543	0.0330591
Lonrf1	0	0.925008	5.23347	20.8031	5.0913e-06	0.00013048
Lpcat4	0	0.760607	7.0748	43.6534	3.92397e-11	2.09533e-09
Lrfn5	0	0.276581	8.82354	14.5663	0.000135333	0.00249565
Lrig2	0	-0.775225	5.86475	19.6472	9.31615e-06	0.000225764
Lrrc24	0	-0.502853	7.03672	17.7783	2.48247e-05	0.000544831
Lrrc28	0	1.80741	4.49749	42.8943	5.78342e-11	3.00973e-09
Lrrc42	0	-0.493201	5.8972	8.38178	0.00379017	0.0423947
Lrrc57	0	2.27504	4.91727	88.799	4.38835e-21	5.3896e-19
Lrrc58	0	2.93076	6.29656	319.657	1.81275e-71	9.59635e-69
Lrrc74b	0	3.00582	3.32974	23.0641	1.56739e-06	4.38698e-05
Lrrc8dos	0	0.697086	5.23601	11.936	0.000550636	0.00843649
Lrrc9	0	-1.89667	3.6308	13.5252	0.000235412	0.00403578
Lrrcc1	0	-1.64456	7.08118	159.915	1.19672e-36	2.84837e-34
Lrrd1	0	2.89567	3.34285	21.1063	4.34594e-06	0.000112891
Lrrfip2	0	1.147	7.0895	99.8194	1.67812e-23	2.30022e-21
Lrrtm4	0	0.734571	8.04664	70.1972	5.38006e-17	4.87284e-15
Lrsam1	0	0.91611	5.18974	19.6681	9.21449e-06	0.000223653
Lrwd1	0	-1.54071	5.75971	63.5257	1.58626e-15	1.26505e-13
Lsamp	0	-0.16943	10.0965	9.19126	0.00243186	0.0296066
Lsm7	0	-0.475653	8.16485	30.5301	3.28898e-08	1.23152e-06
Luc7l3	0	0.291323	10.2607	29.3819	5.94593e-08	2.14277e-06
Ly6h	0	-0.257873	11.2936	31.6758	1.8228e-08	7.07551e-07
Lypd3	0	-1.7396	4.75318	37.229	1.05118e-09	4.84618e-08
Lysmd3	0	2.42011	5.78539	178.076	1.29601e-40	3.34391e-38
Lztfl1	0	0.550008	7.21966	25.2409	5.0616e-07	1.56192e-05
Madd	0	-0.476097	6.9225	14.8813	0.000114507	0.00215299
Mag	0	0.531251	5.95355	10.697	0.00107314	0.0147823
Magea4	0	5.38332	3.69075	74.671	5.57701e-18	5.4971e-16
Magi1	0	-0.35295	7.39226	10.8951	0.000964264	0.0135191
Magt1	0	1.1345	4.67323	20.8848	4.87867e-06	0.000125667
Maip1	0	0.616471	6.0061	15.1062	0.000101644	0.00192766
Malsu1	0	1.33525	4.92113	34.2462	4.85934e-09	2.04666e-07
Malt1	0	1.05862	3.99966	9.34979	0.00223023	0.0276117
Man1a2	0	-0.542147	7.98804	35.1383	3.07304e-09	1.32894e-07
Man2c1	0	3.76189	3.99804	79.9757	3.80302e-19	4.11155e-17
Map1b	0	-0.233461	9.75939	15.3186	9.08287e-05	0.00174248
Map2k3	0	-1.31697	4.35621	17.746	2.52492e-05	0.000553355
Map2k4	0	-0.455108	7.36183	17.6322	2.68064e-05	0.000584977
Map3k1	0	-1.17656	4.09582	10.7939	0.00101843	0.0141621
Map3k20	0	-1.31655	3.9669	11.6804	0.00063166	0.00946534
Map4	0	0.649548	6.6793	25.5572	4.29611e-07	1.346e-05
Map4k1	0	-1.95958	5.38907	70.9251	3.72031e-17	3.4098e-15
Map7	0	0.570221	6.45508	17.1355	3.48113e-05	0.000739687
Mapk14	0	-0.913866	5.75661	24.9267	5.9572e-07	1.81537e-05
Mapk15	0	1.24627	4.86573	29.4258	5.81265e-08	2.10214e-06
Mapk6	0	0.961707	4.2738	10.5318	0.00117347	0.0159851
Mapk8ip1	0	-2.54935	5.98503	158.083	3.00749e-36	6.943e-34
Mapk9	0	-0.363626	6.96302	8.95459	0.00276787	0.0328634
Mapre3	0	-0.320141	8.34308	15.2887	9.22808e-05	0.00176755
Mapt	0	-0.286845	7.99023	10.2312	0.00138097	0.018308
2025-03-01	0	1.41815	3.69342	11.4586	0.000711713	0.0104657
Marf1	0	-0.747299	6.03693	19.8918	8.19713e-06	0.000200705
Mars	0	1.66949	6.01458	107.28	3.88856e-25	5.79584e-23
Mars2	0	1.11212	4.12638	12.2208	0.000472645	0.00741548
Mas1	0	4.57698	4.01936	100.848	9.98235e-24	1.39317e-21
Mast3	0	1.17756	5.99203	53.6569	2.39102e-13	1.5822e-11
Mastl	0	1.04451	4.8776	19.5806	9.64634e-06	0.000232664
Mat2a	0	0.691193	8.10749	65.7504	5.12959e-16	4.30325e-14
Matn2	0	-2.64288	6.55716	231.113	3.50294e-52	1.34443e-49
Mblac1	0	-0.916315	5.0177	15.4135	8.63814e-05	0.00167019
Mc1r	0	-1.414	3.93753	12.1397	0.000493652	0.00770962
Mccc1	0	-0.879423	5.47749	19.17	1.19603e-05	0.000282266
Mccc1os	0	3.24527	2.86226	10.7252	0.00105693	0.0145917
Mcf2l	0	-0.613787	7.17383	28.0092	1.20792e-07	4.18598e-06
Mcmdc2	0	0.615991	5.15397	8.52998	0.0034936	0.0397635
Mdc1	0	-0.789581	4.54699	8.12231	0.00437256	0.0476758
Mdk	0	0.740626	4.73923	9.4767	0.0020811	0.0260915
Mdm2	0	0.527706	6.81027	18.2101	1.97864e-05	0.000443124
Mdm4	0	0.906007	8.03435	106.169	6.81085e-25	1.00539e-22
Med11	0	-3.3939	3.3394	18.828	1.4308e-05	0.000331557
Med16	0	4.8427	3.41443	46.2772	1.0277e-11	5.76866e-10
Med17	0	0.594804	5.77084	12.2677	0.000460913	0.00729477
Med24	0	-0.593986	5.32288	8.22933	0.00412206	0.0453634
Meiob	0	-2.84197	3.15005	10.379	0.00127468	0.0171281
Memo1	0	-1.39953	5.54263	44.7842	2.2022e-11	1.20528e-09
Mest	0	-1.4529	7.42993	159.74	1.30646e-36	3.08566e-34
Mettl2	0	-0.532096	7.00213	19.4102	1.05465e-05	0.000251804
Mettl21e	0	-1.67002	4.03404	18.7848	1.46356e-05	0.000338128
Mfap2	0	-1.01634	6.08583	36.7702	1.33005e-09	6.03216e-08
Mfng	0	-1.36004	3.72798	8.63434	0.00329901	0.0379515
Mfsd1	0	-1.20598	4.7079	19.8895	8.20685e-06	0.000200783
Mfsd2b	0	-3.23864	3.02484	9.85399	0.00169473	0.0218451
Mfsd6	0	-0.78609	6.08869	23.2682	1.40951e-06	4.01091e-05
Mfsd7a	0	1.34046	4.41394	23.3615	1.34279e-06	3.83656e-05
Mical1	0	1.70909	3.92367	21.6636	3.24982e-06	8.6168e-05
Mical3	0	0.511899	7.16862	21.0713	4.42623e-06	0.000114493
Micu1	0	-0.330272	7.26622	8.8264	0.00296919	0.0348894
Mief2	0	-1.02268	5.18941	21.1917	4.15675e-06	0.000108344
Mindy3	0	0.467641	6.07775	9.13017	0.00251441	0.0303734
Mipol1	0	-0.429732	6.38686	8.78781	0.00303264	0.0353912
Mir384	0	-1.8846	3.65801	13.529	0.000234934	0.00402983
Mir670hg	0	0.680588	5.23198	11.3253	0.000764648	0.0111216
Mki67	0	-3.20353	3.22849	14.5934	0.000133394	0.00246435
Mkln1os	0	-0.813778	5.09079	13.0471	0.000303778	0.00505982
Mknk1	0	-0.828888	4.91792	11.8441	0.000578485	0.00878862
Mkrn2os	0	1.96265	3.89992	26.9836	2.05267e-07	6.79152e-06
Mlf1	0	-0.707297	5.31874	11.6744	0.000633707	0.00948676
Mlh3	0	1.14502	4.9066	25.006	5.7171e-07	1.74838e-05
Mllt3	0	-0.483752	6.11266	9.02054	0.00266976	0.0318463
Mlst8	0	0.843401	5.22015	17.2022	3.36097e-05	0.000716633
Mlx	0	1.09762	6.45785	63.116	1.95294e-15	1.53358e-13
Mmachc	0	-1.15112	4.80702	20.0917	7.38315e-06	0.000182669
Mmadhc	0	0.708054	6.82231	33.1168	8.68349e-09	3.52203e-07
Mmgt2	0	-1.2253	6.73391	77.645	1.23719e-18	1.27045e-16
Mmp16	0	-0.532023	5.94076	10.065	0.00151122	0.0197365
Mmp9	0	1.09138	3.9146	9.26249	0.00233908	0.0287161
Mob1a	0	-1.46354	5.07608	36.2144	1.76882e-09	7.91688e-08
Mob4	0	-1.06618	7.72824	110.35	8.26615e-26	1.29492e-23
Morc3	0	0.55112	5.54787	9.02693	0.00266044	0.0317877
Morf4l2	0	-1.14422	8.52593	196.387	1.30911e-44	4.06009e-42
Morn4	0	0.50772	5.98328	10.2556	0.00136278	0.0181207
Mospd2	0	0.81475	5.18343	15.7875	7.08781e-05	0.00139682
Mospd3	0	0.532785	5.95958	11.1095	0.000858924	0.0122605
Mphosph8	0	0.203907	9.09809	9.11667	0.00253304	0.0305477
Mpp5	0	-0.596783	6.11765	13.9183	0.00019095	0.00338116
Mpp6	0	0.343292	6.92004	8.14705	0.0043133	0.0471469
Mpped1	0	0.706583	4.70075	8.25264	0.00406945	0.0449616
Mri1	0	1.29156	5.07062	36.097	1.87868e-09	8.372e-08
Mro	0	-1.6729	5.20657	49.3087	2.18977e-12	1.33934e-10
Mroh8	0	-1.20529	4.97829	24.1613	8.86233e-07	2.62654e-05
Mrpl27	0	0.407887	6.43591	8.75232	0.00309222	0.0359635
Mrpl34	0	0.434148	6.29027	9.02439	0.00266414	0.0317916
Mrpl42	0	0.506241	6.15791	11.2709	0.000787371	0.0113874
Mrpl45	0	-0.564101	5.66704	9.38011	0.00219365	0.0272577
Mrpl49	0	-0.87103	5.60374	20.715	5.33093e-06	0.000135947
Mrpl50	0	-1.05443	5.65561	29.6917	5.06755e-08	1.84791e-06
Mrpl51	0	0.522568	6.86307	18.5384	1.6655e-05	0.000380205
Mrpl54	0	-0.582745	6.70263	19.315	1.10855e-05	0.000263444
Mrps10	0	0.525523	6.01144	11.1905	0.000822253	0.0118195
Mrps2	0	-0.643275	5.13882	8.43329	0.00368429	0.0413459
Mrps21	0	0.691653	6.5155	26.5965	2.50795e-07	8.1832e-06
Mrps24	0	0.406071	6.90777	11.4235	0.000725257	0.0106445
Mrps26	0	-0.340739	7.36424	10.0992	0.00148343	0.0194646
Mrps7	0	-0.638678	7.49325	36.9568	1.20863e-09	5.5223e-08
Mrps9	0	0.592101	5.66711	11.3679	0.000747306	0.0109107
Msantd1	0	1.47611	3.70892	12.8326	0.000340662	0.00559341
Msh2	0	0.572143	5.25537	8.07554	0.00448685	0.0487144
Msh3	0	0.60701	5.73314	12.2328	0.000469611	0.00738674
Msh5	0	-5.77016	4.11513	86.7985	1.20634e-20	1.44685e-18
Msh6	0	-1.5351	4.72346	29.2376	6.40554e-08	2.28959e-06
Msi1	0	-0.779055	5.1586	12.1444	0.0004924	0.00769397
Msmo1	0	0.335893	7.88781	13.7463	0.00020926	0.00365271
Mst1	0	2.09971	3.89539	30.7679	2.90963e-08	1.09214e-06
Msto1	0	0.491334	7.58684	24.7215	6.62649e-07	2.00453e-05
Mtcl1	0	-1.44258	5.27592	41.5127	1.17216e-10	5.89034e-09
Mterf3	0	-0.503161	5.87473	8.57218	0.00341353	0.0390582
Mtf2	0	-0.657301	7.27285	34.2373	4.88146e-09	2.05315e-07
Mtfmt	0	-0.994059	5.80234	29.7622	4.88645e-08	1.79252e-06
Mtfp1	0	-0.505252	6.04215	9.62941	0.00191497	0.0242764
Mthfd2l	0	0.577828	6.06485	13.8889	0.000193964	0.00342466
Mtmr2	0	0.456856	5.96107	8.1159	0.00438805	0.0478277
Mtmr3	0	0.648119	5.3017	10.6855	0.00107986	0.0148616
Mtmr4	0	-1.57757	5.6849	61.6543	4.10188e-15	3.14075e-13
Mtr	0	-0.821729	4.75258	10.3511	0.00129406	0.0173429
Muc2	0	3.31328	2.86169	11.1606	0.000835584	0.0119775
Mum1	0	1.55532	6.57651	131.561	1.88355e-30	3.42204e-28
Mvb12a	0	-0.608488	5.63217	10.6242	0.00111627	0.0153009
Mvp	0	1.4079	3.71937	11.5093	0.000692558	0.0102429
Mxra8	0	-0.86959	4.36642	8.23712	0.00410439	0.0452176
Mybpc2	0	3.6237	2.98001	15.2097	9.62197e-05	0.00183271
Mycbp	0	-0.732615	6.3956	24.8701	6.13468e-07	1.86494e-05
Mycbpap	0	0.999847	5.15815	22.0303	2.68446e-06	7.16728e-05
Myg1	0	-0.853136	6.57116	36.6553	1.41074e-09	6.36989e-08
Myh11	0	-1.57744	3.55495	8.48907	0.00357303	0.0404224
Myl6	0	0.318785	9.51884	26.7429	2.32491e-07	7.64682e-06
Mylip	0	1.11028	3.87385	9.03145	0.00265387	0.0317431
Myo10	0	-2.88552	5.44427	128.158	1.04544e-29	1.84478e-27
Myo16	0	0.722889	5.4328	14.4706	0.000142378	0.00261146
Myo3b	0	2.88593	3.0896	12.6794	0.00036974	0.00599344
Myo5a	0	0.355227	7.29531	10.8805	0.000971877	0.0136072
Myo5b	0	1.20277	3.69256	8.29634	0.00397268	0.0441147
Myo9b	0	1.02605	4.46111	14.3723	0.000171942	0.00307832
Mypop	0	-0.488091	5.96155	8.65094	0.00326909	0.0376497
Mzf1	0	-0.845248	5.52769	18.489	1.70917e-05	0.000389595
Naa10	0	2.00653	5.90313	139.539	3.39107e-32	6.67433e-30
Naa35	0	-0.803171	7.72492	64.9284	7.78427e-16	6.35661e-14
Naaladl2	0	-1.5061	4.20102	18.3153	1.87237e-05	0.000422714
Nabp1	0	-0.570793	5.72488	9.88511	0.00166632	0.0215331
Nabp2	0	-0.524223	6.37399	12.8939	0.000329685	0.00543643
Nadk2	0	1.35078	5.70329	59.6843	1.1157e-14	8.19534e-13
Naf1	0	-1.26255	5.68089	42.4904	7.11e-11	3.66284e-09
Naglu	0	-0.788856	4.70559	9.22498	0.00238747	0.0291202
Naip6	0	-3.2451	3.30944	16.7478	4.26991e-05	0.000888835
Nanos3	0	-1.5935	4.21465	21.2874	3.95414e-06	0.000103414
Nars	0	-0.400615	7.52474	15.0808	0.00010302	0.00195135
Nat14	0	-7.51135	6.40396	466.665	1.90432e-103	1.53869e-100
Nat8f5	0	-1.08278	4.13942	9.81109	0.00173473	0.0222393
Nat9	0	-0.560598	5.49658	8.4849	0.00358123	0.0405002
Ncapd3	0	0.563301	6.66896	19.099	1.24134e-05	0.000291615
Nckap5	0	0.769225	4.86083	10.8333	0.000996997	0.0138955
Ncl	0	1.38834	7.06713	143.011	5.90758e-33	1.19333e-30
Ncoa1	0	-0.448034	6.48367	10.0665	0.00151001	0.0197291
Ncoa6	0	0.71492	5.73907	17.2543	3.27016e-05	0.000700677
Ndor1	0	-0.93094	4.43903	9.96102	0.00159899	0.0207153
Ndufab1	0	0.503146	8.10307	35.037	3.23721e-09	1.39243e-07
Ndufaf2	0	0.463643	6.14775	9.47189	0.00208656	0.0261386
Ndufaf3	0	-0.827386	6.89789	42.4086	7.41342e-11	3.81276e-09
Ndufv2	0	-0.475483	9.35372	53.6913	2.34958e-13	1.55813e-11
Nectin1	0	-0.7018	5.36624	11.8799	0.000567484	0.00866436
Nefl	0	-0.30676	8.02649	11.8214	0.000585582	0.00887887
Nek10	0	-0.662724	5.18938	9.35449	0.00222452	0.0275855
Nemp1	0	3.19603	3.93245	59.981	9.59581e-15	7.1339e-13
Nemp2	0	2.0055	3.80083	24.5041	7.41775e-07	2.22199e-05
Neo1	0	0.677171	6.08549	18.9054	1.3739e-05	0.000319577
Nf2	0	0.947216	5.13069	20.3609	6.41409e-06	0.000161029
Nfe2l3	0	1.88481	4.74381	56.696	5.0953e-14	3.59646e-12
Nfic	0	2.37485	7.76811	552.35	4.53365e-122	4.80004e-119
Nfxl1	0	-1.07268	5.80671	34.0533	5.36562e-09	2.2384e-07
Nfyb	0	-0.832108	6.01664	24.573	7.15725e-07	2.15236e-05
Nhlrc3	0	0.810563	6.29512	31.4769	2.01935e-08	7.75026e-07
Nicn1	0	-0.662295	6.9775	28.8628	7.77255e-08	2.7545e-06
Nipa2	0	-0.468058	6.60703	11.8361	0.000580967	0.00882196
Nipsnap1	0	0.360238	6.99388	9.41822	0.00214852	0.0267728
Nipsnap3a	0	-2.33851	3.26785	9.31126	0.00227763	0.0281191
Nit1	0	0.494256	8.19952	35.0885	3.1527e-09	1.36147e-07
Nkain4	0	-0.951978	4.40716	10.2019	0.00140307	0.018537
Nkiras1	0	1.22163	6.64761	86.2697	1.57604e-20	1.88291e-18
Nktr	0	-0.209474	8.77245	8.14501	0.00431817	0.0471833
Nlrc5	0	-1.79288	3.85102	16.8479	4.05053e-05	0.000845463
Nmb	0	-1.01465	4.33636	10.6843	0.00108053	0.0148641
Nmd3	0	-0.57359	6.37543	15.1488	9.93726e-05	0.00188808
Nme6	0	1.37022	5.13837	41.3583	1.26846e-10	6.35346e-09
Nmral1	0	0.659057	5.34489	11.5057	0.000693872	0.0102475
Noa1	0	0.902518	5.29211	20.6944	5.38855e-06	0.000137303
Noc2l	0	0.42153	6.67179	10.4211	0.00124593	0.0168154
Nol11	0	0.71689	5.73223	17.3373	3.13031e-05	0.000675425
Nol8	0	-0.538596	6.7863	17.5457	2.80529e-05	0.000610012
Nom1	0	-1.53116	4.55185	27.0939	1.93884e-07	6.46365e-06
Nomo1	0	-0.629274	5.18356	8.49399	0.00356337	0.0403487
Nop14	0	-0.64453	6.8479	25.0093	5.70735e-07	1.74714e-05
Nop16	0	-0.938855	5.1942	18.1749	2.01553e-05	0.0004504
Nop58	0	-0.843548	7.61009	66.338	3.80749e-16	3.23837e-14
Nos1ap	0	-0.544339	6.83894	18.1493	2.04288e-05	0.000455846
Nosip	0	0.320746	8.31156	15.798	7.04861e-05	0.00139088
Nov	0	0.927003	4.33578	10.7845	0.00102361	0.0142277
Nova1	0	-1.8674	9.10471	610.193	1.22831e-134	1.39682e-131
Noxred1	0	1.4518	3.49762	8.89266	0.00286333	0.0338623
Npepps	0	-0.483009	6.82855	14.2056	0.000163905	0.00295859
Nphp3	0	1.2578	5.59538	47.4807	5.56157e-12	3.22193e-10
Nphp4	0	0.873599	4.97936	15.5132	8.19408e-05	0.00158933
Npm3	0	-0.526326	6.01977	10.3417	0.00130065	0.0174161
Npsr1	0	1.64354	3.6341	13.9197	0.000190806	0.00338055
Nptx1	0	-0.660615	5.67451	12.681	0.000369422	0.00599194
Nr2f1	0	1.69796	5.9963	110.599	7.2894e-26	1.15368e-23
Nr2f2	0	0.512335	7.31513	23.2213	1.44431e-06	4.08344e-05
Nrcam	0	-0.228297	8.50561	8.31583	0.00393028	0.0437705
Nrd1	0	-0.375781	7.66522	14.3172	0.000154467	0.00279974
Nrf1	0	-1.50105	5.25356	43.2047	4.93518e-11	2.59469e-09
Nrg3	0	-0.534325	6.98604	18.9266	1.35875e-05	0.000316294
Nrip3	0	-0.523943	6.35037	12.5025	0.000406445	0.00652352
Nrsn1	0	-0.322979	7.69038	10.9743	0.000923905	0.0130306
Nrsn2	0	0.160609	10.046	8.31236	0.00393779	0.0438065
Nrxn2	0	-0.535324	8.67803	49.4146	2.07467e-12	1.27147e-10
Nsa2	0	-0.638446	7.09257	29.0753	6.96498e-08	2.47801e-06
Nsd2	0	-0.397619	7.44857	14.2958	0.000156233	0.00283007
Nsd3	0	0.470432	7.22419	18.3212	1.86657e-05	0.000422027
Nsmaf	0	-0.468681	6.09067	8.56535	0.00342636	0.0391526
Nsmce2	0	-0.496413	6.22757	10.3772	0.00127591	0.0171371
Nsun3	0	0.899256	5.42406	22.544	2.05443e-06	5.59212e-05
Nsun5	0	-0.495507	6.54171	12.7356	0.000358798	0.00584121
Nsun6	0	0.636355	7.05069	30.2272	3.84478e-08	1.42573e-06
Nsun7	0	-1.3389	5.61823	44.7868	2.19933e-11	1.20528e-09
Nt5c3b	0	-0.329398	7.92068	12.9035	0.000328007	0.00541167
Nt5dc1	0	2.12042	4.43072	54.6255	1.46057e-13	9.94355e-12
Ntmt1	0	-0.533641	5.61208	8.23983	0.00409827	0.0451663
Ntrk3	0	-0.315998	7.91195	11.5082	0.000692971	0.0102441
Nuak1	0	-1.01015	4.45122	12.0233	0.000525432	0.00811921
Nubpl	0	-1.85321	4.38107	31.6421	1.85465e-08	7.17573e-07
Nudt10	0	-0.532021	6.18981	11.5467	0.000678754	0.0100679
Nudt12os	0	-2.02564	3.4079	10.352	0.00129342	0.017342
Nudt19	0	1.10071	5.56797	36.6938	1.38317e-09	6.25461e-08
Nudt3	0	0.60902	6.89546	25.3725	4.72766e-07	1.46624e-05
Nudt5	0	0.33509	7.18142	9.02801	0.00265887	0.0317877
Nudt8	0	0.682231	4.91766	9.07751	0.00258785	0.0310745
Nufip2	0	-0.488235	7.69272	24.4175	7.75874e-07	2.31961e-05
Nup37	0	0.938557	5.40625	24.1889	8.73643e-07	2.59172e-05
Nupr1l	0	-3.7137	3.15194	15.1968	9.68787e-05	0.00184412
Nvl	0	-0.780028	6.96938	39.1036	4.02233e-10	1.9237e-08
Nxf2	0	0.762053	4.95707	11.6179	0.000653266	0.0097463
Oat	0	0.831067	5.18858	16.362	5.23307e-05	0.00106267
Ociad1	0	-0.253979	9.61722	17.3928	3.0402e-05	0.000657832
Ocrl	0	0.409944	7.85788	19.8567	8.34884e-06	0.000203932
Odf2l	0	0.921813	6.0848	35.7217	2.27776e-09	1.00483e-07
Ogdhl	0	2.5714	3.78079	33.9442	5.67505e-09	2.36107e-07
Ogfod1	0	-1.25068	6.33726	63.3221	1.75898e-15	1.38837e-13
Ogg1	0	0.945412	4.51619	12.8005	0.000346551	0.00566889
Ogt	0	0.581136	7.45423	32.5882	1.13967e-08	4.5682e-07
Onecut2	0	-0.809763	4.88777	11.1528	0.000839113	0.0120169
Oosp3	0	-5.58217	3.98584	74.7582	5.33597e-18	5.28502e-16
Oprk1	0	1.01219	4.50563	14.329	0.000153501	0.00278387
Orc3	0	-0.512301	6.10128	10.2799	0.00134497	0.0179235
Orc4	0	0.62664	6.69105	23.9029	1.01353e-06	2.96093e-05
Osbpl11	0	-3.28432	5.48751	153.725	2.69162e-35	5.90311e-33
Osbpl9	0	-0.417313	6.57387	9.2589	0.00234366	0.0287609
Oscp1	0	2.33894	4.91257	95.9064	1.21021e-22	1.60165e-20
Otof	0	1.0527	4.11222	10.768	0.0010328	0.0143179
Otud7a	0	1.92061	4.39165	44.8469	2.1329e-11	1.17153e-09
Oxa1l	0	0.765655	6.90219	40.7241	1.75466e-10	8.71764e-09
Oxnad1	0	-1.99711	5.73362	94.2958	2.72988e-22	3.55162e-20
Oxr1	0	-0.50683	7.49412	23.3608	1.34325e-06	3.83656e-05
Oxt	0	0.387932	8.11754	20.5267	5.88194e-06	0.000148641
P2ry14	0	-1.25327	7.38934	119.289	9.11911e-28	1.56421e-25
P3h4	0	-0.683843	6.0665	17.6036	2.7212e-05	0.000592565
P4ha1	0	-0.467321	7.10043	15.9628	6.46103e-05	0.00128567
Pabpc1	0	-0.720303	6.81867	30.849	2.79053e-08	1.04872e-06
Pabpc4	0	2.99256	5.44346	191.027	1.93354e-43	5.82033e-41
Pacs2	0	0.658897	5.61091	13.7044	0.000213981	0.00373088
Paf1	0	-0.517294	6.37383	12.342	0.000442918	0.00703158
Pafah1b2	0	-0.397457	7.42106	14.0526	0.000177789	0.00317005
Pafah1b3	0	0.417006	7.47455	16.8928	3.95584e-05	0.000828514
Paics	0	-3.14583	5.90614	189.826	3.53443e-43	1.02378e-40
Paip1	0	-0.314558	7.65429	10.0866	0.00149365	0.0195736
Paip2	0	-1.9598	7.10982	217.034	4.10943e-49	1.50209e-46
Pak6	0	0.860376	4.94679	14.8002	0.000119536	0.00223386
Pald1	0	1.05022	5.43076	30.2165	3.86605e-08	1.43188e-06
Palm	0	0.60905	6.15988	16.2788	5.46814e-05	0.00110602
Pam16	0	0.501107	7.20568	20.9783	4.6462e-06	0.000119981
Pan2	0	0.6272	5.03193	8.2885	0.00398986	0.0442574
Pank2	0	0.470324	5.90821	8.31269	0.00393707	0.0438065
Pank3	0	1.0361	5.29631	27.1308	1.90223e-07	6.36233e-06
Panx1	0	-0.731161	4.98496	9.86521	0.00168443	0.021732
Papd4	0	-0.801732	6.06937	23.6708	1.14339e-06	3.30882e-05
Papola	0	0.523342	7.69	29.4415	5.76574e-08	2.08763e-06
Paqr3	0	0.919674	4.67494	13.7696	0.000206677	0.00360967
Paqr9	0	0.647293	5.80339	14.8448	0.000116744	0.00219102
Parl	0	0.52928	5.67763	9.16661	0.00246483	0.0298895
Parm1	0	-0.732776	5.11275	10.7669	0.00103337	0.0143179
Parp6	0	-0.55213	8.49583	47.4846	5.55038e-12	3.22153e-10
Patj	0	-0.808715	5.17937	13.7788	0.000205668	0.00359663
Paxbp1	0	0.646782	8.26644	61.1709	5.24327e-15	3.96525e-13
Paxip1	0	1.6749	4.78164	46.742	8.10705e-12	4.60109e-10
Pbx2	0	-0.499347	5.80428	8.08749	0.00445737	0.0484285
Pcbp4	0	-0.296733	8.29746	12.9579	0.000318607	0.00527643
Pcdh10	0	-0.546838	7.91075	34.06	5.34706e-09	2.23673e-07
Pcdh15	0	0.71451	6.77343	32.3516	1.28724e-08	5.12627e-07
Pcdh9	0	0.556655	9.65502	84.824	3.27373e-20	3.75062e-18
Pcgf6	0	-0.582244	6.09256	13.0531	0.000302811	0.00505025
Pcm1	0	-0.386227	8.06732	18.8568	1.40937e-05	0.000327332
Pcmtd2	0	1.21285	7.99267	187.024	1.44482e-42	3.99657e-40
Pcnx2	0	0.543987	6.21485	13.3048	0.00026475	0.00448119
Pcsk1n	0	-0.30157	10.8713	38.2927	6.09381e-10	2.85655e-08
Pcsk4	0	-0.671513	6.62027	24.1043	9.12853e-07	2.69762e-05
Pcyox1	0	-0.529892	6.86186	17.4988	2.87539e-05	0.00062437
Pdcd11	0	0.587304	6.26236	15.9929	6.3591e-05	0.00126703
Pdcd5	0	0.33533	7.70503	12.4625	0.000415237	0.00664725
Pdcd6	0	0.685356	7.40542	43.993	3.29885e-11	1.77698e-09
Pdcd7	0	-0.845227	7.96073	81.1953	2.05185e-19	2.242e-17
Pde4b	0	-2.99422	5.00339	96.4114	9.37814e-23	1.24652e-20
Pde4d	0	-0.425578	8.76064	31.8996	1.62438e-08	6.35315e-07
Pde6a	0	-4.232	3.74362	43.7305	3.77234e-11	2.01787e-09
Pde6b	0	2.90447	2.95856	10.4554	0.00122299	0.0165494
Pde6d	0	-0.314572	7.52981	9.46177	0.0020981	0.0262617
Pde7b	0	0.97409	4.40916	12.2368	0.000468612	0.0073786
Pde9a	0	0.704642	5.28066	12.6336	0.000378918	0.00613301
Pdf	0	2.00274	3.68884	21.2446	4.04354e-06	0.000105572
Pdgfra	0	1.98369	4.04333	31.606	1.88949e-08	7.28832e-07
Pdgfrl	0	-1.52464	3.87808	12.8723	0.000333509	0.00548771
Pdhb	0	-0.370085	7.87404	15.8932	6.70286e-05	0.00132777
Pdlim7	0	0.257623	8.80435	12.8301	0.00034112	0.00559795
Pds5a	0	-0.411692	6.45125	8.33753	0.00388361	0.0433294
Pdzd9	0	-3.83313	5.28494	154.387	1.92937e-35	4.29271e-33
Pecr	0	-1.41632	4.04438	13.8226	0.000200924	0.00353129
Pef1	0	4.72012	4.19209	132.433	1.21374e-30	2.23153e-28
Peg3	0	-0.374843	10.7178	55.5917	8.93459e-14	6.13709e-12
Penk	0	0.389849	7.87312	18.3591	1.82977e-05	0.000414928
Pepd	0	0.500282	5.83663	8.92831	0.00280798	0.0332753
Per2	0	-0.839834	4.56466	9.24001	0.00236797	0.0289665
Pex1	0	0.626246	5.37248	10.3958	0.00126312	0.0170089
Pex19	0	0.629991	5.59474	12.3362	0.000444305	0.00704646
Pex6	0	-1.82589	5.4283	66.6334	3.27757e-16	2.80319e-14
Pfkm	0	-0.701699	6.82529	29.7048	5.03355e-08	1.83769e-06
Pgam1	0	-0.369286	8.26986	19.6327	9.38679e-06	0.000227117
Pgd	0	-0.504444	5.99237	9.42809	0.00213698	0.0266723
Pgk1	0	4.62791	7.27762	1010.78	1.37106e-221	4.2097e-218
Pgp	0	0.276916	8.11394	10.5108	0.00118687	0.0161389
Pgr	0	0.504226	5.68409	8.2863	0.0039947	0.0442599
Phf1	0	-0.356138	7.03303	9.00025	0.00269957	0.0321501
Phf10	0	-0.927809	6.59914	43.2952	4.71198e-11	2.48585e-09
Phf20l1	0	1.2108	7.58806	145.049	2.11851e-33	4.33645e-31
Phf21a	0	-0.416917	6.58728	9.27495	0.00232322	0.02859
Phf3	0	-3.39435	7.13033	453.469	1.40886e-100	1.08144e-97
Phospho2	0	-1.29783	5.80295	47.9549	4.36666e-12	2.56847e-10
Phtf1	0	0.401414	6.6476	9.49028	0.00206575	0.0259202
Phtf1os	0	1.01259	5.51293	29.5769	5.37661e-08	1.95829e-06
Phtf2	0	0.853864	5.56812	22.0814	2.61399e-06	6.99128e-05
Pi4ka	0	-0.477923	6.6818	12.7668	0.000352861	0.00575983
Pias4	0	-1.33074	5.68485	46.1417	1.10124e-11	6.14771e-10
Picalm	0	-0.417781	6.77013	10.4559	0.00122263	0.0165494
Pid1	0	-3.94084	5.662	202.676	5.561e-46	1.85592e-43
Piga	0	-6.39516	7.0215	679.076	1.34275e-149	1.87399e-146
Pigb	0	-1.56903	5.45623	54.3339	1.69425e-13	1.1408e-11
Pigl	0	1.0552	6.26846	51.2113	8.30568e-13	5.22577e-11
Pign	0	-0.999789	5.19889	19.9247	8.0572e-06	0.000197752
Pigv	0	3.19794	6.22838	344.108	8.64115e-77	5.20231e-74
Pik3c2a	0	-0.805427	7.00525	42.2588	8.00363e-11	4.09572e-09
Pik3r2	0	0.695468	6.30019	23.2494	1.42335e-06	4.03906e-05
Pikfyve	0	-1.04148	6.82592	61.5472	4.33112e-15	3.30803e-13
Pin4	0	0.585629	5.97954	13.6291	0.000222728	0.0038571
Pink1	0	0.385094	6.65952	8.87147	0.00289676	0.0341823
Pitpnb	0	0.634122	6.64896	23.8772	1.02716e-06	2.99504e-05
Pitpnc1	0	0.546344	6.03431	12.0081	0.000529743	0.00817348
Pknox1	0	-1.30156	4.44399	18.8237	1.43403e-05	0.000332054
Pknox2	0	0.809467	4.70328	11.0926	0.00086677	0.0123496
Pla2g7	0	0.57746	6.46235	17.8306	2.41516e-05	0.000531578
Plag1	0	0.956162	4.2435	10.0617	0.00151392	0.0197633
Plcb1	0	-0.434465	7.84512	21.1526	4.24227e-06	0.000110292
Plcd3	0	-1.87689	4.28112	29.5495	5.45313e-08	1.9838e-06
Pld1	0	1.11527	3.94839	9.93162	0.00162473	0.0210222
Plekhb1	0	-0.566389	5.60301	9.18099	0.00244555	0.0297144
Plekhd1	0	1.2659	4.39228	20.1272	7.24759e-06	0.000179895
Plekhg1	0	-1.19631	4.92169	23.206	1.45588e-06	4.10482e-05
Plekhg5	0	0.727819	4.94028	10.5152	0.00118406	0.0161079
Plekhh1	0	0.796449	5.05686	13.3731	0.000255288	0.00433646
Plekhm3	0	-0.614631	5.45292	9.66074	0.00188259	0.0239152
Plk4	0	-0.759512	4.74078	8.71625	0.00315402	0.0364749
Plk5	0	-3.04645	3.22693	12.9048	0.000327779	0.00541082
Pln	0	-2.98901	3.61396	25.21	5.1434e-07	1.58557e-05
Plp2	0	-1.42634	3.72326	9.42287	0.00214308	0.0267375
Plpp1	0	5.73327	4.68643	238.754	7.56968e-54	3.09893e-51
Plpp6	0	0.96398	5.85415	33.0757	8.86934e-09	3.59267e-07
Plppr3	0	1.10193	7.49179	117.501	2.24562e-27	3.74725e-25
Plppr4	0	-0.365185	6.80952	8.28653	0.00399419	0.0442599
Plvap	0	0.680585	5.60113	14.4556	0.000143518	0.00262922
Plxna2	0	-0.537837	5.76394	9.06296	0.00260853	0.0312738
Pm20d2	0	0.918508	6.30052	40.4826	1.98553e-10	9.83286e-09
Pmfbp1	0	-1.63074	3.52205	8.72679	0.00313583	0.0363057
Pmpca	0	-0.478871	6.43814	11.1171	0.000855419	0.0122162
Pms1	0	-0.934853	5.52837	22.304	2.32785e-06	6.28621e-05
Pnisr	0	-0.18883	9.61205	9.58452	0.00196236	0.0247952
Pnp2	0	5.41259	4.02209	117.827	1.90595e-27	3.19782e-25
Pnrc2	0	-0.989931	7.36082	78.0815	9.91906e-19	1.03239e-16
Poc5	0	0.919709	5.22296	20.449	6.12569e-06	0.000154293
Podnl1	0	1.65192	4.15627	27.1252	1.90768e-07	6.37361e-06
Pogz	0	0.508687	6.00907	10.3906	0.00126665	0.0170426
Poldip3	0	0.571432	7.65667	34.9164	3.4439e-09	1.4743e-07
Pole4	0	0.385653	6.77855	9.60312	0.00194258	0.0245756
Polr1a	0	1.09908	4.27695	13.7908	0.000204358	0.00358139
Polr1d	0	2.11132	4.90122	78.837	6.76717e-19	7.14018e-17
Polr2e	0	-1.05639	6.26036	44.4218	2.65003e-11	1.43757e-09
Polr3c	0	0.585781	6.00295	13.7985	0.000203521	0.00356877
Pomc	0	-1.03395	5.21725	21.3947	3.73889e-06	9.82027e-05
Pou3f3	0	-1.11053	4.73942	17.7474	2.52303e-05	0.000553336
Pou6f1	0	-1.39741	6.09494	66.1001	4.29573e-16	3.62352e-14
Ppa1	0	-2.02818	7.7648	340.1	6.43822e-76	3.80152e-73
Ppcs	0	0.899853	4.15095	8.21469	0.00415543	0.0456866
Ppfibp1	0	0.733064	6.10841	22.6536	1.9405e-06	5.31418e-05
Ppil3	0	-0.61011	5.2674	8.46522	0.00362018	0.0408298
Ppil6	0	1.92843	4.57449	51.979	5.61789e-13	3.64676e-11
Ppip5k1	0	0.579829	6.23856	15.318	9.08581e-05	0.00174248
Ppm1a	0	-0.648647	6.23896	17.7035	2.58195e-05	0.000564646
Ppm1e	0	-0.951933	6.27311	37.2838	1.02205e-09	4.71895e-08
Ppp1cc	0	-0.643668	5.46465	10.6383	0.00110779	0.015205
Ppp1r12a	0	-0.344106	7.11531	8.79341	0.00302335	0.0353365
Ppp1r12c	0	-0.428688	6.7065	10.6858	0.00107966	0.0148616
Ppp1r16a	0	-0.591696	5.94965	12.5075	0.000405352	0.00650937
Ppp2r2c	0	0.605247	5.96902	14.4234	0.000145995	0.00266823
Ppp2r2cos	0	1.39723	3.72656	10.8231	0.0010025	0.0139532
Ppp2r3a	0	0.452972	6.93434	14.4465	0.000144214	0.0026404
Ppp2r5c	0	0.386435	6.68529	9.06425	0.00260669	0.031264
Ppp4r4	0	0.694348	5.73624	16.4937	4.88187e-05	0.00100263
Ppp6c	0	-0.895112	6.17731	31.372	2.13141e-08	8.13964e-07
Ppwd1	0	-0.352812	7.49639	11.5399	0.000681221	0.0100947
Prcd	0	-0.960806	6.62809	46.9333	7.35303e-12	4.19642e-10
[truncated: 62,345 more rows]
