# Supplementary material for: Cellular evolution of the hypothalamic preoptic area of behaviorally divergent deer mice
Source: eLife. 2025 Apr 7;13:RP103109. doi: 10.7554/eLife.103109 (PMC11975375; doi:10.7554/eLife.103109)
Supplement: Supplementary file 4. [file elife-103109-supp4.xlsx]

## Sheet: Sheet1
Supplementary File 4 - Significantly Differentially Expressed Genes Across Sex
Gene	Cell cluster	P. maniculatus					P. polionotus
		Log2FC (male/female)	LogCPM	F	Pvalue	FDR	Log2FC (male/female)	LogCPM	F	Pvalue	FDR
4921511C10Rik	0	1.31023	5.08619	18.5668	1.64157e-05	0.0235872	1.07972	5.31053	10.0258	0.00154392	1
4933412L11Rik	0	1.147	6.34326	31.6637	1.8363e-08	4.33707e-05	0.893135	5.88193	9.65524	0.00188847	1
AC147615.2	0	-1.08233	6.31825	33.9445	5.68206e-09	1.73585e-05	-0.242702	6.81419	1.56697	0.210649	1
Abcf1	0	0.861738	6.36689	19.7891	8.65362e-06	0.0139842	-0.343292	6.05235	1.94747	0.162862	1
Arl5b	0	1.67799	5.48642	35.8412	2.14541e-09	7.31918e-06	0.303392	5.98743	1.43884	0.23033	1
C130073E24Rik	0	-0.0439995	9.91737	0.369018	0.543541	1	0.408042	9.49936	21.8313	2.97956e-06	0.0130692
Chdh	0	1.71601	5.13559	30.2255	3.85235e-08	8.44876e-05	-0.153627	5.77829	0.322091	0.570354	1
D830024N08Rik	0	1.06342	7.19924	48.3996	3.49014e-12	1.78602e-08	0.14691	8.17968	1.36107	0.243354	1
Dctn1	0	0.0614984	7.45049	0.212968	0.644451	1	-1.00438	8.02556	56.9637	4.46364e-14	4.56838e-10
Fam136b-ps	0	1.67663	4.63953	20.6312	5.57222e-06	0.00950497	8.92472e-17	2.90599	0	1	1
Fbln2	0	-1.51237	4.42454	18.3536	1.83586e-05	0.02385	0.427422	4.79021	1.10044	0.294172	1
Gm24336	0	1.64212	4.59552	18.5113	1.69007e-05	0.0235872	0.063469	6.21245	0.0716606	0.788934	1
Gm26538	0	-1.7037	4.84875	32.254	1.35522e-08	3.46756e-05	0.641191	4.1708	1.06065	0.303068	1
Gm26699	0	1.87888	6.3885	72.9605	1.33453e-17	1.02439e-13	0.0028111	7.13193	0.000263112	0.987058	1
Gm38217	0	3.54236	3.94086	25.7549	3.88089e-07	0.000700934	-0.459776	3.23114	0.0843248	0.77152	1
Gm43888	0	-0.314592	3.20531	0.134964	0.71334	1	1.44682	6.07075	27.4511	1.61328e-07	0.000825569
Gm45464	0	1.74832	4.41103	17.0434	3.65536e-05	0.0415529	-0.563791	3.22624	0.111683	0.738236	1
Gnrh1	0	-1.44063	5.6726	33.7688	6.21883e-09	1.73585e-05	-0.0825285	4.24356	0.0205073	0.886129	1
Gtf2a2	0	1.34921	8.35907	148.817	3.26181e-34	5.00753e-30	-0.0209806	7.419	0.0175576	0.894585	1
Jpx	0	-3.00173	4.00391	37.774	7.96262e-10	3.05605e-06	-2.01983	4.4526	15.6567	7.59761e-05	0.193591
Lrp1b	0	0.332514	9.43553	16.9751	3.78935e-05	0.0415529	0.408597	9.38266	20.5614	5.77935e-06	0.0221812
Mastl	0	3.11492	4.45719	40.686	1.7927e-10	7.86332e-07	0.609586	5.33583	3.44606	0.0634045	1
Mcl1	0	0.863385	6.33479	19.1209	1.22777e-05	0.0188487	0.0630197	5.95096	0.0612737	0.804494	1
Nfic	0	-0.260382	6.29769	1.92815	0.164963	1	-0.882705	8.67171	63.4688	1.64029e-15	2.51817e-11
Nsun6	0	0.716742	6.76933	17.818	2.43218e-05	0.0298711	0.485059	7.37322	8.90463	0.00284493	1
Sh3bgrl	0	0.604857	7.93623	25.7594	3.8719e-07	0.000700934	0.310522	6.62612	2.2968	0.129643	1
Snhg11	0	0.155107	14.0447	17.1004	3.54733e-05	0.0415529	0.26593	13.7202	55.3435	1.01729e-13	7.80874e-10
Srrd	0	-1.4789	6.2958	61.9789	3.4941e-15	2.14566e-11	-0.711849	5.53898	5.90382	0.0151093	1
Tmem237	0	0.785344	6.54581	18.3243	1.86426e-05	0.02385	-0.314495	6.21295	1.84845	0.173966	1
Tsix	0	-0.626166	7.90036	29.0676	6.99997e-08	0.000143285	-0.950828	7.82866	44.9668	2.01089e-11	1.23485e-07
Tubb2a	0	-2.49464	5.81372	110.939	6.22659e-26	6.3727e-22	-0.0973502	9.86537	1.56337	0.211175	1
Xist	0	-7.29242	9.97556	3386.61	0	0	-6.31113	9.79393	2293.91	0	0
4933412L11Rik	1	2.00982	5.55069	73.3137	1.11594e-17	8.69434e-14	0.304373	5.08066	1.38972	0.238455	1
Agbl3	1	-0.818368	6.28843	20.6687	5.4642e-06	0.0103108	0.0918966	6.96737	0.414552	0.519669	1
Arl5b	1	1.11202	5.09216	18.9424	1.34809e-05	0.0229954	0.269644	5.98108	1.96677	0.160793	1
Chdh	1	2.39727	4.40103	41.4388	1.21978e-10	5.35032e-07	-0.373109	5.41517	2.56352	0.109357	1
D830024N08Rik	1	0.817541	6.69107	27.4555	1.60962e-07	0.000437783	0.12452	7.79463	1.2553	0.262545	1
Dctn1	1	-0.152761	7.43139	1.49971	0.220719	1	-0.488887	7.98703	20.0913	7.38832e-06	0.0283564
Dmtf1	1	-0.778935	6.48491	21.1177	4.32267e-06	0.00884822	-0.0158565	5.59336	0.00539114	0.941468	1
Donson	1	-0.693393	7.406	29.2336	6.42533e-08	0.000219204	-0.190331	6.25083	1.13213	0.287324	1
Dpp6	1	-0.336735	9.09264	17.3314	3.14121e-05	0.0438398	0.14792	8.69017	2.84931	0.091415	1
Fes	1	-5.3797	3.52961	28.124	1.13943e-07	0.00034985	6.32484e-17	2.27762	0	1	1
Gm26538	1	-1.31557	5.04387	21.9451	2.80795e-06	0.00615823	0.680044	3.39483	1.04977	0.305562	1
Gm26699	1	1.2263	5.41106	27.3374	1.71098e-07	0.000437783	-0.197197	6.52465	1.41567	0.23412	1
Gm43320	1	-0.212935	5.25708	0.792887	0.37323	1	1.3881	6.99784	80.5791	2.82334e-19	2.8896e-15
Gm44435	1	-1.04859	5.36785	18.4426	1.75208e-05	0.0283137	-0.000417204	8.00934	1.57876e-05	0.99683	1
Gtf2a2	1	1.10326	7.94579	102.709	3.9505e-24	6.06481e-20	0.0740177	7.32337	0.337523	0.561263	1
Gusb	1	-1.39345	5.05947	25.3417	4.80758e-07	0.00113548	0.222045	6.60823	1.94612	0.163008	1
Jpx	1	-3.99806	4.24684	56.0347	7.15814e-14	3.85351e-10	-3.05128	4.05026	34.1481	5.11752e-09	3.32768e-05
Mastl	1	2.43196	3.78225	20.5849	5.70881e-06	0.0103108	0.0218064	4.93471	0.00632194	0.936627	1
Nfic	1	0.066144	6.44579	0.158468	0.690572	1	-0.945957	8.82891	112.23	3.24833e-26	4.98683e-22
Nosip	1	0.0852904	7.85368	0.603831	0.437121	1	-0.586542	8.27369	34.0367	5.41897e-09	3.32768e-05
Plpp4	1	-0.928604	5.6305	17.3545	3.10338e-05	0.0438398	-0.0208749	6.21361	0.0134273	0.907751	1
Snhg11	1	0.0672154	13.8471	3.35841	0.0668645	1	0.179507	13.5178	23.4534	1.28101e-06	0.00561889
Srrd	1	-1.55111	6.48341	73.2844	1.13266e-17	8.69434e-14	-0.10824	5.50869	0.236076	0.627055	1
Tcf7l2	1	0.575078	7.10392	17.5506	2.79914e-05	0.0429724	0.203256	7.2784	2.42294	0.119572	1
Tsix	1	-0.675844	7.76031	34.0794	5.30157e-09	2.03474e-05	-0.585724	7.60306	24.0112	9.58743e-07	0.00490621
Tubb2a	1	-1.67945	5.96609	55.935	7.53031e-14	3.85351e-10	0.0461655	9.92197	0.487282	0.485143	1
Xist	1	-5.34088	9.61797	2311.71	0	0	-5.55774	9.39163	2203.6	0	0
4933412L11Rik	2	1.84681	5.45688	45.4849	1.54364e-11	7.89934e-08	-0.0339671	4.87759	0.0162258	0.898639	1
D830024N08Rik	2	1.04041	6.98789	43.756	3.73191e-11	1.63692e-07	0.12994	7.72962	1.34516	0.246128	1
Dctn1	2	0.0391449	7.58104	0.0927099	0.76076	1	-0.505466	8.02122	22.6872	1.90804e-06	0.00532585
Dlgap1	2	0.37542	9.46713	21.12	4.31749e-06	0.00946888	0.131567	9.61082	3.24254	0.0717514	1
Gm26699	2	1.80956	5.81496	53.3227	2.84384e-13	2.18293e-09	0.0617826	6.46755	0.148694	0.699787	1
Gm38217	2	1.57672	4.65762	19.7385	8.88583e-06	0.0181887	0.120304	3.1164	0.0224476	0.880903	1
Gm38315	2	1.48942	4.88634	21.4718	3.59372e-06	0.00848781	0.645728	4.44955	4.02124	0.0449324	1
Gnrh1	2	0.510481	3.42143	0.435334	0.509384	1	1.84071	4.84939	32.1761	1.41061e-08	7.21858e-05
Gtf2a2	2	0.694486	7.91666	34.1499	5.11284e-09	1.74428e-05	-0.13532	7.23198	1.10539	0.293088	1
Hexim2	2	0.190517	5.10734	0.47287	0.491671	1	1.46122	4.83055	26.192	3.09466e-07	0.00118773
Insig1	2	0.236288	5.61161	1.00923	0.31509	1	-0.693819	7.12318	26.3285	2.88361e-07	0.00118773
Jpx	2	-2.96726	3.84101	21.6615	3.25532e-06	0.00832928	-4.26616	3.84118	46.3089	1.0137e-11	6.22494e-08
Mastl	2	3.68645	3.84581	25.5208	4.38137e-07	0.00134525	0.401482	4.48112	1.6413	0.200149	1
Nell2	2	0.0128061	7.56327	0.00991072	0.9207	1	-0.506517	7.78541	20.6845	5.41946e-06	0.0138666
Nfic	2	-0.335258	6.32463	3.24458	0.0716621	1	-0.716076	8.44329	52.769	3.76946e-13	2.89344e-09
Nosip	2	0.217925	7.91821	3.46792	0.0625719	1	-0.493259	8.19776	23.8414	1.04715e-06	0.00357242
Pvalb	2	0.187551	9.41023	5.01892	0.0430741	1	-0.359551	9.48173	22.7259	1.87005e-06	0.00532585
Sh3bgrl	2	0.599189	7.67903	22.3778	2.24145e-06	0.00625649	0.128309	6.91741	0.835158	0.360787	1
Snhg11	2	0.227996	13.9353	39.4853	3.31427e-10	1.27202e-06	0.305975	13.6701	62.5545	2.60876e-15	2.66998e-11
Srrd	2	-1.32184	6.54112	53.8718	2.1506e-13	2.18293e-09	0.410029	5.52428	3.59861	0.0578299	1
Tsix	2	-2.0343	6.33568	101.313	7.99045e-24	1.22669e-19	-3.06742	5.84191	160.827	7.78899e-37	1.19577e-32
Tubb2a	2	-1.75545	5.68854	47.659	5.09157e-12	3.12663e-08	-0.115718	9.83237	2.79808	0.0943791	1
Xist	2	-4.8667	9.5256	1957.37	0	0	-5.99015	9.32668	2249.86	0	0
4933412L11Rik	3	2.23556	5.37346	64.1873	1.1392e-15	9.48947e-12	0.910506	5.02638	9.29875	0.0022935	1
Chdh	3	1.74535	4.2828	18.3855	1.80535e-05	0.0395939	-0.733866	5.01124	5.95164	0.0147047	1
Ecel1	3	-0.836281	6.66814	20.206	6.95836e-06	0.0194227	-0.183626	6.80321	1.21084	0.271167	1
Fam159b	3	-0.469911	4.98223	2.24104	0.134393	1	1.03201	5.7756	19.2018	1.1768e-05	0.0451655
Gm26538	3	-1.58466	5.18051	22.4106	2.20347e-06	0.00751728	-0.662002	3.57705	0.90947	0.340257	1
Gm43320	3	0.10664	4.46059	0.0817479	0.774943	1	1.09756	6.10389	24.8324	6.26047e-07	0.00320369
Gm45464	3	1.98825	4.05368	17.9314	2.29142e-05	0.0469038	0.477885	2.82978	0.106058	0.744678	1
Gtf2a2	3	0.895041	8.02305	54.2865	1.74153e-13	1.06944e-09	-0.206792	7.19021	1.92557	0.165246	1
Jpx	3	-1.84249	4.2488	14.2852	0.000157151	0.193006	-3.04736	3.92499	23.0296	1.59675e-06	0.00700378
Lcp1	3	2.39553	4.09438	25.7063	3.97994e-07	0.00174572	1.06919	3.73316	2.98703	0.0839362	1
Mastl	3	3.9035	3.47878	21.4249	3.68267e-06	0.0113073	0.0657943	4.76808	0.0395876	0.842289	1
Naip6	3	-3.3088	3.85475	19.2462	1.14973e-05	0.0271548	1.58529	2.52027	0.656884	0.417663	1
Nfic	3	0.280739	6.11179	1.81097	0.178393	1	-1.15612	8.46195	107.116	4.27817e-25	6.56784e-21
Nosip	3	-0.0875062	7.95069	0.493012	0.482588	1	-0.808723	8.24028	48.3435	3.59154e-12	3.67582e-08
Srrd	3	-1.64622	6.61938	64.0262	1.23625e-15	9.48947e-12	-0.235005	5.43466	0.861389	0.353352	1
Tac1	3	-0.813619	8.45125	52.634	4.03756e-13	2.06615e-09	-0.600243	8.34371	27.6594	1.44861e-07	0.000889563
Tsix	3	-0.705053	7.6311	25.1833	5.21888e-07	0.002003	-0.934293	7.20911	37.935	7.33217e-10	5.62818e-06
Tspan33	3	-1.0813	5.87483	19.8697	8.29627e-06	0.0212274	-0.216189	5.65501	0.834733	0.360909	1
Tubb2a	3	-2.30626	6.44182	82.0675	1.33004e-19	2.04188e-15	0.083876	10.0099	1.26	0.261653	1
Xist	3	-4.50837	9.59529	1373.5	2.56674e-299	7.88091e-295	-4.90564	9.25014	1414.47	3.85995e-308	1.18516e-303
Arl5b	4	1.79416	5.29473	31.7354	1.76984e-08	4.1801e-05	0.281405	5.94148	1.50468	0.219955	1
Calcr	4	0.415403	5.66213	2.50954	0.113161	1	1.3508	5.38405	21.9179	2.84809e-06	0.0124925
Chdh	4	1.821	5.259	32.2248	1.37576e-08	3.5201e-05	-0.520047	5.92225	4.99732	0.0253881	1
D830024N08Rik	4	1.18659	6.98189	41.5244	1.1675e-10	3.5847e-07	0.174198	7.99956	2.05334	0.151875	1
Gm26538	4	-1.43387	5.06419	18.8034	1.44998e-05	0.0296801	0.400389	3.55418	0.205743	0.650125	1
Gm26699	4	1.86147	6.21122	56.9913	4.40151e-14	1.6893e-10	0.0837315	6.84489	0.237697	0.625875	1
Gtf2a2	4	1.22577	8.21894	84.7849	3.36657e-20	2.06734e-16	0.061535	7.33496	0.175548	0.675228	1
Igha	4	-8.82247	6.62542	234.648	6.3231e-53	4.85361e-49	-4.28983e-17	2.74719	0	1	1
Iglc2	4	-9.42631	7.19509	302.802	9.38608e-68	9.60634e-64	-4.28983e-17	2.74719	0	1	1
Iglc4	4	-8.43071	7.4015	321.352	8.70351e-72	1.33616e-67	-4.28983e-17	2.74719	0	1	1
Jchain	4	-3.94947	4.86688	59.8337	1.03842e-14	4.55481e-11	0.0191923	3.06971	0.000132805	0.990805	1
Jpx	4	-2.58635	4.17961	18.2551	1.93325e-05	0.037099	-2.33164	3.99098	12.171	0.00048552	0.532407
Nfic	4	0.111728	6.31051	0.270598	0.602932	1	-0.852602	8.85954	68.8012	1.09775e-16	1.68526e-12
Ptgds	4	-0.0233558	9.37906	0.0538667	0.816467	1	-0.580775	9.71352	46.9543	7.2935e-12	7.46466e-08
Snhg11	4	0.0249569	13.8244	0.19241	0.660919	1	0.241697	13.4558	37.8562	7.63416e-10	4.68799e-06
Srrd	4	-1.48172	6.52943	47.9462	4.39797e-12	1.50039e-08	-0.111738	5.40119	0.163042	0.686372	1
Tac1	4	0.770001	7.2722	21.3986	3.73349e-06	0.00818809	-0.202813	7.61526	2.23397	0.135008	1
Tmod2	4	-0.0697057	7.51829	0.208301	0.648103	1	0.715876	8.02117	34.3101	4.70902e-09	2.40976e-05
Tsix	4	-0.854392	7.83673	35.1556	3.05039e-09	8.51448e-06	-0.922943	7.53299	42.1102	8.65318e-11	6.64218e-07
Tubb2a	4	-1.96857	6.22996	62.4693	2.72413e-15	1.39403e-11	-0.148514	9.95677	3.92433	0.047594	1
Xist	4	-4.86437	9.96966	1453.15	1.81390312608115e-316	5.56940815831957e-312	-5.4217	9.77121	2078.13	0	0
1700088E04Rik	5	0.895083	6.10631	17.1805	3.40096e-05	0.0336849	0.206491	5.55268	0.614634	0.43305	1
2610306M01Rik	5	1.12753	5.42677	16.6037	4.60854e-05	0.0382434	-0.0620224	5.45217	0.0528961	0.818099	1
4933412L11Rik	5	2.09281	5.8974	65.5271	5.77354e-16	4.43177e-12	0.152262	5.35291	0.288909	0.590921	1
Adra2a	5	-0.729791	6.68907	16.9557	3.82829e-05	0.0350585	0.045996	5.83846	0.0366447	0.84819	1
Ap1s2	5	-0.652807	7.07975	16.8206	4.11056e-05	0.0350585	-0.337322	7.11192	4.51673	0.0335666	1
C130073E24Rik	5	-0.337884	8.76739	9.70638	0.00183663	0.466049	-0.570122	8.82744	31.8547	1.66439e-08	5.11034e-05
Cald1	5	0.986855	6.34233	23.5615	1.21105e-06	0.00177067	-0.125979	5.40896	0.211157	0.645863	1
Col11a1	5	-0.444171	7.16498	8.2602	0.00405293	0.711092	-0.932519	6.82757	27.9835	1.22523e-07	0.000341995
Col25a1	5	1.04012	6.41882	27.1806	1.85552e-07	0.000342468	0.961255	6.61393	24.0641	9.32771e-07	0.00190932
D830024N08Rik	5	0.953457	7.03411	32.1727	1.41312e-08	2.95469e-05	0.350883	8.06409	8.08872	0.00445474	0.93884
Dctn1	5	-0.00222878	7.60789	0.000271182	0.986861	1	-0.526237	8.28303	19.5224	9.94965e-06	0.0122198
Dlgap1	5	0.526241	8.05914	17.6068	2.71771e-05	0.0278148	0.593829	8.13927	23.594	1.19075e-06	0.00228505
Dlk1	5	-0.713664	7.07964	20.3402	6.48727e-06	0.00829938	-0.23536	6.79462	1.75661	0.18505	1
Dync2h1	5	0.0374231	6.28331	0.0357108	0.850114	1	0.728587	7.18488	20.2344	6.85606e-06	0.00877118
Ecel1	5	0.291363	8.6898	7.06901	0.00784367	0.976588	0.616593	8.2955	27.4151	1.64363e-07	0.000420549
Elmo1	5	-0.057362	7.30183	0.146545	0.701859	1	0.715478	7.40912	22.3377	2.28872e-06	0.0041337
Epha5	5	-0.189312	10.004	4.55203	0.0328814	1	-0.322023	10.3567	19.2806	1.12923e-05	0.0133353
Fbln2	5	-2.65679	4.03285	21.4421	3.64979e-06	0.00487231	0.76782	4.62149	3.62712	0.0568468	1
Fes	5	-3.21155	3.73025	18.6407	1.57914e-05	0.0179577	-0.548278	2.94704	0.0905578	0.76347	1
Gal	5	-0.715767	9.60287	56.1507	6.74805e-14	3.4532e-10	-0.682846	9.03954	47.897	4.50964e-12	3.4616e-08
Gm20754	5	1.53993	5.2357	25.9619	3.48639e-07	0.0005634	0.793691	5.78235	9.87266	0.00167785	0.54805
Gm24336	5	1.51985	4.70341	16.3573	5.24801e-05	0.0415744	0.127086	6.22339	0.360676	0.548132	1
Gm26538	5	-1.41806	4.74832	16.0397	6.20587e-05	0.0476362	0.0269547	3.75004	0.0013835	0.970329	1
Gm26699	5	1.1161	5.75968	19.4583	1.02889e-05	0.0126364	-0.115312	6.95361	0.472545	0.49182	1
Gm34066	5	-1.7638	4.88317	26.468	2.68262e-07	0.000457595	-1.42603	5.95801	35.9282	2.05178e-09	8.9997e-06
Gm42635	5	-0.0935544	6.43677	0.24273	0.622242	1	1.06603	6.08428	20.5679	5.75961e-06	0.0082545
Gm43320	5	-0.245204	5.29617	0.800728	0.370877	1	0.819459	6.96402	20.5171	5.9145e-06	0.0082545
Gm44199	5	3.98034	3.61887	17.8755	2.35976e-05	0.0249842	0.378665	3.59937	0.200607	0.654232	1
Gm44438	5	0.925544	6.13521	18.4392	1.75521e-05	0.0192472	0.0974832	5.81492	0.162702	0.686682	1
Grp	5	-0.993898	6.32524	24.9596	5.86089e-07	0.000899764	-0.381222	5.67919	2.29478	0.129812	1
Gtf2a2	5	1.24329	8.2488	99.1679	2.3579e-23	2.41323e-19	0.102009	7.36162	0.471035	0.492512	1
Hexim2	5	-0.0839952	5.2529	0.0900629	0.764098	1	1.63361	5.29242	25.9234	3.55658e-07	0.00084001
Hmgn3	5	0.462229	8.6089	16.9272	3.88611e-05	0.0350585	0.250155	8.23084	4.50738	0.0337506	1
Itm2b	5	-0.0646593	10.1325	0.54528	0.460254	1	-0.332478	10.0988	18.3741	1.81618e-05	0.0206533
Jpx	5	-3.0909	4.49369	45.7263	1.36467e-11	4.19008e-08	-3.18483	4.35691	37.8619	7.61189e-10	3.89526e-06
Lcp1	5	2.4029	4.25236	22.1498	2.524e-06	0.00352259	0.0437119	3.63188	0.00294834	0.956697	1
Lrp1b	5	0.625632	9.72069	44.6401	2.37595e-11	6.63192e-08	0.482684	9.7372	32.9798	9.32954e-09	3.18283e-05
Mastl	5	3.00054	4.31948	32.6699	1.09417e-08	2.58426e-05	0.362434	5.13487	1.37309	0.241283	1
Nfic	5	0.144811	6.26933	0.525207	0.46863	1	-1.09106	8.78761	103.949	2.11306e-24	3.24396e-20
Npy1r	5	-0.975974	5.96623	19.3732	1.07579e-05	0.0127043	-0.208736	5.63688	0.671872	0.412401	1
Nrip1	5	0.785804	7.66704	32.1314	1.44347e-08	2.95469e-05	0.971525	7.59243	44.8054	2.18366e-11	1.34094e-07
Nrxn3	5	0.0358319	9.96774	0.163309	0.686128	1	0.458919	10.1317	35.2862	2.8525e-09	1.09479e-05
Ntng1	5	0.30904	9.12402	9.25238	0.00235229	0.512233	0.4286	9.1485	20.3407	6.48542e-06	0.00865775
Penk	5	-0.290346	8.39146	6.31632	0.0119642	1	-0.414796	9.3117	20.8883	4.87248e-06	0.00748022
Pla2g7	5	-0.881425	6.07836	16.8903	3.96244e-05	0.0350585	-0.230888	6.74543	1.66969	0.196302	1
Serpine2	5	-0.855177	7.49823	35.5436	2.49944e-09	6.39524e-06	-0.649992	7.51129	21.0107	4.57091e-06	0.00738659
Sgcd	5	1.1099	7.46843	55.1444	1.1257e-13	4.93766e-10	0.694402	7.42555	21.5057	3.53061e-06	0.00602243
Slc10a4	5	1.2621	5.12124	16.8439	4.06054e-05	0.0350585	0.475434	3.91825	0.548812	0.458805	1
Snhg11	5	0.300844	14.066	27.1387	1.89615e-07	0.000342468	0.355207	13.782	65.911	4.75203e-16	4.86355e-12
Srrd	5	-1.41967	6.36957	50.5539	1.1644e-12	4.46896e-09	0.216124	5.47068	0.628234	0.428005	1
Tac1	5	-1.13113	8.78523	108.476	2.15523e-25	3.30871e-21	-0.508757	8.83425	24.1796	8.78468e-07	0.00190932
Tac2	5	-0.617802	10.7262	57.2203	3.91781e-14	2.40585e-10	-0.193427	10.2888	6.55496	0.0104602	1
Tsix	5	-0.489359	8.17697	16.3455	5.28075e-05	0.0415744	-0.470788	8.17753	15.7613	7.18902e-05	0.0735772
Tubb2a	5	-1.72526	5.83123	46.1087	1.12273e-11	3.83025e-08	-0.201336	9.73316	5.84635	0.0156106	1
Xist	5	-5.29271	9.7839	1675.51	0	0	-6.24586	9.56841	2051.74	0	0
D830024N08Rik	6	1.38809	6.92448	26.3624	2.83347e-07	0.00144998	0.130728	7.96407	0.691861	0.405534	1
Dctn1	6	0.0441424	7.67048	0.0476532	0.827199	1	-0.752301	7.91652	22.3183	2.31197e-06	0.0141973
Gm26699	6	2.61598	6.8327	69.1324	9.28089e-17	1.4248e-12	0.241961	6.91461	1.30248	0.253763	1
Grid2ip	6	0.966825	8.70171	27.6126	1.4841e-07	0.000911357	-0.444804	5.05571	1.20209	0.272906	1
Gtf2a2	6	1.08397	8.33348	35.0427	3.23237e-09	3.30822e-05	0.221436	7.44553	1.49206	0.221899	1
H2-T24	6	-0.951997	4.11433	0.934452	0.33371	1	1.18584	6.52083	20.9267	4.77574e-06	0.0209478
Jpx	6	-2.4446	4.71641	15.889	6.72006e-05	0.163012	-5.35783	4.47455	31.6483	1.85097e-08	0.00018944
Nfic	6	0.0708394	6.13003	0.0510128	0.82131	1	-0.631919	8.73937	22.4924	2.11169e-06	0.0141973
Nosip	6	0.415984	8.30796	5.4252	0.0198495	1	-0.617412	8.54693	21.1167	4.32479e-06	0.0209478
Nts	6	-1.07201	7.47166	25.5048	4.41781e-07	0.00193778	-0.159963	7.55585	0.819292	0.365389	1
Srrd	6	-1.26263	6.53365	20.4537	6.11354e-06	0.0234638	-0.0378122	5.75462	0.0153622	0.901359	1
Stk38	6	-1.14032	6.74734	19.296	1.12016e-05	0.038215	0.335012	6.52542	1.91983	0.165877	1
Tsix	6	-1.09481	7.63244	29.1522	6.70085e-08	0.000514357	-1.91338	7.57614	102.68	4.00864e-24	6.15407e-20
Xist	6	-6.64853	10.1244	1083.48	8.65277e-237	2.65675e-232	-6.05589	10.1276	1699.32	0	0
4933412L11Rik	7	2.26511	5.77881	64.6878	8.83744e-16	9.04483e-12	0.291579	5.22644	0.678062	0.410256	1
Chdh	7	1.94816	4.76054	23.3281	1.36721e-06	0.00349824	-0.0835772	5.49905	0.0701157	0.791169	1
D830024N08Rik	7	0.858619	6.87763	21.9133	2.85498e-06	0.00674303	0.174831	7.94031	1.50336	0.220158	1
Dctn1	7	-0.158232	7.65837	1.18471	0.276401	1	-0.770987	8.11812	30.9028	2.71725e-08	0.000208576
Fes	7	-3.64755	4.21053	26.1945	3.09078e-07	0.000948992	0.0822655	3.40196	0.00132726	0.970938	1
Gm26538	7	-2.33024	5.31552	39.1234	3.98893e-10	1.74966e-06	-0.211414	3.76273	0.0348911	0.851824	1
Gm26699	7	2.08373	5.82345	57.3304	3.70466e-14	2.84369e-10	0.227852	6.82912	1.27683	0.258491	1
Gm43320	7	0.248767	5.54023	0.787855	0.374751	1	1.18167	7.58977	44.476	2.5836e-11	2.64423e-07
Gm45464	7	2.50877	4.15399	17.9364	2.28538e-05	0.0467803	0.555375	3.59577	0.152624	0.696041	1
Gtf2a2	7	1.15274	8.20596	84.1929	4.54105e-20	6.97142e-16	-0.150182	7.3141	0.760413	0.383201	1
Mastl	7	4.83201	4.17998	42.6541	6.55294e-11	3.35336e-07	0.759926	5.05456	3.67847	0.0551214	1
Naip6	7	-3.31366	4.11313	19.0918	1.24659e-05	0.0273396	0.260518	3.45338	0.0197026	0.888371	1
Nfic	7	-0.384408	6.39897	3.27473	0.0703563	1	-0.980595	8.79703	70.6139	4.38094e-17	6.72562e-13
Sh3bgrl	7	0.836433	7.4853	30.0634	4.18801e-08	0.000142876	-0.15692	6.17608	0.397716	0.528272	1
Snhg11	7	0.110348	14.0869	7.37117	0.00662851	1	0.20835	13.6342	21.5913	3.3765e-06	0.0207344
Srrd	7	-1.59462	6.67701	55.8193	7.98653e-14	4.90437e-10	-0.282575	5.64661	0.889501	0.345614	1
Tubb2a	7	-1.57654	6.05129	33.3001	7.91294e-09	3.03699e-05	-0.0401481	9.89743	0.225162	0.635135	1
Vgf	7	-0.758952	7.50604	24.2497	8.47086e-07	0.00236445	-0.26496	7.47321	2.59834	0.106977	1
Xist	7	-5.57745	9.77565	1706.69	0	0	-5.8386	9.51442	1509.96	0	0
AC121094.1	8	-6.38482	4.29092	20.1205	7.28433e-06	0.0279573	-0.0617806	5.10971	0.00669925	0.934767	1
AC147615.2	8	-2.54476	6.46046	25.4138	4.63908e-07	0.00356096	-0.152907	6.87003	0.150713	0.697856	1
Crcp	8	3.01571	5.12561	24.1436	8.96426e-07	0.00550477	-0.0523754	4.36112	0.0024945	0.960166	1
Foxn2	8	0.0400574	4.11447	0.00236231	0.961235	1	3.51524	6.39572	43.18	5.01942e-11	7.70581e-07
Gm20536	8	3.82213	7.56739	57.2583	3.87482e-14	5.94863e-10	1.05684	3.81305	0.514843	0.473052	1
Gm26699	8	-2.37437	6.17242	21.0955	4.37815e-06	0.0224045	-0.635104	6.60774	2.41245	0.120377	1
Gm44435	8	-2.24418	6.35684	20.1707	7.09596e-06	0.0279573	0.215789	8.31885	0.432553	0.510741	1
Tac2	8	0.86428	9.12537	3.49239	0.0616563	1	-1.52107	8.55174	22.7663	1.83226e-06	0.0187525
Tubb2a	8	3.86273	6.72203	48.23	3.8279e-12	3.91773e-08	-0.0978647	10.4577	0.176678	0.674245	1
Xist	8	-6.99964	9.26927	101.266	8.39307e-24	2.57701e-19	-5.06414	9.11018	155.653	1.07758e-35	3.30861e-31
2810013P06Rik	9	0.128788	5.87029	0.198915	0.655599	1	1.09027	6.54574	17.6006	2.72649e-05	0.0492437
Adgrb3	9	0.523242	8.76055	19.9223	8.07095e-06	0.0123905	0.196124	9.40015	3.38739	0.0656987	1
Arhgap6	9	1.24222	6.61303	27.0137	2.02275e-07	0.000595235	0.48686	6.54263	3.85017	0.0497428	1
Arpp21	9	0.838212	7.12966	18.4189	1.77401e-05	0.0202084	0.617084	7.1773	9.2789	0.00231848	0.879347
Brap	9	0.890557	6.96437	18.4156	1.77705e-05	0.0202084	0.304809	6.09735	1.15367	0.282784	1
Brinp2	9	0.602222	8.71212	25.3851	4.70059e-07	0.00120272	0.926487	7.94953	31.1414	2.40308e-08	7.37841e-05
C1ql1	9	2.14733	4.9242	19.2353	1.15635e-05	0.0154694	0.596317	4.77248	1.24129	0.265224	1
Cck	9	0.740438	8.60218	35.567	2.46961e-09	1.08324e-05	1.21005	8.78911	82.2336	1.22286e-19	7.50931e-16
Crhbp	9	-0.617561	7.42762	13.221	0.000276926	0.170055	-1.02613	7.80734	40.3069	2.17642e-10	7.42497e-07
Crhr2	9	1.23135	6.26383	20.5064	5.94782e-06	0.00961167	0.582746	6.47866	5.24521	0.0220086	1
D830024N08Rik	9	1.13178	6.97425	27.6509	1.45501e-07	0.000496386	0.283057	7.86048	3.00389	0.083067	1
Dcn	9	3.21316	7.15675	156.784	5.94307e-36	9.1238e-32	3.34104	7.78134	205.599	1.34333e-46	2.06229e-42
Dock4	9	1.23807	6.20982	19.2312	1.1588e-05	0.0154694	1.09189	6.44036	16.3762	5.19598e-05	0.0725169
Ecel1	9	1.48344	7.79523	79.3867	5.16091e-19	3.96152e-15	1.74301	7.39029	65.41	6.12673e-16	2.68736e-12
Egr1	9	0.974337	6.903	21.3869	3.75636e-06	0.00640751	0.0285698	5.88519	0.00889557	0.924858	1
Etl4	9	1.41051	5.84115	19.5211	9.95647e-06	0.0145573	1.35582	5.17546	8.79292	0.00302448	0.977511
Fstl5	9	-0.566793	8.0672	16.8056	4.14327e-05	0.041659	-0.0948024	8.42516	0.488067	0.484792	1
Gm20536	9	0.830177	7.0786	17.2984	3.19636e-05	0.0350504	0.763461	4.8509	1.95126	0.162453	1
Gm45025	9	1.26843	4.74834	6.00887	0.0142352	1	1.22825	6.34261	18.8543	1.41186e-05	0.0309642
Gtf2a2	9	0.954582	8.02714	41.9754	9.27082e-11	4.74419e-07	-0.101545	7.34017	0.299177	0.584399	1
Lrp1b	9	0.531082	9.04692	23.8898	1.02116e-06	0.00223954	0.538711	9.21963	22.7332	1.86292e-06	0.00476659
Mapk15	9	1.76443	5.20669	18.6406	1.57925e-05	0.0193958	0.217974	6.27025	0.669012	0.413398	1
Meg3	9	0.246874	13.2555	19.1486	1.21003e-05	0.0154803	0.134798	13.1295	5.46612	0.01939	1
Nfic	9	0.371097	5.77371	1.49998	0.220676	1	-1.29526	8.12474	75.4181	3.84525e-18	1.96774e-14
Npy	9	-0.939622	6.36517	14.1338	0.000170321	0.129887	-1.48992	5.97199	27.6162	1.48131e-07	0.000413474
Pcdh9	9	-0.312496	8.7413	7.32953	0.00678382	1	-0.41263	9.75212	18.0441	2.15968e-05	0.0414443
Prmt9	9	0.72392	7.89935	22.7837	1.81463e-06	0.00348228	0.247773	4.92521	0.277309	0.598471	1
Prtn3	9	1.36304	5.71729	17.2277	3.31749e-05	0.0351242	0.833473	6.18791	8.13719	0.00433722	1
Sgcd	9	0.97516	6.95203	21.9615	2.78406e-06	0.00502835	0.619563	6.73393	6.87908	0.00872189	1
Sh3bgrl	9	0.76181	7.75708	22.9195	1.69089e-06	0.00346114	-0.157508	6.87191	0.536946	0.463702	1
Snhg11	9	0.412417	13.633	56.3984	5.94963e-14	3.65355e-10	0.540099	13.4876	93.6527	3.81565e-22	2.9289e-18
Sorbs2	9	0.635381	7.80869	16.777	4.20606e-05	0.041659	0.154689	7.75102	0.866621	0.351894	1
Srrd	9	-1.39124	6.25006	29.2816	6.26796e-08	0.000240564	-0.00380674	5.52561	0.000135905	0.990699	1
Sst	9	-0.312966	9.05209	8.19925	0.00419135	0.814224	-1.30406	9.54839	154.608	1.77392e-35	1.81555e-31
Tac1	9	1.79121	8.33901	151.106	1.03164e-34	1.05585e-30	0.597393	8.73257	21.1919	4.15856e-06	0.00982187
Tmtc1	9	-0.0870657	6.04862	0.102045	0.749389	1	1.34393	6.10672	18.0865	2.11213e-05	0.0414443
Traf3ip1	9	1.17988	6.64016	24.3965	7.84951e-07	0.00185393	0.733465	6.73836	9.68313	0.00186002	0.782329
Tsix	9	-0.794973	7.73919	26.9116	2.13249e-07	0.000595235	-1.14841	7.5515	44.6643	2.34675e-11	9.00684e-08
Xist	9	-5.31741	9.85523	1704.33	0	0	-6.31195	9.76388	1707.58	0	0
Acta2	10	-0.352921	3.05962	0.0336568	0.854439	1	3.11631	4.60239	27.0019	2.03511e-07	0.000694289
Col4a4	10	0.804791	7.35918	19.9019	8.15906e-06	0.0190389	0.630441	6.5516	7.26952	0.00701421	1
Col9a2	10	-0.997756	3.21346	0.380494	0.53734	1	-2.99252	5.31056	48.3042	3.66416e-12	2.81261e-08
Ctgf	10	-0.465144	4.8753	1.32165	0.250299	1	1.94299	5.30053	27.9365	1.25535e-07	0.000481802
D830024N08Rik	10	1.36927	6.2521	28.8113	7.99304e-08	0.000272687	-0.0325867	7.50329	0.0321662	0.857664	1
Gm26699	10	2.1813	6.25509	64.0217	1.24116e-15	1.27029e-11	-0.0997891	6.9283	0.226388	0.634216	1
Gm32647	10	-0.815429	7.19068	18.8402	1.42251e-05	0.0291178	0.152838	6.07977	0.335441	0.562474	1
Gm43320	10	0.0202824	6.8764	0.00994637	0.920558	1	1.13503	9.13648	49.3682	2.13037e-12	2.18037e-08
Grid2ip	10	0.737967	9.78007	38.4183	5.72758e-10	2.931e-06	-0.127887	6.26952	0.259028	0.610789	1
Gtf2a2	10	0.871131	8.06986	31.4692	2.03068e-08	8.90716e-05	-0.0148088	7.4079	0.00634193	0.936527	1
Jpx	10	-5.47348	4.19332	27.8085	1.34162e-07	0.000411932	-3.41221	4.57514	29.6147	5.27839e-08	0.000231525
Mir99ahg	10	0.678929	8.10727	19.7833	8.68111e-06	0.0190389	0.105121	8.13048	0.432326	0.510851	1
Naip6	10	-3.63665	4.26115	22.7886	1.81039e-06	0.0050533	-1.15009	3.17898	0.371048	0.542435	1
Nfic	10	-0.0638233	6.83918	0.0974062	0.754965	1	-0.636709	9.60316	22.2491	2.39685e-06	0.00669027
Npy	10	-0.0375477	4.2922	0.00439313	0.947154	1	2.21956	5.34306	33.7546	6.26435e-09	3.20568e-05
Pacsin2	10	-1.45563	6.12805	29.8036	4.79016e-08	0.000183846	0.353787	5.89689	1.62924	0.20181	1
Rcsd1	10	1.4211	5.80423	21.3559	3.81839e-06	0.00976999	0.290303	7.37115	2.40474	0.12097	1
Snhg11	10	0.201489	13.7619	6.46842	0.010982	1	0.549288	13.357	38.4012	5.77418e-10	3.54581e-06
Srrd	10	-1.47263	6.59482	39.3108	3.62638e-10	2.78361e-06	-0.120308	5.65951	0.162665	0.686715	1
Tagln	10	0.304402	3.31635	0.0530869	0.817777	1	4.0556	4.37315	26.362	2.83392e-07	0.000870128
Tsix	10	-2.85096	6.97467	146.947	8.42692e-34	1.2937e-29	-3.12378	6.87716	139.198	4.11639e-32	6.31948e-28
Tubb2a	10	-2.00575	5.6928	38.6763	5.01841e-10	2.931e-06	-0.0277508	9.93788	0.0521847	0.819305	1
Xist	10	-5.92367	10.1977	1287.34	1.82691e-280	5.60934e-276	-5.83621	10.1126	1073.46	1.26115e-234	3.87224e-230
4933412L11Rik	11	2.01318	5.80822	44.2435	2.90931e-11	2.97758e-07	0.413888	5.23014	1.49573	0.221331	1
Chdh	11	2.35718	4.95234	30.8187	2.83759e-08	0.000174251	-0.943845	5.63665	10.2163	0.00139231	1
Dctn1	11	-0.0540498	7.71382	0.108094	0.742325	1	-0.677776	8.15866	23.7418	1.10272e-06	0.00564301
Gm20342	11	1.88198	4.96765	23.0589	1.57264e-06	0.00536514	0.634514	4.9792	2.76925	0.0960929	1
Gm26699	11	1.53404	5.62962	23.0814	1.55433e-06	0.00536514	-0.199537	6.83417	1.02808	0.310612	1
Gm43320	11	0.60811	5.15989	3.19398	0.073912	1	1.0342	6.89688	24.7289	6.60575e-07	0.00405646
Gtf2a2	11	0.993912	8.05379	40.7729	1.71475e-10	1.31624e-06	-0.0598774	7.34236	0.124309	0.724408	1
Lrp1b	11	0.198131	9.39326	2.83452	0.0922603	1	0.46068	9.42904	21.6877	3.21116e-06	0.0123244
Nfic	11	-0.110725	6.31936	0.219981	0.639055	1	-1.21431	8.5745	90.1553	2.23182e-21	3.42629e-17
Nosip	11	-0.126449	8.01969	0.687078	0.407161	1	-0.634531	8.33573	23.232	1.43724e-06	0.00630416
Penk	11	-0.571811	9.00758	19.7475	8.84399e-06	0.024686	-0.221983	8.49582	2.95693	0.0855124	1
Pgr	11	0.0621273	5.51315	0.0420805	0.837467	1	1.15687	5.95693	19.144	1.21296e-05	0.0352014
Ptgds	11	0.00847786	9.05251	0.00447963	0.946637	1	-0.481063	9.13726	19.0697	1.26112e-05	0.0352014
Snhg11	11	0.258417	13.9256	10.1568	0.001438	1	0.302583	13.6925	35.9634	2.01509e-09	1.54678e-05
Srrd	11	-1.66998	6.45486	47.0235	7.0406e-12	1.08087e-07	-0.392369	5.44349	1.58965	0.207379	1
Syt5	11	-0.0206148	7.60944	0.0148172	0.903116	1	-0.706066	7.735	20.9293	4.76923e-06	0.0162705
Tsix	11	-0.91602	7.42882	25.8884	3.62158e-07	0.00158853	-1.17058	7.24821	42.0312	9.00986e-11	9.22129e-07
Tubb2a	11	-1.45848	6.2443	26.8977	2.14789e-07	0.00109915	0.00125329	9.9391	0.000194539	0.988872	1
Xist	11	-4.77327	9.6044	880.986	4.71314e-193	1.44712e-188	-5.56659	9.47609	1275.97	2.6411e-278	8.10923e-274
Zfp663	11	1.85237	4.95544	20.4043	6.2734e-06	0.0192619	-1.00266	4.4962	3.91344	0.0479031	1
C1ql3	12	-2.1806	5.93301	25.9455	3.51715e-07	0.00269976	-0.0223889	6.02875	0.00519663	0.942532	1
Chdh	12	2.96039	5.17824	21.401	3.72964e-06	0.0190858	0.000378854	5.83186	1.21652e-05	0.997217	1
Gm26543	12	2.43515	6.15782	34.1539	5.10494e-09	5.22474e-05	-0.494489	5.65367	1.99918	0.157386	1
Gm26699	12	2.46156	6.67868	48.4657	3.37794e-12	5.18582e-08	0.0360655	7.09684	0.0213413	0.883853	1
Jpx	12	-5.44856	4.63686	23.3934	1.32193e-06	0.00811768	-3.00393	4.69876	20.3037	6.61224e-06	0.0676741
Npy	12	-2.16014	5.43024	19.5407	9.85608e-06	0.0336246	-0.318869	4.80772	0.397642	0.52831	1
Nrp2	12	-1.70657	6.29904	20.9768	4.65344e-06	0.0204113	0.0247255	7.38776	0.0108384	0.917084	1
Tsix	12	-1.19704	8.02469	20.3707	6.3857e-06	0.0245083	-1.13431	8.05187	29.6674	5.13679e-08	0.0007886
Xist	12	-5.37048	10.4003	255.542	1.83813e-57	5.6438e-53	-5.4847	10.4382	677.811	4.22563e-149	1.29744e-144
Avp	13	0.553569	10.7734	26.1687	3.13232e-07	0.00240437	-0.415724	10.7083	8.99696	0.00270472	1
Gtf2a2	13	1.37267	8.17222	38.5329	5.39756e-10	8.28634e-06	0.0334176	7.6676	0.01598	0.899406	1
Npvf	13	1.91625	4.22403	0.724252	0.394754	1	-6.28609	6.30482	52.21	5.01025e-13	7.69174e-09
Tac1	13	-0.892519	8.90232	27.7831	1.35891e-07	0.0013908	-0.686575	8.80202	12.2448	0.000466677	1
Xist	13	-6.2911	9.61487	659.282	4.34514e-145	1.33413e-140	-5.9432	9.33267	382.957	3.59182e-85	1.10283e-80
4933412L11Rik	14	1.46969	6.11823	24.0559	9.36726e-07	0.00405368	0.125684	5.54982	0.116334	0.733045	1
Col9a2	14	0.428198	3.88585	0.165677	0.683983	1	-2.1221	5.84744	28.7587	8.20984e-08	0.000840249
D830024N08Rik	14	1.28299	6.95589	30.1538	3.99743e-08	0.000306843	0.0305179	7.99811	0.0328637	0.856145	1
D8Ertd738e	14	1.08384	6.64245	18.839	1.42317e-05	0.0429617	0.405152	7.10231	3.53504	0.0600869	1
Gm26543	14	1.47361	6.04861	23.8248	1.0562e-06	0.00405368	0.567211	5.36019	2.0163	0.15562	1
Gm26699	14	2.18825	6.35099	54.7527	1.37385e-13	2.10914e-09	0.0535971	7.18543	0.0642127	0.799958	1
Gm43320	14	-0.165633	6.26202	0.368679	0.543726	1	0.892752	8.29663	25.6619	4.07259e-07	0.00312612
Grid2ip	14	1.04424	9.07466	43.1855	4.99463e-11	5.11184e-07	0.271668	5.93462	0.744328	0.388279	1
Gtf2a2	14	0.934382	8.11317	27.4733	1.59489e-07	0.000855811	0.11861	7.48727	0.379708	0.53776	1
Nfic	14	-0.179732	6.77638	0.586676	0.443709	1	-0.799963	9.33177	34.3753	4.55377e-09	6.99095e-05
Srrd	14	-1.45481	6.31175	27.3815	1.67238e-07	0.000855811	0.267145	5.71928	0.607913	0.435576	1
Tsix	14	-0.773954	8.08345	18.846	1.41801e-05	0.0429617	-0.85242	8.08622	24.681	6.77211e-07	0.00415862
Tubb2a	14	-1.23638	6.32809	18.6896	1.53914e-05	0.0429617	-0.150204	10.1142	1.92235	0.1656	1
Xist	14	-5.61527	10.1961	777.444	1.15721e-170	3.55311e-166	-5.56047	10.0153	1017.85	1.27653e-222	3.91946e-218
4933412L11Rik	15	2.06117	5.60569	25.7895	3.81202e-07	0.00234089	0.997838	5.08792	2.9769	0.0844631	1
Avp	15	-0.377608	12.5864	31.2703	2.2487e-08	0.000230147	0.151594	12.0286	4.54354	0.0330448	1
Cck	15	-0.0235664	7.87662	0.0187553	0.891071	1	0.681575	9.01441	25.2865	4.9472e-07	0.00189874
Gnrh1	15	3.2334	5.1995	28.6688	8.59975e-08	0.000660117	-5.62039	8.08584	307.083	1.10065e-68	1.68972e-64
Gtf2a2	15	0.791287	7.84384	20.7503	5.23636e-06	0.0200972	-0.273129	7.06842	1.32314	0.25003	1
Jpx	15	-3.68323	4.79098	16.9531	3.83354e-05	0.107005	-3.51722	5.31734	35.5302	2.51674e-09	1.2879e-05
Nfic	15	0.394045	5.87243	1.31392	0.251687	1	-1.29273	8.52179	68.8089	1.09345e-16	6.71463e-13
Oxt	15	-0.706687	8.65482	23.7096	1.12133e-06	0.00573823	0.110767	8.84739	0.636548	0.424965	1
Pde10a	15	-0.0814884	7.20779	0.141511	0.706784	1	0.751596	8.64932	26.2408	3.01755e-07	0.00132358
Ptgds	15	-0.0777001	9.68559	0.520266	0.470729	1	-0.554105	9.80081	24.2077	8.6575e-07	0.00295355
Rgs16	15	0.0411442	6.7537	0.0270708	0.869313	1	0.987324	7.62798	22.2527	2.39229e-06	0.00734527
Snhg11	15	0.233146	12.592	12.6469	0.000376307	0.63607	0.556766	12.5803	72.7855	1.45824e-17	1.11935e-13
Srrd	15	-1.52845	6.35926	23.0792	1.55606e-06	0.00682534	0.356267	5.60455	0.735225	0.391196	1
Tsix	15	-1.46911	8.1322	73.3088	1.11872e-17	1.71746e-13	-2.2498	7.96183	127.231	1.69875e-29	1.73862e-25
Xist	15	-5.80274	10.5487	1636.85	0	0	-6.89852	10.6152	1888.68	0	0
4933412L11Rik	16	2.02275	5.59511	37.1552	1.09349e-09	8.39366e-06	0.463334	5.39262	1.37434	0.241069	1
D830024N08Rik	16	1.20344	6.78771	32.2194	1.37957e-08	7.05974e-05	0.37698	8.05091	5.88569	0.0152656	1
Gm20754	16	0.97446	4.98438	5.63024	0.0176544	1	1.55234	5.92183	22.1421	2.53413e-06	0.0237577
Gm26699	16	1.31197	5.8037	19.0222	1.29288e-05	0.0396967	-0.32822	6.99666	2.32153	0.127597	1
Gtf2a2	16	1.02411	8.13095	51.1401	8.63842e-13	1.32617e-08	-0.00609662	7.42929	0.00108075	0.973774	1
Jpx	16	-3.18264	4.67112	19.0612	1.26674e-05	0.0396967	-1.84607	4.73109	8.24951	0.00407687	1
Mastl	16	3.68648	4.1631	18.4919	1.70729e-05	0.0476552	0.301537	5.27322	0.534486	0.464728	1
Nfic	16	0.0658812	6.18774	0.064693	0.799227	1	-1.10783	8.84443	69.2891	8.57247e-17	1.31604e-12
Nosip	16	-0.0464489	8.01424	0.0988019	0.753273	1	-0.68718	8.32973	21.7583	3.09506e-06	0.0237577
Sh3bgrl	16	0.78234	7.37036	19.3915	1.06552e-05	0.0396967	0.21612	6.25271	0.58797	0.443207	1
Srrd	16	-1.63144	6.68543	42.8323	5.98267e-11	6.12306e-07	-0.300681	5.72144	0.785732	0.375395	1
Tsix	16	-0.793141	8.41993	33.7239	6.36415e-09	3.9081e-05	-0.602237	8.23067	16.0808	6.07248e-05	0.266356
Tubb2a	16	-1.26978	6.40405	19.513	9.99871e-06	0.0396967	-0.0478436	10.0081	0.236767	0.626552	1
Xist	16	-5.19771	10.185	1406.16	2.37795e-306	7.30125e-302	-5.18617	9.99197	1207.96	1.21195e-263	3.72118e-259
4933412L11Rik	17	1.99578	5.70011	36.3451	1.6567e-09	1.27168e-05	0.33251	5.69366	0.861706	0.353263	1
Chdh	17	3.13313	4.45806	20.1788	7.05802e-06	0.0300773	-0.782747	5.42994	3.52972	0.06028	1
Crh	17	-0.438752	8.06261	10.0424	0.0015301	1	-0.830538	8.17696	27.4356	1.6263e-07	0.000832234
Gm43320	17	0.58541	5.30295	2.73626	0.0980961	1	1.38767	7.2106	39.284	3.67394e-10	2.82012e-06
Gtf2a2	17	1.32884	8.1369	93.5147	4.09095e-22	6.28042e-18	0.262909	7.34996	1.73732	0.18748	1
Jpx	17	-3.00769	4.46364	18.7564	1.48615e-05	0.0456309	-2.84946	4.90824	16.4113	5.10047e-05	0.195756
Mest	17	-0.563478	8.36757	19.9787	7.8367e-06	0.0300773	0.348386	6.8726	2.22206	0.136053	1
Nfic	17	-0.493446	6.43056	4.51076	0.0336839	1	-1.09495	8.77538	63.4259	1.67646e-15	2.5737e-11
Nts	17	-0.32886	10.7104	19.1574	1.20447e-05	0.041091	-0.330584	10.6179	15.0744	0.000103398	0.352748
Sgcd	17	0.83666	7.16877	20.8368	5.00524e-06	0.0256135	0.394565	7.17299	3.48807	0.0618146	1
Snhg11	17	0.127848	13.9215	7.36914	0.00663601	1	0.271668	13.5919	30.1064	4.09619e-08	0.000251539
Srrd	17	-1.54352	6.60267	43.6511	3.93733e-11	4.02972e-07	-0.372874	5.6679	1.04151	0.307471	1
Tsix	17	-0.778762	7.46197	21.4524	3.63019e-06	0.0222923	-1.87187	6.94315	53.0357	3.29095e-13	3.36818e-09
Xist	17	-5.58214	9.79472	1574.52	0	0	-6.59427	9.52988	1138.05	1.4518e-248	4.45762e-244
4933412L11Rik	18	1.43692	5.64881	19.3653	1.08026e-05	0.0331683	0.585008	5.56973	2.85859	0.0908892	1
Chdh	18	2.23643	5.46417	35.1313	3.08867e-09	2.37087e-05	-0.280239	5.88219	0.827103	0.363113	1
Col9a2	18	0.79992	3.38264	0.160338	0.688846	1	-5.17804	4.56387	25.0165	5.69058e-07	0.00349447
D830024N08Rik	18	0.996084	6.79959	21.0812	4.40566e-06	0.0178047	0.160772	7.85913	0.98307	0.321444	1
Gm26699	18	1.86661	5.90254	37.415	9.5713e-10	1.32931e-05	0.0255686	7.11226	0.0159968	0.899353	1
Gm43320	18	-0.0184509	5.74527	0.00362241	0.952007	1	1.12005	8.30116	48.3383	3.60092e-12	3.68543e-08
Gtf2a2	18	0.736704	8.24122	25.094	5.46639e-07	0.0033568	-0.131223	7.6682	0.581635	0.445673	1
Mest	18	-0.878193	7.37163	22.5623	2.03623e-06	0.0104201	-0.188861	6.25066	0.49153	0.483247	1
Nfic	18	0.0622582	6.78137	0.0837288	0.772307	1	-1.0411	9.56919	88.3173	5.64832e-21	8.6713e-17
Srrd	18	-1.17917	6.36351	20.9823	4.63905e-06	0.0178047	0.425027	5.6063	1.56979	0.210239	1
Tsix	18	-1.04623	7.67029	36.8196	1.29883e-09	1.32931e-05	-1.20831	7.53117	41.6965	1.06914e-10	8.20668e-07
Tubb2a	18	-1.34782	6.13001	19.6016	9.54535e-06	0.0325645	-0.0213582	9.99912	0.0510731	0.821207	1
Xist	18	-4.98881	10.2007	1134.88	7.01913e-248	2.15515e-243	-6.31572	10.1499	1656.71	0	0
4933412L11Rik	19	2.1483	5.51223	35.2842	2.85544e-09	2.19184e-05	0.707743	5.2666	2.34617	0.125594	1
Ebf1	19	1.59683	5.57625	21.3511	3.82716e-06	0.0117509	0.389086	4.3504	0.159844	0.689301	1
Gm26538	19	-2.43198	5.46641	26.99	2.04771e-07	0.000898186	-0.266559	4.30612	0.0642623	0.799882	1
Gm43320	19	-0.0873542	5.19457	0.0474543	0.827554	1	1.37256	6.78586	24.1084	9.11544e-07	0.00699701
Gtf2a2	19	1.32596	8.29099	78.1756	9.52421e-19	1.46216e-14	-0.0450988	7.54734	0.0496961	0.823593	1
Jpx	19	-3.42145	5.25011	39.0645	4.11102e-10	4.20749e-06	-2.43632	4.76139	9.47301	0.00208554	1
Nfic	19	0.28595	6.36656	1.19263	0.274801	1	-1.45496	8.74654	91.4106	1.18383e-21	1.81741e-17
Nosip	19	0.128816	8.18838	0.712499	0.398617	1	-0.738684	8.43166	21.5997	3.36188e-06	0.0172039
Ptgds	19	-0.0550684	9.31839	0.216325	0.641855	1	-0.647932	9.437	29.4982	5.60531e-08	0.000573684
Srrd	19	-1.41166	6.61885	27.7667	1.37047e-07	0.000701315	0.434453	5.64861	1.26156	0.261359	1
Tac1	19	-0.602882	9.48646	24.7408	6.56504e-07	0.00251966	-0.242108	7.9118	1.66666	0.196709	1
Tsix	19	-0.672956	8.34142	19.6101	9.50311e-06	0.0265258	-0.860824	8.07324	23.4226	1.3017e-06	0.00799346
Tubb2a	19	-1.64677	6.54069	28.3335	1.02255e-07	0.000627925	-0.0462523	10.117	0.232668	0.629553	1
Xist	19	-4.83957	10.1329	1076.52	2.74543e-235	8.42956e-231	-5.09428	9.92627	1091.03	2.03432e-238	6.24616e-234
Zmynd8	19	-0.711771	8.37441	22.1616	2.50855e-06	0.00855807	-0.346927	8.11689	4.07474	0.0435308	1
4933412L11Rik	20	4.27408	5.29851	27.3614	1.68989e-07	0.000864771	-0.0731439	5.2657	0.025982	0.871945	1
D830024N08Rik	20	1.44449	7.0108	24.7189	6.64016e-07	0.0025485	0.0819041	7.76712	0.208372	0.648047	1
Gm28040	20	-4.74482	8.54481	261.766	7.9117e-59	1.2146e-54	-3.89035	8.04897	235.586	3.95132e-53	6.06607e-49
Gm34066	20	-0.105401	5.80184	0.0511145	0.821136	1	-1.70525	5.87319	20.5609	5.78081e-06	0.0295196
Gtf2a2	20	0.983149	8.28748	28.1554	1.12107e-07	0.000688428	0.349692	7.41887	3.0111	0.0826983	1
Nfic	20	0.0539672	6.17077	0.0199647	0.887636	1	-1.34734	8.70809	86.1464	1.69174e-20	1.73144e-16
Nosip	20	0.136799	8.36028	0.582363	0.445389	1	-0.665972	8.49916	20.2699	6.72997e-06	0.0295196
Pomc	20	1.99618	6.46308	28.3691	1.00393e-07	0.000688428	1.12972	5.1444	5.31096	0.021193	1
Slitrk6	20	-1.08952	5.82824	5.32609	0.0210098	1	-2.02763	5.52055	19.6905	9.11138e-06	0.0349695
Snhg11	20	0.149806	13.6656	7.78926	0.00525642	1	0.325399	13.4244	42.5256	6.99768e-11	4.29713e-07
Srrd	20	-2.01181	6.555	26.4276	2.73936e-07	0.00120156	0.244617	5.67472	0.430572	0.511709	1
Th	20	-0.950193	8.06811	21.0935	4.37746e-06	0.0149339	-0.419216	7.13682	3.47912	0.0621499	1
Tsix	20	-1.08959	8.28816	32.3962	1.25957e-08	0.000128913	-1.52681	7.96206	69.114	9.36813e-17	7.19098e-13
Xist	20	-6.94778	10.3953	1334.28	7.19394e-291	2.20883e-286	-7.22382	10.3317	1809.36	0	0
4933412L11Rik	21	1.81033	5.34432	22.5688	2.02931e-06	0.0103847	0.0245676	5.13351	0.00274837	0.95819	1
Gm43320	21	-0.113509	4.4524	0.0347346	0.852153	1	1.47421	6.84702	29.132	6.77105e-08	0.000692995
Gtf2a2	21	1.09956	7.71017	40.3741	2.1029e-10	2.15225e-06	0.0326048	7.38822	0.0243842	0.875912	1
Nfic	21	0.224211	5.96817	0.587901	0.443233	1	-0.866304	8.43508	28.3867	9.94826e-08	0.000763628
Nts	21	-1.74503	7.34157	65.2868	6.52177e-16	1.00122e-11	0.00428701	7.01324	0.000324884	0.985619	1
Srrd	21	-1.33929	6.63813	26.7904	2.27041e-07	0.00139422	0.281964	5.78447	0.613683	0.433406	1
Sst	21	0.546754	8.70129	15.2054	9.64689e-05	0.328226	-0.659619	8.80071	20.1991	6.98369e-06	0.0428855
Tubb2a	21	-1.62428	6.68098	31.4406	2.05992e-08	0.00015812	-0.0347846	10.4143	0.114573	0.734997	1
Vip	21	-2.00082	4.24381	5.28677	0.0214894	1	-3.17145	6.5629	78.0244	1.02813e-18	1.57839e-14
Xist	21	-5.30956	9.48888	821.827	2.90827e-180	8.92957e-176	-6.47689	9.28009	771.514	2.21978e-169	6.81562e-165
4933412L11Rik	22	2.83698	5.79433	41.1155	1.43905e-10	1.47282e-06	0.356126	5.12341	0.462994	0.496229	1
D830024N08Rik	22	1.2204	6.91259	23.124	1.52027e-06	0.00777974	-0.0504956	7.84312	0.0702109	0.79103	1
Gtf2a2	22	1.15609	8.07941	40.12	2.39489e-10	1.83831e-06	-0.215732	7.41245	1.00444	0.31624	1
Nfic	22	0.343643	6.42133	1.4782	0.224058	1	-0.922357	8.74348	33.3675	7.64363e-09	5.86725e-05
Npy	22	-0.631112	9.29497	19.0468	1.27633e-05	0.0559833	1.16541	8.74169	48.8204	2.81642e-12	4.32377e-08
Trh	22	0.00907797	5.32986	0.000488948	0.982359	1	1.62795	6.73056	31.6096	1.88818e-08	0.00011595
Tsix	22	-1.25091	6.94559	26.8912	2.15514e-07	0.00132343	-1.76839	6.93191	42.4394	7.31318e-11	7.48479e-07
Xist	22	-6.14237	9.46867	887.909	1.50271e-194	4.61393e-190	-5.38735	9.35399	692.557	2.71226e-152	8.32772e-148
Yjefn3	22	-2.54599	6.66276	62.6638	2.468e-15	3.78888e-11	-0.607989	4.98596	1.01277	0.314242	1
4933412L11Rik	23	2.02021	6.0959	23.8506	1.04213e-06	0.00533295	-0.615678	5.41146	1.50366	0.22011	1
Foxn2	23	0.841454	4.50033	0.524046	0.469122	1	1.15136	7.5204	23.8366	1.04976e-06	0.00805794
Gtf2a2	23	0.889934	8.21606	25.5519	4.31132e-07	0.00330937	0.489539	7.38278	4.62151	0.031575	1
Meg3	23	0.271611	13.4582	27.0853	1.94918e-07	0.00199492	0.0932469	13.4913	2.35031	0.12526	1
Nfic	23	-0.148408	5.92196	0.15542	0.693409	1	-1.07215	8.59923	42.9265	5.7013e-11	8.75263e-07
Nosip	23	-0.0835768	8.26303	0.245948	0.619943	1	-0.738679	8.68408	22.9102	1.6991e-06	0.0104338
Snhg11	23	0.278835	13.8495	31.4046	2.09839e-08	0.000322144	0.269725	13.602	20.2197	6.90888e-06	0.035355
Tsix	23	-1.0187	7.684	24.0438	9.42639e-07	0.00533295	-1.35617	7.66763	39.6426	3.05776e-10	3.12952e-06
Xist	23	-5.93347	10.1956	1476.4	1.79345829440372e-321	5.5066343471372e-317	-5.54387	10.1104	1142.54	1.56229e-249	4.79687e-245
D830024N08Rik	24	2.32121	7.27897	33.0285	9.12455e-09	7.00401e-05	0.0888213	8.14532	0.111201	0.738783	1
Gm26699	24	2.77355	6.65088	45.405	1.61631e-11	1.65424e-07	0.236422	7.14724	0.516236	0.472454	1
Sema3c	24	3.89915	5.03557	23.1152	3.55235e-06	0.0181786	-1.23621	4.00499	0.275051	0.599966	1
Srrd	24	-1.99019	7.01977	24.4808	7.52533e-07	0.00462116	-0.0899688	6.3583	0.0508471	0.821597	1
Tsix	24	-3.18459	6.94936	50.4966	1.20667e-12	1.85247e-08	-4.41354	6.83865	67.9932	1.67269e-16	2.56792e-12
Xist	24	-5.5936	10.2247	85.7945	2.05854e-20	6.32055e-16	-6.87653	10.4771	334.128	1.91192e-74	5.87037e-70
Arl5b	25	2.29382	5.77634	21.3822	3.76553e-06	0.0231233	-0.719568	6.10255	2.52581	0.111999	1
Gtf2a2	25	1.11497	8.2352	33.9537	5.65517e-09	8.68182e-05	0.0801424	7.49926	0.0919502	0.761713	1
Nfic	25	-0.0647358	6.3118	0.0338772	0.853968	1	-1.44428	8.32887	43.9299	3.41747e-11	3.49767e-07
Ptgds	25	0.12576	9.844	1.16105	0.28125	1	-0.896515	10.0922	51.6863	6.54856e-13	1.00534e-08
Srrd	25	-1.69484	6.688	25.8401	3.7134e-07	0.00345916	0.264661	6.0624	0.354423	0.551621	1
Tsix	25	-0.311129	8.14248	2.61269	0.106014	1	-0.964044	8.31691	20.9375	4.74968e-06	0.0364586
Tubb2a	25	-1.84769	6.66418	25.4665	4.50646e-07	0.00345916	-0.0387796	10.2698	0.113118	0.736623	1
Xist	25	-6.69572	9.97639	1061.14	5.7449e-232	1.76391e-227	-5.10272	9.94863	627.799	3.35671e-138	1.03064e-133
Gnrh1	26	1.99058	5.39739	13.1918	0.000281263	0.431796	-3.12441	6.62425	35.928	2.05199e-09	2.10014e-05
Gtf2a2	26	0.951105	8.0975	30.9438	2.66053e-08	0.000408445	-0.00360749	7.61637	0.000268323	0.986931	1
Nfic	26	0.154829	6.35984	0.252742	0.615152	1	-1.00173	9.15587	46.3037	1.0164e-11	1.56038e-07
Snhg11	26	0.213928	13.947	22.6752	1.91998e-06	0.0147377	0.228638	13.5388	12.5738	0.000391307	1
Srrd	26	-1.59755	6.66729	29.8151	4.76019e-08	0.00048719	-0.0787821	5.90891	0.0341304	0.85343	1
Tsix	26	-0.675272	8.48496	21.1301	4.29482e-06	0.0263736	-0.705115	8.25199	14.943	0.000110854	0.42546
Xist	26	-6.12922	9.9843	1473.52	7.48509453449489e-321	2.29822342587131e-316	-4.81539	9.9288	818.566	1.4751e-179	4.52915e-175
4933412L11Rik	27	2.24556	6.0268	35.9843	1.99361e-09	2.04039e-05	0.565552	5.6859	1.26964	0.259835	1
Gtf2a2	27	1.3155	8.13709	59.2874	1.37056e-14	2.10408e-10	0.00905243	7.31302	0.00120881	0.972265	1
Nfic	27	0.0357485	6.53404	0.016041	0.899215	1	-1.06411	9.0329	40.4307	2.04281e-10	3.13612e-06
Srrd	27	-1.87844	6.45255	32.722	1.06524e-08	8.17675e-05	-0.328169	5.76095	0.434782	0.509653	1
Tubb2a	27	-1.55001	6.51522	20.2085	6.94927e-06	0.0426741	-0.199262	10.109	2.82897	0.0925795	1
Xist	27	-5.1306	9.76773	963.524	6.89022e-211	2.11557e-206	-5.92238	9.60546	593.56	7.47907e-131	2.29637e-126
Gtf2a2	28	1.30126	8.25205	43.6869	3.86605e-11	5.93517e-07	-0.255897	7.57253	0.943783	0.331308	1
Nfic	28	-0.746324	6.18183	3.73131	0.0534033	1	-1.01043	8.60013	23.9701	9.79417e-07	0.010024
Tsix	28	-1.1946	8.30103	36.4288	1.58706e-09	1.62431e-05	-1.39241	7.87789	30.046	4.22583e-08	0.000648749
Xist	28	-6.26495	10.4347	1067.37	2.59211e-233	7.95883e-229	-6.72864	10.1473	754.57	1.02817e-165	3.15691e-161
Cartpt	29	0.0258034	11.4976	0.066748	0.796132	1	-1.37773	9.6713	61.6742	4.07861e-15	6.26148e-11
Fos	29	1.20958	9.19483	69.6578	7.12582e-17	1.09396e-12	0.46211	8.09743	3.19744	0.0737555	1
Fosb	29	2.0227	5.85112	20.5457	5.82792e-06	0.0298234	2.64813	5.44221	3.77056	0.0521641	1
Gm26699	29	2.22889	5.75557	21.6789	3.22661e-06	0.019814	0.180112	7.21157	0.26504	0.606679	1
Nts	29	1.46872	7.93429	47.4709	5.60942e-12	5.74105e-08	-0.884779	8.5878	15.073	0.000103476	0.515648
Pde10a	29	0.606694	9.41898	19.1568	1.20504e-05	0.0462495	0.445081	9.16144	5.49366	0.0190868	1
Pmch	29	-3.09306	6.72812	42.8014	6.08263e-11	4.66903e-07	1.53506	5.60699	2.45249	0.117341	1
Trh	29	-0.868146	8.14598	19.502	1.00581e-05	0.0441175	-0.335661	8.60493	2.22288	0.135982	1
Tsix	29	-0.834157	8.12369	18.4424	1.75255e-05	0.0538104	-1.32832	8.11729	24.0049	9.61881e-07	0.00984453
Xist	29	-5.69338	10.3463	969.6	4.9049e-212	1.506e-207	-5.85767	10.3224	592.66	1.17179e-130	3.59787e-126
Snhg11	30	0.112092	13.99	3.25862	0.0710507	1	0.351553	13.6796	26.1172	3.21696e-07	0.00493868
Srrd	30	-1.62001	6.78824	27.2667	1.77466e-07	0.00272446	0.318745	5.29623	0.336919	0.561614	1
Tac2	30	0.452141	7.88758	4.83361	0.0279116	1	-0.845369	8.20517	21.0272	4.53175e-06	0.046381
Tsix	30	-1.21257	7.17469	22.3744	2.24544e-06	0.0229813	-1.06296	7.15482	17.2369	3.30144e-05	0.202735
Xist	30	-5.23283	9.54419	701.214	3.62643e-154	1.11346e-149	-4.91521	9.19992	591.766	1.83065e-130	5.62081e-126
4933412L11Rik	31	2.75339	5.58963	21.5468	3.45588e-06	0.0154841	-0.955937	5.49061	1.63751	0.200669	1
Gal	31	-0.77959	11.0688	84.8898	3.19284e-20	4.90165e-16	-0.569804	11.3058	20.6134	5.62431e-06	0.0575629
Gtf2a2	31	1.21224	8.13235	37.5506	8.92875e-10	9.13827e-06	0.229876	7.41395	0.598226	0.439257	1
Nfic	31	0.240967	6.45231	0.501444	0.478868	1	-1.4459	8.96821	49.4898	2.00234e-12	3.07399e-08
Nts	31	-0.658772	9.16957	21.506	3.53011e-06	0.0154841	0.108826	9.49755	0.380584	0.537292	1
Srrd	31	-1.6831	6.74138	24.6793	6.77815e-07	0.00416233	0.284313	5.97095	0.297136	0.585684	1
Tubb2a	31	-2.69843	6.47026	36.1374	1.84298e-09	1.41467e-05	-0.187322	9.76161	1.33654	0.247646	1
Xist	31	-6.64797	9.8196	953.669	9.26852e-209	2.84581e-204	-5.77201	9.68494	447.599	3.33191e-99	1.02303e-94
Nfic	32	0.0604653	6.44685	0.0247212	0.875064	1	-1.27571	8.77448	42.4183	7.3924e-11	1.13488e-06
Snhg11	32	0.194376	13.8445	1.86969	0.171513	1	0.365632	13.3903	24.5173	7.37219e-07	0.00754519
Srrd	32	-2.41972	6.90995	42.122	8.60796e-11	1.32149e-06	-0.124443	5.73616	0.0492085	0.824447	1
Xist	32	-5.7654	9.69942	400.344	6.43045e-89	1.97441e-84	-5.27484	9.41355	492.916	4.91509e-109	1.50913e-104
Nfic	33	-0.162628	6.94032	0.298786	0.584645	1	-0.924861	8.91127	24.7418	6.56191e-07	0.0100738
Oxt	33	1.13332	7.89169	21.8612	2.93355e-06	0.0450359	-0.128517	7.85583	0.319726	0.571773	1
Pmch	33	-0.285987	4.78111	0.0523875	0.81896	1	-3.04381	5.66112	22.418	2.1951e-06	0.0224661
Xist	33	-4.64272	9.54344	482.188	1.04334e-106	3.20347e-102	-7.52057	9.45073	582.365	1.99359e-128	6.12111e-124
Nfic	34	0.111953	6.16502	0.0764636	0.782149	1	-1.13311	9.37029	35.7179	2.28564e-09	2.33928e-05
Oxt	34	0.110288	8.99239	0.495409	0.481525	1	-0.835889	11.9744	45.3375	1.66426e-11	2.55497e-07
Ralyl	34	-0.381467	8.14911	3.77165	0.05213	1	1.50745	7.88893	22.6316	1.9641e-06	0.0100509
Snhg11	34	0.0484092	13.8513	0.453958	0.500463	1	0.567495	13.7408	30.9905	2.59721e-08	0.000199362
Tsix	34	-1.19268	7.83428	27.8676	1.3008e-07	0.00199698	-1.62728	7.83886	26.2344	3.02755e-07	0.00185916
Xist	34	-6.27582	10.0261	897.523	1.25624e-196	3.85716e-192	-4.82821	10.2245	484.858	2.74921e-107	8.44118e-103
Dlk1	35	-1.00584	8.78898	22.5763	2.02141e-06	0.0307905	-0.320664	8.32869	1.35289	0.244775	1
Gtf2a2	35	1.23719	8.0479	21.8128	3.00845e-06	0.0307905	0.25798	7.60369	0.623069	0.42991	1
Xist	35	-4.56948	9.95805	492.743	5.35705e-109	1.64483e-104	-5.40327	9.60706	272.551	3.56249e-61	1.09383e-56
Ebf1	36	1.32775	6.29371	7.86547	0.00503941	1	5.78235	6.51031	44.406	2.67769e-11	4.1108e-07
Gm43320	36	0.765788	6.48357	3.50859	0.0610533	1	1.5347	7.74329	25.1896	5.20182e-07	0.00532389
Lmo3	36	1.92705	6.94765	24.9548	5.8753e-07	0.00901977	-0.80932	6.95272	4.05405	0.0440672	1
Tsix	36	-1.05601	6.99116	8.88459	0.00287633	1	-1.93555	7.13038	21.6468	3.28038e-06	0.0251802
Xist	36	-4.63498	9.61034	235.9	3.37554e-53	1.03643e-48	-6.23487	9.30871	356.18	2.35175e-79	7.2208e-75
4933412L11Rik	37	5.05686	5.8488	25.7536	3.88357e-07	0.00596206	1.01858	5.99644	1.36129	0.243316	1
Oxt	37	-0.143189	7.9209	0.251049	0.616338	1	1.32942	8.65267	26.654	2.43655e-07	0.00374059
Xist	37	-4.07027	9.92487	360.245	3.07852e-80	9.45229e-76	-5.19145	9.52482	329.011	1.88442e-73	5.78592e-69
Snhg11	38	0.137498	11.6374	1.34289	0.246527	1	0.728066	11.9461	53.1746	3.06646e-13	4.70763e-09
Xist	38	-5.42517	10.0667	417.898	9.30763e-93	2.85781e-88	-5.8692	9.98202	559.011	2.29642e-123	7.05093e-119
Xist	39	-4.85701	10.0646	157.571	3.99984e-36	1.22811e-31	-4.91809	9.90701	119.89	6.88988e-28	2.11547e-23
Oxt	40	-0.368538	15.5527	19.4739	1.02053e-05	0.0783359	-1.10855	15.3392	147.631	5.92163e-34	9.09089e-30
Penk	40	-2.2791	8.34129	44.1597	3.03653e-11	4.66169e-07	0.754603	8.38302	3.22438	0.0725512	1
Tsix	40	-1.52146	8.23558	21.5968	3.36695e-06	0.0344596	-2.98902	8.27437	30.9353	2.6722e-08	0.000273491
Xist	40	-7.86864	10.3352	494.535	2.18996e-109	6.72404e-105	-7.63834	10.3861	283.744	1.3095e-63	4.0207e-59
Ptgds	41	0.30821	9.82978	0.887417	0.34618	1	-1.65538	10.5273	22.6716	1.92366e-06	0.019688
Tsix	41	-1.86373	8.45376	13.4293	0.000247812	1	-2.71705	8.53704	27.943	1.25114e-07	0.00192075
Xist	41	-5.20279	10.8254	185.024	4.10218e-42	1.25953e-37	-7.51609	10.9539	213.848	2.14236e-48	6.5779e-44
Gm26699	42	3.01177	6.84627	24.5078	7.44017e-07	0.0114221	0.54911	7.41266	0.79042	0.373977	1
Tsix	42	-0.565229	7.48748	1.5987	0.206097	1	-4.1523	7.69687	25.2277	5.10879e-07	0.00784302
Vps29	42	1.77269	8.4165	22.1702	2.50608e-06	0.0256489	-0.345792	7.99283	0.435827	0.509146	1
Xist	42	-5.89666	10.3602	236.997	2.81079e-53	8.63023e-49	-8.12417	10.3889	115.968	5.10684e-27	1.568e-22
Xist	43	-5.74103	10.5791	21.9777	2.77018e-06	0.0850556	-4.65887	10.5444	41.3505	1.27608e-10	3.91809e-06
Penk	44	-0.384162	8.79525	1.46621	0.225947	1	-1.4131	10.2732	25.3455	4.7982e-07	0.0073662
Xist	44	-8.96389	9.72699	242.976	9.72277e-55	2.98528e-50	-6.95413	9.36548	133.969	5.71738e-31	1.75546e-26
Xist	45	-4.85571	10.3114	203.93	3.10389e-46	9.53018e-42	-6.42521	10.0217	131.539	1.94241e-30	5.96396e-26
Xist	46	-6.45978	10.8199	92.1014	8.3516e-22	2.56427e-17	-6.84245	10.6495	298.757	7.11127e-67	2.18344e-62
Xist	47	-5.43273	9.73566	233.191	1.34248e-52	4.12194e-48	-5.713	9.66307	93.164	4.8836e-22	1.49946e-17
Xist	48	-7.98841	9.55352	90.9385	1.50259e-21	4.61355e-17	-7.79928	9.44059	73.5081	1.01362e-17	3.11223e-13
Xist	49	-6.13991	9.61605	129.712	4.90561e-30	1.50622e-25	-3.21379	9.20283	77.9417	1.07482e-18	3.30013e-14
Xist	50	-7.12392	10.1599	159.714	1.36292e-36	4.1847e-32	-6.26087	9.96738	98.1473	3.94661e-23	1.21177e-18
Xist	51	-6.23055	10.9468	70.7898	4.05813e-17	1.24601e-12	-5.74396	10.7409	65.4571	5.99302e-16	1.8401e-11
Xist	52	-2.09706	9.94208	9.15271	0.00248401	1	-7.2932	9.93515	30.4208	3.4917e-08	0.00107209
