# Supplementary material for: Cellular evolution of the hypothalamic preoptic area of behaviorally divergent deer mice
Source: eLife. 2025 Apr 7;13:RP103109. doi: 10.7554/eLife.103109 (PMC11975375; doi:10.7554/eLife.103109)
Supplement: Supplementary file 5. [file elife-103109-supp5.xlsx]

## Sheet: Sheet1
Supplementary File 5. Gene lists
Gene	Annotation
Adcyap1	neuropeptide
Adm	neuropeptide
Agrp	neuropeptide
Avp	neuropeptide
Bdnf	neuropeptide
Calca	neuropeptide
Calcb	neuropeptide
Cartpt	neuropeptide
Cck	neuropeptide
Cort	neuropeptide
Crh	neuropeptide
Edn1	neuropeptide
Edn2	neuropeptide
Edn3	neuropeptide
Gal	neuropeptide
Gast	neuropeptide
Gcg	neuropeptide
Ghrh	neuropeptide
Ghrl	neuropeptide
Gip	neuropeptide
Gm28040	neuropeptide
Gnrh1	neuropeptide
Grp	neuropeptide
Hcrt	neuropeptide
Igf1	neuropeptide
Igf2	neuropeptide
Kng2	neuropeptide
Nmb	neuropeptide
Nms	neuropeptide
Nmu	neuropeptide
Nos1	neuropeptide
Npb	neuropeptide
Nppa	neuropeptide
Nppb	neuropeptide
Nppc	neuropeptide
Nps	neuropeptide
Npvf	neuropeptide
Npw	neuropeptide
Npy	neuropeptide
Nts	neuropeptide
Oxt	neuropeptide
Pdyn	neuropeptide
Penk	neuropeptide
Pmch	neuropeptide
Pnoc	neuropeptide
Pomc	neuropeptide
Ppy	neuropeptide
Prlh	neuropeptide
Prok1	neuropeptide
Prok2	neuropeptide
Pth	neuropeptide
Pthlh	neuropeptide
Pyy	neuropeptide
Qrfp	neuropeptide
Retn	neuropeptide
Rln1	neuropeptide
Rln3	neuropeptide
Sct	neuropeptide
Spx	neuropeptide
Sst	neuropeptide
Tac1	neuropeptide
Tac2	neuropeptide
Tac4	neuropeptide
Trh	neuropeptide
Ucn	neuropeptide
Ucn2	neuropeptide
Ucn3	neuropeptide
Vgf	neuropeptide
Vip	neuropeptide
Adcyap1r1	neuropeptide_receptor
Agtr1a	neuropeptide_receptor
Agtr1b	neuropeptide_receptor
Agtr2	neuropeptide_receptor
Ar	neuropeptide_receptor
Avpr1a	neuropeptide_receptor
Avpr1b	neuropeptide_receptor
Avpr2	neuropeptide_receptor
Brs3	neuropeptide_receptor
Calcr	neuropeptide_receptor
Calcrl	neuropeptide_receptor
Cckar	neuropeptide_receptor
Cckbr	neuropeptide_receptor
Crhr1	neuropeptide_receptor
Crhr2	neuropeptide_receptor
Ednra	neuropeptide_receptor
Ednrb	neuropeptide_receptor
Esr1	neuropeptide_receptor
Esr2	neuropeptide_receptor
Galr1	neuropeptide_receptor
Galr2	neuropeptide_receptor
Gcgr	neuropeptide_receptor
Ghr	neuropeptide_receptor
Ghrhr	neuropeptide_receptor
Gipr	neuropeptide_receptor
Gnrhr	neuropeptide_receptor
Grpr	neuropeptide_receptor
Hcrtr1	neuropeptide_receptor
Hcrtr2	neuropeptide_receptor
Kiss1r	neuropeptide_receptor
Lepr	neuropeptide_receptor
Mc1r	neuropeptide_receptor
Mc2r	neuropeptide_receptor
Mc3r	neuropeptide_receptor
Mc4r	neuropeptide_receptor
Nmbr	neuropeptide_receptor
Nmur1	neuropeptide_receptor
Nmur2	neuropeptide_receptor
Npbwr1	neuropeptide_receptor
Npffr1	neuropeptide_receptor
Npr1	neuropeptide_receptor
Npr2	neuropeptide_receptor
Npr3	neuropeptide_receptor
Npsr1	neuropeptide_receptor
Npy1r	neuropeptide_receptor
Npy2r	neuropeptide_receptor
Npy4r	neuropeptide_receptor
Npy5r	neuropeptide_receptor
Npy6r	neuropeptide_receptor
Nr3c1	neuropeptide_receptor
Nr3c2	neuropeptide_receptor
Ntrk2	neuropeptide_receptor
Oprd1	neuropeptide_receptor
Oprk1	neuropeptide_receptor
Oprl1	neuropeptide_receptor
Oprm1	neuropeptide_receptor
Oxtr	neuropeptide_receptor
Pgr	neuropeptide_receptor
Prlr	neuropeptide_receptor
Prokr1	neuropeptide_receptor
Prokr2	neuropeptide_receptor
Pth1r	neuropeptide_receptor
Pth2r	neuropeptide_receptor
Qrfpr	neuropeptide_receptor
Ramp1	neuropeptide_receptor
Ramp2	neuropeptide_receptor
Ramp3	neuropeptide_receptor
Rxfp1	neuropeptide_receptor
Rxfp2	neuropeptide_receptor
Rxfp3	neuropeptide_receptor
Rxfp4	neuropeptide_receptor
Sctr	neuropeptide_receptor
Sstr1	neuropeptide_receptor
Sstr2	neuropeptide_receptor
Sstr3	neuropeptide_receptor
Sstr4	neuropeptide_receptor
Sstr5	neuropeptide_receptor
Tacr1	neuropeptide_receptor
Tacr2	neuropeptide_receptor
Tacr3	neuropeptide_receptor
Trhr	neuropeptide_receptor
Vipr1	neuropeptide_receptor
Vipr2	neuropeptide_receptor
Adora1	neurotransmitter_receptor
Adora2a	neurotransmitter_receptor
Adora2b	neurotransmitter_receptor
Adora3	neurotransmitter_receptor
Adra1a	neurotransmitter_receptor
Adra1b	neurotransmitter_receptor
Adra1d	neurotransmitter_receptor
Adra2a	neurotransmitter_receptor
Adra2b	neurotransmitter_receptor
Adra2c	neurotransmitter_receptor
Adrb1	neurotransmitter_receptor
Adrb2	neurotransmitter_receptor
Adrb3	neurotransmitter_receptor
Chrm1	neurotransmitter_receptor
Chrm2	neurotransmitter_receptor
Chrm3	neurotransmitter_receptor
Chrm4	neurotransmitter_receptor
Chrm5	neurotransmitter_receptor
Chrna1	neurotransmitter_receptor
Chrna10	neurotransmitter_receptor
Chrna2	neurotransmitter_receptor
Chrna3	neurotransmitter_receptor
Chrna4	neurotransmitter_receptor
Chrna5	neurotransmitter_receptor
Chrna6	neurotransmitter_receptor
Chrna7	neurotransmitter_receptor
Chrna9	neurotransmitter_receptor
Chrnb1	neurotransmitter_receptor
Chrnb2	neurotransmitter_receptor
Chrnb3	neurotransmitter_receptor
Chrnb4	neurotransmitter_receptor
Chrnd	neurotransmitter_receptor
Chrne	neurotransmitter_receptor
Chrng	neurotransmitter_receptor
Cnr1	neurotransmitter_receptor
Drd1	neurotransmitter_receptor
Drd2	neurotransmitter_receptor
Drd3	neurotransmitter_receptor
Drd4	neurotransmitter_receptor
Drd5	neurotransmitter_receptor
Gabra2	neurotransmitter_receptor
Gabra3	neurotransmitter_receptor
Gabra4	neurotransmitter_receptor
Gabra5	neurotransmitter_receptor
Gabrb1	neurotransmitter_receptor
Gabre	neurotransmitter_receptor
Gabrr2	neurotransmitter_receptor
Gria1	neurotransmitter_receptor
Gria2	neurotransmitter_receptor
Grin1	neurotransmitter_receptor
Grin2a	neurotransmitter_receptor
Grin2b	neurotransmitter_receptor
Grin2c	neurotransmitter_receptor
Grin2d	neurotransmitter_receptor
Grin3a	neurotransmitter_receptor
Grin3b	neurotransmitter_receptor
Hrh1	neurotransmitter_receptor
Hrh2	neurotransmitter_receptor
Hrh3	neurotransmitter_receptor
Hrh4	neurotransmitter_receptor
Htr1a	neurotransmitter_receptor
Htr1b	neurotransmitter_receptor
Htr1d	neurotransmitter_receptor
Htr1f	neurotransmitter_receptor
Htr2a	neurotransmitter_receptor
Htr2b	neurotransmitter_receptor
Htr2c	neurotransmitter_receptor
Htr3a	neurotransmitter_receptor
Htr3b	neurotransmitter_receptor
Htr4	neurotransmitter_receptor
Htr5a	neurotransmitter_receptor
Htr6	neurotransmitter_receptor
Htr7	neurotransmitter_receptor
Abat	neurotransmitter_synthesis_transport
Chat	neurotransmitter_synthesis_transport
Dbh	neurotransmitter_synthesis_transport
Ddc	neurotransmitter_synthesis_transport
Gad1	neurotransmitter_synthesis_transport
Gad2	neurotransmitter_synthesis_transport
Gls	neurotransmitter_synthesis_transport
Hdc	neurotransmitter_synthesis_transport
Slc17a6	neurotransmitter_synthesis_transport
Slc17a7	neurotransmitter_synthesis_transport
Slc1a2	neurotransmitter_synthesis_transport
Slc1a3	neurotransmitter_synthesis_transport
Slc22a1	neurotransmitter_synthesis_transport
Slc22a3	neurotransmitter_synthesis_transport
Slc29a1	neurotransmitter_synthesis_transport
Slc29a2	neurotransmitter_synthesis_transport
Slc29a4	neurotransmitter_synthesis_transport
Slc5a7	neurotransmitter_synthesis_transport
Slc6a1	neurotransmitter_synthesis_transport
Slc6a11	neurotransmitter_synthesis_transport
Slc6a2	neurotransmitter_synthesis_transport
Slc6a3	neurotransmitter_synthesis_transport
Slc6a4	neurotransmitter_synthesis_transport
Slc6a5	neurotransmitter_synthesis_transport
Slc6a9	neurotransmitter_synthesis_transport
Th	neurotransmitter_synthesis_transport
Tph1	neurotransmitter_synthesis_transport
Tph2	neurotransmitter_synthesis_transport
1700003F12Rik	tf
1700020N01Rik	tf
1700086D15Rik	tf
2610021A01Rik	tf
2810021J22Rik	tf
3632451O06Rik	tf
4930430A15Rik	tf
4931423N10Rik	tf
4933429H19Rik	tf
9130019O22Rik	tf
AI854703	tf
Aatf	tf
Abt1	tf
Abtb1	tf
Acyp2	tf
Adnp	tf
Aebp1	tf
Aebp2	tf
Ago1	tf
Ahr	tf
Ahrr	tf
Aip	tf
Aire	tf
Alx3	tf
Alx4	tf
Ank1	tf
Ank2	tf
Ankfy1	tf
Ankhd1	tf
Ankra2	tf
Ankrd1	tf
Ankrd10	tf
Ankrd2	tf
Ankrd6	tf
App	tf
Ar	tf
Arhgap17	tf
Arid1a	tf
Arid3a	tf
Arid3b	tf
Arid3c	tf
Arid4a	tf
Arid5b	tf
Arnt	tf
Arnt2	tf
Arntl	tf
Arx	tf
Asb1	tf
Asb10	tf
Asb11	tf
Asb12	tf
Asb15	tf
Asb2	tf
Asb3	tf
Asb4	tf
Asb5	tf
Asb6	tf
Asb8	tf
Asb9	tf
Ascl1	tf
Ascl2	tf
Ascl3	tf
Ascl5	tf
Ash1l	tf
Ash2l	tf
Asxl1	tf
Atf1	tf
Atf2	tf
Atf3	tf
Atf4	tf
Atf5	tf
Atf6	tf
Atf6b	tf
Atf7ip	tf
Atm	tf
Atoh1	tf
Atoh7	tf
Atoh8	tf
BC024139	tf
Bach1	tf
Bach2	tf
Bard1	tf
Barhl1	tf
Barx1	tf
Barx2	tf
Basp1	tf
Batf	tf
Batf2	tf
Batf3	tf
Baz1a	tf
Baz1b	tf
Baz2a	tf
Bbx	tf
Bcl11a	tf
Bcl11b	tf
Bcl3	tf
Bcl6	tf
Bcl6b	tf
Bclaf1	tf
Bcor	tf
Bdp1	tf
Bhlha15	tf
Bhlhe22	tf
Bhlhe23	tf
Bhlhe40	tf
Bhlhe41	tf
Blzf1	tf
Bmi1	tf
Bmyc	tf
Bnc1	tf
Bpnt1	tf
Bptf	tf
Brca1	tf
Brd8	tf
Brdt	tf
Brpf1	tf
Bsx	tf
Btbd11	tf
Btf3	tf
C1d	tf
Calcoco1	tf
Camk4	tf
Carf	tf
Carhsp1	tf
Carm1	tf
Caskin1	tf
Cbfb	tf
Cbx2	tf
Cbx3	tf
Cbx4	tf
Cbx8	tf
Cc2d1a	tf
Cc2d1b	tf
Ccar1	tf
Ccnc	tf
Ccnh	tf
Ccnk	tf
Ccnt1	tf
Ccnt2	tf
Cdc5l	tf
Cdk2	tf
Cdk4	tf
Cdk7	tf
Cdk9	tf
Cdkn2a	tf
Cdkn2b	tf
Cdkn2c	tf
Cdkn2d	tf
Cdx1	tf
Cdx2	tf
Cdx4	tf
Cebpa	tf
Cebpb	tf
Cebpd	tf
Cebpe	tf
Cebpg	tf
Cebpz	tf
Cecr6	tf
Chd2	tf
Chd4	tf
Chd7	tf
Chgb	tf
Ciart	tf
Cic	tf
Cited1	tf
Cited2	tf
Cited4	tf
Clock	tf
Clp1	tf
Cnot7	tf
Cnot8	tf
Cops2	tf
Cops5	tf
Creb1	tf
Creb3	tf
Creb3l1	tf
Creb3l2	tf
Creb3l3	tf
Creb3l4	tf
Creb5	tf
Crebbp	tf
Crem	tf
Crx	tf
Cry1	tf
Ctbp2	tf
Ctcf	tf
Ctcfl	tf
Ctnnbl1	tf
Cux1	tf
Cux2	tf
Cxxc1	tf
Dach1	tf
Dach2	tf
Daxx	tf
Dazap2	tf
Dbp	tf
Dbx1	tf
Dbx2	tf
Ddit3	tf
Ddn	tf
Ddx20	tf
Ddx54	tf
Ddx58	tf
Deaf1	tf
Dedd	tf
Dedd2	tf
Dek	tf
Dhx36	tf
Dhx9	tf
Dido1	tf
Dlx1	tf
Dlx2	tf
Dlx3	tf
Dlx4	tf
Dlx5	tf
Dlx6	tf
Dmap1	tf
Dmrt1	tf
Dmrt2	tf
Dmrt3	tf
Dmrta1	tf
Dmrta2	tf
Dmrtb1	tf
Dmrtc2	tf
Dmtf1	tf
Dnmt1	tf
Dnmt3a	tf
Dot1l	tf
Dpf2	tf
Dpf3	tf
Dr1	tf
Drap1	tf
Drg1	tf
E2f1	tf
E2f2	tf
E2f3	tf
E2f4	tf
E2f5	tf
E2f6	tf
E2f7	tf
E2f8	tf
E4f1	tf
Ebf1	tf
Ebf2	tf
Ebf3	tf
Ebf4	tf
Eed	tf
Eef1d	tf
Egr1	tf
Egr2	tf
Egr3	tf
Egr4	tf
Ehf	tf
Elavl2	tf
Elf1	tf
Elf2	tf
Elf3	tf
Elf4	tf
Elf5	tf
Elk1	tf
Elk3	tf
Elk4	tf
Ell	tf
Ell2	tf
Emx1	tf
Emx2	tf
En1	tf
En2	tf
Enpp2	tf
Eomes	tf
Ep300	tf
Epas1	tf
Ercc2	tf
Ercc3	tf
Erf	tf
Erg	tf
Esr1	tf
Esr2	tf
Esrra	tf
Esrrb	tf
Esrrg	tf
Esx1	tf
Ets1	tf
Ets2	tf
Etv1	tf
Etv2	tf
Etv3	tf
Etv4	tf
Etv6	tf
Evx1	tf
Evx2	tf
Ezh1	tf
Ezh2	tf
Fah	tf
Fank1	tf
Fbxo24	tf
Fbxw7	tf
Fem1a	tf
Fem1b	tf
Fem1c	tf
Fev	tf
Fezf1	tf
Fezf2	tf
Fhl2	tf
Fhl5	tf
Figla	tf
Fli1	tf
Fmnl2	tf
Fos	tf
Fosb	tf
Fosl1	tf
Fosl2	tf
Foxa1	tf
Foxa2	tf
Foxa3	tf
Foxb1	tf
Foxb2	tf
Foxc1	tf
Foxc2	tf
Foxd1	tf
Foxd2	tf
Foxd3	tf
Foxd4	tf
Foxe1	tf
Foxe3	tf
Foxf1	tf
Foxf2	tf
Foxg1	tf
Foxh1	tf
Foxi1	tf
Foxi2	tf
Foxi3	tf
Foxj1	tf
Foxj2	tf
Foxj3	tf
Foxk1	tf
Foxk2	tf
Foxl1	tf
Foxl2	tf
Foxm1	tf
Foxn1	tf
Foxn2	tf
Foxn4	tf
Foxo1	tf
Foxo3	tf
Foxo4	tf
Foxo6	tf
Foxp1	tf
Foxp2	tf
Foxp3	tf
Foxp4	tf
Foxq1	tf
Foxs1	tf
Fubp1	tf
Fus	tf
Gabpa	tf
Gabpb1	tf
Gas7	tf
Gata1	tf
Gata2	tf
Gata3	tf
Gata4	tf
Gata5	tf
Gata6	tf
Gbx1	tf
Gbx2	tf
Gcdh	tf
Gcm1	tf
Gcm2	tf
Gfi1	tf
Gfi1b	tf
Gli1	tf
Gli2	tf
Gli3	tf
Glis1	tf
Glis2	tf
Glis3	tf
Gls2	tf
Gm1141	tf
Gm12258	tf
Gm4767	tf
Gmeb1	tf
Gmeb2	tf
Grhl1	tf
Grhl2	tf
Grhl3	tf
Gsc	tf
Gsc2	tf
Gsx1	tf
Gtf2a1	tf
Gtf2b	tf
Gtf2e1	tf
Gtf2e2	tf
Gtf2f2	tf
Gtf2h1	tf
Gtf2h2	tf
Gtf2h4	tf
Gtf2i	tf
Gtf2ird1	tf
Gtf3a	tf
Gtf3c1	tf
Gtf3c4	tf
Gzf1	tf
H3f3a	tf
H3f3b	tf
Hand1	tf
Hand2	tf
Hbp1	tf
Hcfc1	tf
Hcls1	tf
Hdac1	tf
Hdac10	tf
Hdac11	tf
Hdac2	tf
Hdac3	tf
Hdac4	tf
Hdac5	tf
Hdac6	tf
Hdac8	tf
Hdac9	tf
Hdgf	tf
Hdx	tf
Helt	tf
Helz	tf
Hes1	tf
Hes2	tf
Hes3	tf
Hes5	tf
Hes6	tf
Hes7	tf
Hesx1	tf
Hey1	tf
Hey2	tf
Heyl	tf
Hhex	tf
Hic1	tf
Hic2	tf
Hif1a	tf
Hif3a	tf
Hils1	tf
Hinfp	tf
Hipk2	tf
Hivep1	tf
Hivep2	tf
Hivep3	tf
Hlf	tf
Hlx	tf
Hmg20a	tf
Hmg20b	tf
Hmga1	tf
Hmga2	tf
Hmgb2	tf
Hmgb3	tf
Hmgcs1	tf
Hmgn2	tf
Hmx1	tf
Hmx2	tf
Hmx3	tf
Hnf1a	tf
Hnf1b	tf
Hnf4a	tf
Hnf4g	tf
Hnrnpu	tf
Homez	tf
Hoxa1	tf
Hoxa10	tf
Hoxa11	tf
Hoxa13	tf
Hoxa2	tf
Hoxa3	tf
Hoxa4	tf
Hoxa5	tf
Hoxa6	tf
Hoxa7	tf
Hoxa9	tf
Hoxb1	tf
Hoxb13	tf
Hoxb2	tf
Hoxb3	tf
Hoxb4	tf
Hoxb5	tf
Hoxb6	tf
Hoxb7	tf
Hoxb8	tf
Hoxb9	tf
Hoxc10	tf
Hoxc11	tf
Hoxc12	tf
Hoxc13	tf
Hoxc4	tf
Hoxc5	tf
Hoxc6	tf
Hoxc8	tf
Hoxc9	tf
Hoxd1	tf
Hoxd10	tf
Hoxd11	tf
Hoxd12	tf
Hoxd13	tf
Hoxd3	tf
Hoxd8	tf
Hoxd9	tf
Hsbp1	tf
Hsf1	tf
Hsf2	tf
Hsf2bp	tf
Hsf3	tf
Hsf4	tf
Hsf5	tf
Hsfy2	tf
Hspb9	tf
Htatip2	tf
Htr5a	tf
Id2	tf
Ighmbp2	tf
Ikbkb	tf
Ikbkg	tf
Ikzf1	tf
Ikzf2	tf
Ikzf3	tf
Ikzf4	tf
Ikzf5	tf
Ilf3	tf
Ing1	tf
Ing3	tf
Ing4	tf
Insm1	tf
Insm2	tf
Invs	tf
Irf1	tf
Irf2	tf
Irf2bp1	tf
Irf3	tf
Irf4	tf
Irf5	tf
Irf6	tf
Irf7	tf
Irf8	tf
Irf9	tf
Irx1	tf
Irx2	tf
Irx3	tf
Irx4	tf
Irx5	tf
Irx6	tf
Isl1	tf
Isl2	tf
Ivns1abp	tf
Jdp2	tf
Jmy	tf
Jun	tf
Junb	tf
Jund	tf
Kcnh8	tf
Kcnip3	tf
Kdm1a	tf
Kdm2b	tf
Kdm6a	tf
Kdm6b	tf
Keap1	tf
Khdrbs1	tf
Klf1	tf
Klf10	tf
Klf11	tf
Klf12	tf
Klf13	tf
Klf14	tf
Klf15	tf
Klf16	tf
Klf17	tf
Klf2	tf
Klf3	tf
Klf4	tf
Klf5	tf
Klf6	tf
Klf7	tf
Klf8	tf
Klf9	tf
L3mbtl2	tf
Lbh	tf
Ldb1	tf
Ldb2	tf
Lef1	tf
Lhx1	tf
Lhx2	tf
Lhx3	tf
Lhx4	tf
Lhx5	tf
Lhx6	tf
Lhx8	tf
Lhx9	tf
Limd1	tf
Litaf	tf
Lmo1	tf
Lmo2	tf
Lmo4	tf
Lmx1a	tf
Lmx1b	tf
Lrrc6	tf
Lrrfip1	tf
Lsm11	tf
Lsm4	tf
Lyl1	tf
Maf	tf
Mafb	tf
Maff	tf
Mafg	tf
Mafk	tf
Maged1	tf
Maml1	tf
Map3k12	tf
Mapk1	tf
Mapk3	tf
Mapk8	tf
Max	tf
Maz	tf
Mbd2	tf
Mbd3	tf
Mbd3l1	tf
Mcm2	tf
Mcm3	tf
Mcm4	tf
Mcm5	tf
Mcm6	tf
Mcm7	tf
Mcm8	tf
Mecom	tf
Mecp2	tf
Med1	tf
Med12	tf
Med8	tf
Mef2a	tf
Mef2c	tf
Mef2d	tf
Meis1	tf
Meis2	tf
Meis3	tf
Men1	tf
Meox1	tf
Meox2	tf
Mesp1	tf
Mesp2	tf
Mga	tf
Mid1	tf
Mitf	tf
Mixl1	tf
Mkl1	tf
Mkx	tf
Mllt1	tf
Mllt10	tf
Mllt3	tf
Mllt6	tf
Mlxipl	tf
Mnat1	tf
Mnt	tf
Mpl	tf
Msc	tf
Msgn1	tf
Msx1	tf
Msx2	tf
Msx3	tf
Mta1	tf
Mta2	tf
Mta3	tf
Mtf1	tf
Mtf2	tf
Mtpn	tf
Muc1	tf
Musk	tf
Mxd1	tf
Mxd3	tf
Mxd4	tf
Mxi1	tf
Myb	tf
Mybbp1a	tf
Mybl1	tf
Mybl2	tf
Myc	tf
Mycbp	tf
Mycl	tf
Mycn	tf
Mycs	tf
Myef2	tf
Myf5	tf
Myf6	tf
Mynn	tf
Myocd	tf
Myod1	tf
Myog	tf
Mypop	tf
Myt1	tf
Myt1l	tf
Mzf1	tf
Nab1	tf
Nab2	tf
Naca	tf
Nacc1	tf
Nacc2	tf
Nanog	tf
Ncoa1	tf
Ncoa2	tf
Ncoa3	tf
Ncoa4	tf
Ncoa5	tf
Ncoa6	tf
Ncor1	tf
Ncor2	tf
Ndn	tf
Nedd8	tf
Neurod1	tf
Neurod2	tf
Neurod4	tf
Neurod6	tf
Neurog1	tf
Neurog2	tf
Neurog3	tf
Nfat5	tf
Nfatc1	tf
Nfatc2	tf
Nfatc2ip	tf
Nfatc3	tf
Nfatc4	tf
Nfe2	tf
Nfe2l1	tf
Nfe2l2	tf
Nfe2l3	tf
Nfia	tf
Nfib	tf
Nfic	tf
Nfil3	tf
Nfix	tf
Nfkb1	tf
Nfkb2	tf
Nfkbib	tf
Nfkbie	tf
Nfkbil1	tf
Nfkbiz	tf
Nfx1	tf
Nfya	tf
Nfyb	tf
Nfyc	tf
Nhlh1	tf
Nhlh2	tf
Nkd2	tf
Nkrf	tf
Nkx1-1	tf
Nkx1-2	tf
Nkx2-1	tf
Nkx2-2	tf
Nkx2-3	tf
Nkx2-4	tf
Nkx2-5	tf
Nkx2-6	tf
Nkx2-9	tf
Nkx3-1	tf
Nkx3-2	tf
Nkx6-1	tf
Nkx6-2	tf
Nkx6-3	tf
Nlrc5	tf
Nmi	tf
Nobox	tf
Notch1	tf
Notch2	tf
Notch3	tf
Notch4	tf
Noto	tf
Npas1	tf
Npas2	tf
Npas3	tf
Npas4	tf
Nr0b1	tf
Nr0b2	tf
Nr1d1	tf
Nr1d2	tf
Nr1h2	tf
Nr1h3	tf
Nr1h4	tf
Nr1h5	tf
Nr1i2	tf
Nr1i3	tf
Nr2c1	tf
Nr2c2	tf
Nr2e1	tf
Nr2e3	tf
Nr2f1	tf
Nr2f2	tf
Nr2f6	tf
Nr3c1	tf
Nr3c2	tf
Nr4a1	tf
Nr4a2	tf
Nr4a3	tf
Nr5a1	tf
Nr5a2	tf
Nr6a1	tf
Nrarp	tf
Nrbf2	tf
Nrf1	tf
Nrip1	tf
Nrip2	tf
Nrl	tf
Nsd1	tf
Nudt12	tf
Nupr1	tf
Olig1	tf
Olig2	tf
Olig3	tf
Onecut1	tf
Onecut2	tf
Onecut3	tf
Ostf1	tf
Otp	tf
Otx1	tf
Otx2	tf
Ovol1	tf
Ovol2	tf
Ovol3	tf
Papola	tf
Papolb	tf
Patz1	tf
Pawr	tf
Pax1	tf
Pax2	tf
Pax3	tf
Pax4	tf
Pax5	tf
Pax6	tf
Pax7	tf
Pax8	tf
Pax9	tf
Pbx1	tf
Pbx2	tf
Pbx4	tf
Pbxip1	tf
Pdcd11	tf
Pdcd7	tf
Pdlim1	tf
Pdlim4	tf
Pdx1	tf
Peg3	tf
Per1	tf
Per2	tf
Per3	tf
Pfdn1	tf
Pgr	tf
Phf1	tf
Phf10	tf
Phf12	tf
Phf13	tf
Phf2	tf
Phf5a	tf
Phf7	tf
Phf8	tf
Phox2a	tf
Phox2b	tf
Phtf1	tf
Pias1	tf
Pitx1	tf
Pitx2	tf
Pitx3	tf
Pknox1	tf
Pknox2	tf
Pla2g6	tf
Plag1	tf
Plagl1	tf
Plagl2	tf
Plrg1	tf
Pmfbp1	tf
Pml	tf
Pms1	tf
Pogk	tf
Polr2a	tf
Polr2b	tf
Polr2c	tf
Polr2e	tf
Polr2g	tf
Polr2h	tf
Polr2i	tf
Polr2j	tf
Polr2k	tf
Polr2l	tf
Polr3b	tf
Polr3d	tf
Polr3e	tf
Polr3h	tf
Polrmt	tf
Pou1f1	tf
Pou2af1	tf
Pou2f1	tf
Pou2f2	tf
Pou2f3	tf
Pou3f1	tf
Pou3f2	tf
Pou3f3	tf
Pou3f4	tf
Pou4f1	tf
Pou4f2	tf
Pou4f3	tf
Pou5f1	tf
Pou5f2	tf
Pou6f1	tf
Pou6f2	tf
Ppara	tf
Ppard	tf
Pparg	tf
Ppargc1a	tf
Ppargc1b	tf
Ppp1r10	tf
Ppp1r12b	tf
Ppp1r12c	tf
Ppp1r13b	tf
Ppp1r16b	tf
Ppp1r1b	tf
Ppp2r1a	tf
Ppp3cb	tf
Ppp5c	tf
Pqbp1	tf
Prdm1	tf
Prdm15	tf
Prdm16	tf
Prdm4	tf
Prdm5	tf
Preb	tf
Prkar1a	tf
Prmt5	tf
Prop1	tf
Prox1	tf
Prox2	tf
Prr3	tf
Prrx1	tf
Prrx2	tf
Prrxl1	tf
Psmc3	tf
Psmc5	tf
Psmd10	tf
Psmd9	tf
Ptf1a	tf
Ptges2	tf
Ptma	tf
Pura	tf
Purb	tf
Rab11a	tf
Rab11b	tf
Rab15	tf
Rab18	tf
Rab25	tf
Rabl3	tf
Rad23b	tf
Rai1	tf
Rai14	tf
Rara	tf
Rarb	tf
Rarg	tf
Rax	tf
Rb1	tf
Rbak	tf
Rbbp4	tf
Rbbp7	tf
Rbl1	tf
Rbl2	tf
Rbm14	tf
Rbmx	tf
Rbmxl1	tf
Rbpj	tf
Rbpjl	tf
Rcor1	tf
Rel	tf
Rela	tf
Relb	tf
Rem2	tf
Rest	tf
Rfx1	tf
Rfx2	tf
Rfx3	tf
Rfx4	tf
Rfx5	tf
Rfx6	tf
Rfx7	tf
Rfx8	tf
Rfxank	tf
Rfxap	tf
Ring1	tf
Rnf14	tf
Rnf141	tf
Rnf38	tf
Rnf4	tf
Rnps1	tf
Rora	tf
Rorb	tf
Rorc	tf
Rps6ka4	tf
Rreb1	tf
Runx1	tf
Runx2	tf
Runx3	tf
Ruvbl1	tf
Ruvbl2	tf
Rxra	tf
Rxrb	tf
Rxrg	tf
Rybp	tf
Safb	tf
Sall1	tf
Sall2	tf
Sall3	tf
Sall4	tf
Sap18	tf
Sap30	tf
Satb1	tf
Satb2	tf
Scand1	tf
Scap	tf
Scmh1	tf
Scrt1	tf
Scrt2	tf
Scx	tf
Sec14l2	tf
Sertad1	tf
Sertad2	tf
Setbp1	tf
Sh3d19	tf
Shank3	tf
Shox2	tf
Shprh	tf
Siah2	tf
Sim1	tf
Sim2	tf
Sin3a	tf
Sin3b	tf
Sirt1	tf
Sirt2	tf
Sirt3	tf
Sirt4	tf
Sirt5	tf
Sirt6	tf
Sirt7	tf
Six1	tf
Six2	tf
Six3	tf
Six4	tf
Six5	tf
Six6	tf
Ski	tf
Skil	tf
Skor1	tf
Skor2	tf
Smad1	tf
Smad2	tf
Smad3	tf
Smad4	tf
Smad5	tf
Smad9	tf
Smarca1	tf
Smarca2	tf
Smarca4	tf
Smarca5	tf
Smarcb1	tf
Smarce1	tf
Smyd1	tf
Smyd3	tf
Snai1	tf
Snai2	tf
Snai3	tf
Snapc2	tf
Snapc3	tf
Snapc4	tf
Sncaip	tf
Snip1	tf
Snrpb	tf
Sohlh1	tf
Sohlh2	tf
Sox1	tf
Sox10	tf
Sox11	tf
Sox12	tf
Sox13	tf
Sox14	tf
Sox15	tf
Sox17	tf
Sox18	tf
Sox2	tf
Sox21	tf
Sox3	tf
Sox30	tf
Sox4	tf
Sox5	tf
Sox6	tf
Sox7	tf
Sox8	tf
Sox9	tf
Sp1	tf
Sp2	tf
Sp3	tf
Sp4	tf
Sp5	tf
Sp6	tf
Sp7	tf
Sp8	tf
Sp9	tf
Spdef	tf
Spi1	tf
Spib	tf
Spic	tf
Spz1	tf
Sqstm1	tf
Sra1	tf
Srebf1	tf
Srebf2	tf
Srf	tf
Ssbp2	tf
Ssbp3	tf
Ssbp4	tf
Ssrp1	tf
St18	tf
Stag1	tf
Stat1	tf
Stat2	tf
Stat3	tf
Stat4	tf
Stat5a	tf
Stat5b	tf
Stat6	tf
Stk16	tf
Strap	tf
Sub1	tf
Suz12	tf
T	tf
Taf10	tf
Taf11	tf
Taf12	tf
Taf13	tf
Taf1a	tf
Taf1b	tf
Taf1c	tf
Taf3	tf
Taf4b	tf
Taf5	tf
Taf5l	tf
Taf6	tf
Taf6l	tf
Taf7	tf
Tal1	tf
Tal2	tf
Tardbp	tf
Tbp	tf
Tbpl1	tf
Tbr1	tf
Tbx1	tf
Tbx10	tf
Tbx15	tf
Tbx18	tf
Tbx19	tf
Tbx2	tf
Tbx20	tf
Tbx21	tf
Tbx22	tf
Tbx3	tf
Tbx4	tf
Tbx5	tf
Tbx6	tf
Tcea1	tf
Tcea2	tf
Tcea3	tf
Tceal1	tf
Tcerg1	tf
Tcf12	tf
Tcf15	tf
Tcf19	tf
Tcf20	tf
Tcf21	tf
Tcf3	tf
Tcf4	tf
Tcf7	tf
Tcf7l1	tf
Tcf7l2	tf
Tcfl5	tf
Tead1	tf
Tead2	tf
Tead3	tf
Tead4	tf
Tef	tf
Tfam	tf
Tfap2a	tf
Tfap2b	tf
Tfap2c	tf
Tfap2e	tf
Tfap4	tf
Tfcp2	tf
Tfcp2l1	tf
Tfdp1	tf
Tfdp2	tf
Tfe3	tf
Tfeb	tf
Tfec	tf
Tgfb1i1	tf
Tgif1	tf
Tgif2	tf
Thap11	tf
Thra	tf
Thrap3	tf
Thrb	tf
Thrsp	tf
Tial1	tf
Tle1	tf
Tle3	tf
Tle4	tf
Tle6	tf
Tlx1	tf
Tlx2	tf
Tlx3	tf
Tmpo	tf
Tnfaip3	tf
Tob1	tf
Top1	tf
Trerf1	tf
Trib3	tf
Trim24	tf
Trim28	tf
Trip13	tf
Trip4	tf
Trip6	tf
Trp53	tf
Trp53bp1	tf
Trp63	tf
Trp73	tf
Trps1	tf
Trrap	tf
Tsg101	tf
Tulp4	tf
Twist1	tf
Twist2	tf
Ubn1	tf
Ubp1	tf
Ubtf	tf
Ugp2	tf
Uhrf1	tf
Uhrf2	tf
Usf1	tf
Usf2	tf
Usp3	tf
Utf1	tf
Vax1	tf
Vax2	tf
Vdr	tf
Vgll2	tf
Vsx1	tf
Wasl	tf
Wbp2	tf
Wiz	tf
Wt1	tf
Xab2	tf
Xbp1	tf
Xrcc3	tf
Yaf2	tf
Yap1	tf
Yy1	tf
Zbtb1	tf
Zbtb11	tf
Zbtb12	tf
Zbtb14	tf
Zbtb16	tf
Zbtb17	tf
Zbtb2	tf
Zbtb20	tf
Zbtb22	tf
Zbtb24	tf
Zbtb25	tf
Zbtb26	tf
Zbtb3	tf
Zbtb32	tf
Zbtb33	tf
Zbtb34	tf
Zbtb37	tf
Zbtb38	tf
Zbtb39	tf
Zbtb4	tf
Zbtb43	tf
Zbtb45	tf
Zbtb49	tf
Zbtb6	tf
Zbtb7a	tf
Zbtb7b	tf
Zbtb7c	tf
Zbtb8a	tf
Zbtb9	tf
Zcchc8	tf
Zdhhc1	tf
Zdhhc15	tf
Zdhhc16	tf
Zdhhc21	tf
Zdhhc5	tf
Zdhhc6	tf
Zeb1	tf
Zeb2	tf
Zfat	tf
Zfhx2	tf
Zfhx3	tf
Zfhx4	tf
Zfp1	tf
Zfp105	tf
Zfp108	tf
Zfp11	tf
Zfp110	tf
Zfp112	tf
Zfp113	tf
Zfp12	tf
Zfp128	tf
Zfp13	tf
Zfp131	tf
Zfp14	tf
Zfp142	tf
Zfp143	tf
Zfp146	tf
Zfp148	tf
Zfp160	tf
Zfp174	tf
Zfp180	tf
Zfp184	tf
Zfp189	tf
Zfp2	tf
Zfp202	tf
Zfp207	tf
Zfp213	tf
Zfp217	tf
Zfp219	tf
Zfp229	tf
Zfp236	tf
Zfp239	tf
Zfp24	tf
Zfp248	tf
Zfp251	tf
Zfp26	tf
Zfp260	tf
Zfp263	tf
Zfp27	tf
Zfp273	tf
Zfp275	tf
Zfp277	tf
Zfp28	tf
Zfp280b	tf
Zfp280c	tf
Zfp280d	tf
Zfp281	tf
Zfp282	tf
Zfp286	tf
Zfp287	tf
Zfp292	tf
Zfp296	tf
Zfp3	tf
Zfp30	tf
Zfp317	tf
Zfp319	tf
Zfp324	tf
Zfp334	tf
Zfp335	tf
Zfp341	tf
Zfp35	tf
Zfp354a	tf
Zfp354b	tf
Zfp354c	tf
Zfp358	tf
Zfp36	tf
Zfp362	tf
Zfp366	tf
Zfp367	tf
Zfp36l1	tf
Zfp37	tf
Zfp382	tf
Zfp384	tf
Zfp386	tf
Zfp39	tf
Zfp395	tf
Zfp397	tf
Zfp40	tf
Zfp408	tf
Zfp41	tf
Zfp410	tf
Zfp418	tf
Zfp42	tf
Zfp420	tf
Zfp422	tf
Zfp423	tf
Zfp426	tf
Zfp444	tf
Zfp445	tf
Zfp446	tf
Zfp449	tf
Zfp451	tf
Zfp454	tf
Zfp46	tf
Zfp467	tf
Zfp472	tf
Zfp473	tf
Zfp507	tf
Zfp513	tf
Zfp516	tf
Zfp523	tf
Zfp526	tf
Zfp53	tf
Zfp536	tf
Zfp551	tf
Zfp553	tf
Zfp560	tf
Zfp563	tf
Zfp568	tf
Zfp57	tf
Zfp574	tf
Zfp575	tf
Zfp580	tf
Zfp583	tf
Zfp592	tf
Zfp597	tf
Zfp599	tf
Zfp605	tf
Zfp606	tf
Zfp607b	tf
Zfp61	tf
Zfp612	tf
Zfp619	tf
Zfp62	tf
Zfp623	tf
Zfp628	tf
Zfp629	tf
Zfp637	tf
Zfp639	tf
Zfp64	tf
Zfp644	tf
Zfp647	tf
Zfp648	tf
Zfp652	tf
Zfp655	tf
Zfp661	tf
Zfp663	tf
Zfp664	tf
Zfp667	tf
Zfp668	tf
Zfp68	tf
Zfp683	tf
Zfp689	tf
Zfp691	tf
Zfp692	tf
Zfp697	tf
Zfp7	tf
Zfp704	tf
Zfp707	tf
Zfp710	tf
Zfp711	tf
Zfp712	tf
Zfp715	tf
Zfp74	tf
Zfp740	tf
Zfp746	tf
Zfp748	tf
Zfp750	tf
Zfp760	tf
Zfp768	tf
Zfp770	tf
Zfp771	tf
Zfp772	tf
Zfp773	tf
Zfp786	tf
Zfp809	tf
Zfp82	tf
Zfp821	tf
Zfp84	tf
Zfp846	tf
Zfp853	tf
Zfp865	tf
Zfp866	tf
Zfp867	tf
Zfp868	tf
Zfp87	tf
Zfp870	tf
Zfp871	tf
Zfp879	tf
Zfp9	tf
Zfp90	tf
Zfp91	tf
Zfp92	tf
Zfp94	tf
Zfp943	tf
Zfp945	tf
Zfp950	tf
Zfp954	tf
Zfp956	tf
Zfp958	tf
Zfp983	tf
Zfpm1	tf
Zfpm2	tf
Zfx	tf
Zgpat	tf
Zhx1	tf
Zhx3	tf
Zic1	tf
Zic2	tf
Zic3	tf
Zic4	tf
Zic5	tf
Zik1	tf
Zim1	tf
Zkscan1	tf
Zkscan14	tf
Zkscan16	tf
Zkscan17	tf
Zkscan2	tf
Zkscan3	tf
Zkscan4	tf
Zkscan5	tf
Zkscan6	tf
Zkscan7	tf
Zkscan8	tf
Zmynd11	tf
Znrd1	tf
Zscan10	tf
Zscan12	tf
Zscan2	tf
Zscan20	tf
Zscan21	tf
Zscan22	tf
Zscan25	tf
Zscan26	tf
Zscan29	tf
Zscan4e	tf
Zscan5b	tf
Zswim4	tf
Ano1	voltage_gated_channels
Ano6	voltage_gated_channels
Cachd1	voltage_gated_channels
Cacna1a	voltage_gated_channels
Cacna1b	voltage_gated_channels
Cacna1c	voltage_gated_channels
Cacna1d	voltage_gated_channels
Cacna1e	voltage_gated_channels
Cacna1f	voltage_gated_channels
Cacna1g	voltage_gated_channels
Cacna1h	voltage_gated_channels
Cacna1i	voltage_gated_channels
Cacna1s	voltage_gated_channels
Cacna2d1	voltage_gated_channels
Cacna2d2	voltage_gated_channels
Cacna2d3	voltage_gated_channels
Cacna2d4	voltage_gated_channels
Cacnb1	voltage_gated_channels
Cacnb2	voltage_gated_channels
Cacnb3	voltage_gated_channels
Cacnb4	voltage_gated_channels
Cacng1	voltage_gated_channels
Cacng2	voltage_gated_channels
Cacng3	voltage_gated_channels
Cacng4	voltage_gated_channels
Cacng5	voltage_gated_channels
Cacng7	voltage_gated_channels
Cacng8	voltage_gated_channels
Calhm1	voltage_gated_channels
Calhm3	voltage_gated_channels
Catsper1	voltage_gated_channels
Catsper3	voltage_gated_channels
Catsper4	voltage_gated_channels
Clcn1	voltage_gated_channels
Clcn2	voltage_gated_channels
Clcn3	voltage_gated_channels
Clcn4	voltage_gated_channels
Clcn5	voltage_gated_channels
Clcn6	voltage_gated_channels
Clcn7	voltage_gated_channels
Clcnka	voltage_gated_channels
Clcnkb	voltage_gated_channels
Cnga2	voltage_gated_channels
Gpr89	voltage_gated_channels
Grm7	voltage_gated_channels
Hcn1	voltage_gated_channels
Hcn2	voltage_gated_channels
Hcn3	voltage_gated_channels
Hcn4	voltage_gated_channels
Hvcn1	voltage_gated_channels
Itgav	voltage_gated_channels
Kcna1	voltage_gated_channels
Kcna10	voltage_gated_channels
Kcna2	voltage_gated_channels
Kcna3	voltage_gated_channels
Kcna4	voltage_gated_channels
Kcna5	voltage_gated_channels
Kcna6	voltage_gated_channels
Kcna7	voltage_gated_channels
Kcnab1	voltage_gated_channels
Kcnab2	voltage_gated_channels
Kcnab3	voltage_gated_channels
Kcnb1	voltage_gated_channels
Kcnb2	voltage_gated_channels
Kcnc1	voltage_gated_channels
Kcnc2	voltage_gated_channels
Kcnc3	voltage_gated_channels
Kcnc4	voltage_gated_channels
Kcnd1	voltage_gated_channels
Kcnd2	voltage_gated_channels
Kcnd3	voltage_gated_channels
Kcne1	voltage_gated_channels
Kcne2	voltage_gated_channels
Kcne3	voltage_gated_channels
Kcne4	voltage_gated_channels
Kcnf1	voltage_gated_channels
Kcng1	voltage_gated_channels
Kcng2	voltage_gated_channels
Kcng3	voltage_gated_channels
Kcng4	voltage_gated_channels
Kcnh1	voltage_gated_channels
Kcnh2	voltage_gated_channels
Kcnh3	voltage_gated_channels
Kcnh4	voltage_gated_channels
Kcnh5	voltage_gated_channels
Kcnh6	voltage_gated_channels
Kcnh7	voltage_gated_channels
Kcnh8	voltage_gated_channels
Kcnip2	voltage_gated_channels
Kcnj1	voltage_gated_channels
Kcnj10	voltage_gated_channels
Kcnj11	voltage_gated_channels
Kcnj12	voltage_gated_channels
Kcnj13	voltage_gated_channels
Kcnj14	voltage_gated_channels
Kcnj15	voltage_gated_channels
Kcnj16	voltage_gated_channels
Kcnj2	voltage_gated_channels
Kcnj3	voltage_gated_channels
Kcnj4	voltage_gated_channels
Kcnj5	voltage_gated_channels
Kcnj6	voltage_gated_channels
Kcnj8	voltage_gated_channels
Kcnj9	voltage_gated_channels
Kcnk1	voltage_gated_channels
Kcnk10	voltage_gated_channels
Kcnk12	voltage_gated_channels
Kcnk13	voltage_gated_channels
Kcnk15	voltage_gated_channels
Kcnk16	voltage_gated_channels
Kcnk18	voltage_gated_channels
Kcnk3	voltage_gated_channels
Kcnk4	voltage_gated_channels
Kcnk5	voltage_gated_channels
Kcnk6	voltage_gated_channels
Kcnk7	voltage_gated_channels
Kcnk9	voltage_gated_channels
Kcnma1	voltage_gated_channels
Kcnmb4	voltage_gated_channels
Kcnn1	voltage_gated_channels
Kcnn2	voltage_gated_channels
Kcnn3	voltage_gated_channels
Kcnn4	voltage_gated_channels
Kcnq1	voltage_gated_channels
Kcnq2	voltage_gated_channels
Kcnq3	voltage_gated_channels
Kcnq4	voltage_gated_channels
Kcnq5	voltage_gated_channels
Kcns1	voltage_gated_channels
Kcns2	voltage_gated_channels
Kcns3	voltage_gated_channels
Kcnt1	voltage_gated_channels
Kcnt2	voltage_gated_channels
Kcnv1	voltage_gated_channels
Kcnv2	voltage_gated_channels
Lrg1	voltage_gated_channels
Lrrc26	voltage_gated_channels
Lrrc38	voltage_gated_channels
Lrrc52	voltage_gated_channels
Lrrc55	voltage_gated_channels
Ncs1	voltage_gated_channels
P2rx5	voltage_gated_channels
Pkd2	voltage_gated_channels
Ptk2b	voltage_gated_channels
Rimbp2	voltage_gated_channels
Ryr1	voltage_gated_channels
Scn10a	voltage_gated_channels
Scn2a	voltage_gated_channels
Scn2b	voltage_gated_channels
Slc17a3	voltage_gated_channels
Snap25	voltage_gated_channels
Tmc1	voltage_gated_channels
Tmc2	voltage_gated_channels
Tmem266	voltage_gated_channels
Tmem37	voltage_gated_channels
Tpcn1	voltage_gated_channels
Tpcn2	voltage_gated_channels
Trpa1	voltage_gated_channels
Trpm4	voltage_gated_channels
Tspoap1	voltage_gated_channels
Vdac1	voltage_gated_channels
Vdac2	voltage_gated_channels
Vdac3	voltage_gated_channels
